# Supplementary material for: Identification of a Novel Imprinted Transcript in the Porcine GNAS Complex Locus Using Methylome and Transcriptome of Parthenogenetic Fetuses
Source: MDPI journal article supplement (doi:10.3390/genes11010096), 2020-01-14
Supplement: s1 [file s1]

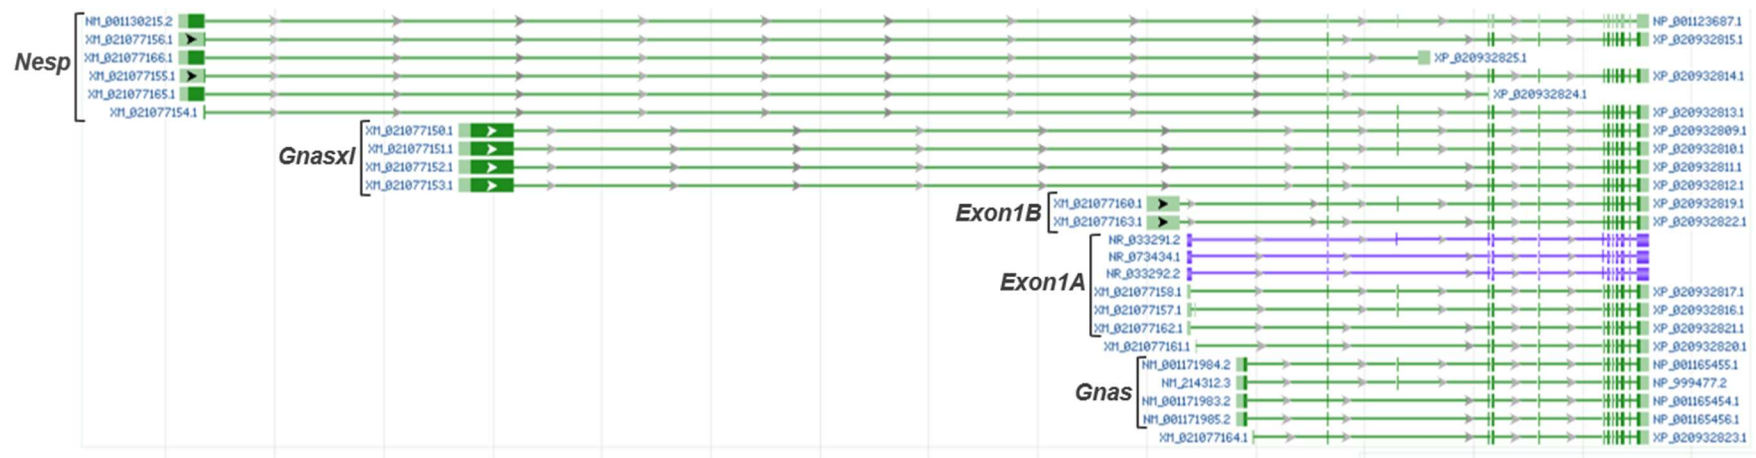

**Supplementary Figure 1.** Alternative promoter usages and subsequently generated splicing isoforms in the porcine *GNAS* complex locus. Protein coding (green-colored) and noncoding (purple-colored) transcripts originated from the *GNAS* complex locus are represented based on NCBI Gene database (<https://www.ncbi.nlm.nih.gov/gene>). Five major groups (*Nesp*, *Gnaxl*, *Exon1B*, *Exon 1A*, and *Gnax*) are indicated with brackets.
