# Supplementary material for: Identification of a Novel Imprinted Transcript in the Porcine GNAS Complex Locus Using Methylome and Transcriptome of Parthenogenetic Fetuses
Source: Genes (Basel). 2020 Jan 14;11(1):96. doi: 10.3390/genes11010096 (PMC7017182; doi:10.3390/genes11010096)
Supplement: Supplementary file 1 [file genes-11-00096-s001.zip]

Archive with 5 entries (5 files):
- Supplementary_Table_3.xlsx
- S.Figure1.pdf
- S.Figure2.pdf
- Supplementary_Table_1.xlsx
- Supplementary_Table_2.xlsx
