# Supplementary material for: Identification of a Novel Imprinted Transcript in the Porcine GNAS Complex Locus Using Methylome and Transcriptome of Parthenogenetic Fetuses
Source: Genes (Basel). 2020 Jan 14;11(1):96. doi: 10.3390/genes11010096 (PMC7017182; doi:10.3390/genes11010096)
Supplement: Supplementary file 1 [file genes-11-00096-s001.zip › Supplementary_Table_1.xlsx]

## Sheet: WGBS
Chr	Pos	Strand	Context	Methylation_ratio_CN1	Methylation_ratio_CN2	Methylation_ratio_CN3	Methylation_ratio_PA1	Methylation_ratio_PA2	Methylation_ratio_PA3	CN.Mean	PA.Mean	PA-CN.delta_mean	pvalue(t.test)
chr17	58830031	+	CG	1	1	0.857	1	1	0.917	0.952333	0.972333	0.02	0.739282
chr17	58830032	-	CG	0.9	0.938	0.895	0.938	0.9	1	0.911	0.946	0.035	0.360267
chr17	58830039	+	CG	0.75	0.8	0.75	1	1	0.917	0.766667	0.972333	0.205667	0.00594639
chr17	58830040	-	CG	0.9	1	0.944	1	0.9	0.923	0.948	0.941	-0.007	0.875301
chr17	58830050	+	CG	1	0.8	0.875	1	1	0.9	0.891667	0.966667	0.075	0.341464
chr17	58830051	-	CG	0.889	0.923	0.889	0.933	0.952	1	0.900333	0.961667	0.0613333	0.0710726
chr17	58830088	+	CG	0.5	1	1	1	1	1	0.833333	1	0.166667	0.42265
chr17	58830089	-	CG	0.75	1	1	0.923	0.909	1	0.916667	0.944	0.0273333	0.780556
chr17	58830111	+	CG	1	1	1	1	1	1	1	1	0	NA
chr17	58830112	-	CG	0.875	1	1	1	1	1	0.958333	1	0.0416667	0.42265
chr17	58830121	+	CG	1	0.8	1	1	1	1	0.933333	1	0.0666667	0.42265
chr17	58830122	-	CG	0.857	1	1	0.9	1	1	0.952333	0.966667	0.0143333	0.818833
chr17	58830179	-	CG	1	1	1	0.875	1	1	1	0.958333	-0.0416667	0.42265
chr17	58830218	+	CG	1	1	0.75	1	0.75	1	0.916667	0.916667	0	1
chr17	58830219	-	CG	0.667	0.667	0.9	0.875	0.875	1	0.744667	0.916667	0.172	0.144164
chr17	58830242	+	CG	1	0.833	1	1	1	1	0.944333	1	0.0556667	0.42265
chr17	58830243	-	CG	1	1	0.917	1	0.917	1	0.972333	0.972333	0	1
chr17	58830256	+	CG	1	1	1	1	1	1	1	1	0	NA
chr17	58830257	-	CG	1	1	0.917	0.889	0.727	1	0.972333	0.872	-0.100333	0.333757
chr17	58830264	+	CG	1	1	1	1	0.889	1	1	0.963	-0.037	0.42265
chr17	58830265	-	CG	0.8	1	0.923	0.875	0.9	1	0.907667	0.925	0.0173333	0.817545
chr17	58830313	+	CG	0.917	0.9	1	0.909	1	0.75	0.939	0.886333	-0.0526667	0.559079
chr17	58830314	-	CG	0.778	1	1	1	1	1	0.926	1	0.074	0.42265
chr17	58830342	+	CG	1	0.917	0.8	0.909	1	1	0.905667	0.969667	0.064	0.399975
chr17	58830343	-	CG	0.875	1	0.917	0.889	1	1	0.930667	0.963	0.0323333	0.568705
chr17	58830357	+	CG	0.909	0.846	1	0.923	0.889	1	0.918333	0.937333	0.019	0.750626
chr17	58830358	-	CG	0.889	1	1	0.9	0.9	1	0.963	0.933333	-0.0296667	0.583767
chr17	58830367	+	CG	1	1	1	0.933	0.9	1	1	0.944333	-0.0556667	0.198992
chr17	58830368	-	CG	0.889	1	1	1	1	1	0.963	1	0.037	0.42265
chr17	58830388	+	CG	1	1	1	0.812	1	1	1	0.937333	-0.0626667	0.42265
chr17	58830389	-	CG	1	1	1	1	1	0.857	1	0.952333	-0.0476667	0.42265
chr17	58830393	+	CG	1	0.933	0.875	0.938	1	1	0.936	0.979333	0.0433333	0.370236
chr17	58830394	-	CG	1	1	1	1	1	1	1	1	0	NA
chr17	58830509	+	CG	1	1	1	1	0.933	1	1	0.977667	-0.0223333	0.42265
chr17	58830510	-	CG	1	0.938	0.833	1	1	0.929	0.923667	0.976333	0.0526667	0.405101
chr17	58830511	+	CG	1	0.95	1	0.938	1	0.857	0.983333	0.931667	-0.0516667	0.341211
chr17	58830512	-	CG	1	1	1	1	1	1	1	1	0	NA
chr17	58830565	+	CG	1	0.789	1	0.944	1	1	0.929667	0.981333	0.0516667	0.543299
chr17	58830566	-	CG	0.769	0.789	0.923	1	0.8	0.882	0.827	0.894	0.067	0.426757
chr17	58830615	+	CG	0.833	0.944	0.8	1	1	0.7	0.859	0.9	0.041	0.734256
chr17	58830616	-	CG	0.867	1	1	0.8	0.8	0.857	0.955667	0.819	-0.136667	0.074284
chr17	58830641	+	CG	1	1	1	1	1	0.9	1	0.966667	-0.0333333	0.42265
chr17	58830642	-	CG	0.933	0.947	1	1	0.889	0.944	0.96	0.944333	-0.0156667	0.704738
chr17	58830650	+	CG	1	1	1	0.941	0.8	1	1	0.913667	-0.0863333	0.282884
chr17	58830651	-	CG	1	0.9	1	1	1	0.941	0.966667	0.980333	0.0136667	0.745726
chr17	58830658	+	CG	0.583	0.571	0.75	0.933	0.909	0.455	0.634667	0.765667	0.131	0.496666
chr17	58830659	-	CG	1	0.556	1	0.857	0.909	0.825	0.852	0.863667	0.0116667	0.944762
chr17	58830666	+	CG	0.929	0.929	0.75	1	0.8	1	0.869333	0.933333	0.064	0.514388
chr17	58830667	-	CG	1	0.842	1	0.857	1	0.75	0.947333	0.869	-0.0783333	0.435413
chr17	58830730	+	CG	0.923	0.857	1	1	1	0.923	0.926667	0.974333	0.0476667	0.392603
chr17	58830731	-	CG	1	0.867	1	1	0.833	0.929	0.955667	0.920667	-0.035	0.622272
chr17	58830814	+	CG	1	1	0.875	1	0.833	1	0.958333	0.944333	-0.014	0.850994
chr17	58830815	-	CG	0.889	1	1	0.909	0.75	1	0.963	0.886333	-0.0766667	0.419008
chr17	58830929	+	CG	1	1	0.833	1	0.875	1	0.944333	0.958333	0.014	0.850994
chr17	58830930	-	CG	1	1	1	1	1	1	1	1	0	NA
chr17	58830936	+	CG	1	1	0.833	1	1	1	0.944333	1	0.0556667	0.42265
chr17	58830937	-	CG	1	1	1	1	1	1	1	1	0	NA
chr17	58830941	+	CG	1	1	1	1	1	1	1	1	0	NA
chr17	58830942	-	CG	1	1	1	1	1	1	1	1	0	NA
chr17	58830947	+	CG	1	1	1	1	1	1	1	1	0	NA
chr17	58830948	-	CG	0.333	1	1	1	1	1	0.777667	1	0.222333	0.42265
chr17	58831027	+	CG	0.833	0.8	0.5	0.75	0.833	0.833	0.711	0.805333	0.0943333	0.470173
chr17	58831028	-	CG	1	0.5	1	0.667	1	1	0.833333	0.889	0.0556667	0.796726
chr17	58831039	+	CG	0.833	1	1	1	0.714	1	0.944333	0.904667	-0.0396667	0.741633
chr17	58831040	-	CG	1	1	1	1	1	1	1	1	0	NA
chr17	58831045	+	CG	1	1	1	1	0.875	1	1	0.958333	-0.0416667	0.42265
chr17	58831046	-	CG	1	1	1	1	1	1	1	1	0	NA
chr17	58831055	+	CG	1	0.8	1	1	1	0.857	0.933333	0.952333	0.019	0.829168
chr17	58831056	-	CG	1	1	1	1	1	1	1	1	0	NA
chr17	58831139	+	CG	0.889	1	0.833	1	0.8	1	0.907333	0.933333	0.026	0.770466
chr17	58831140	-	CG	1	1	1	1	0.9	1	1	0.966667	-0.0333333	0.42265
chr17	58831162	+	CG	1	1	0.857	1	0.833	1	0.952333	0.944333	-0.008	0.91845
chr17	58831163	-	CG	1	1	1	1	1	1	1	1	0	NA
chr17	58831178	+	CG	0.909	1	1	1	1	0.889	0.969667	0.963	-0.00666667	0.896161
chr17	58831179	-	CG	1	1	0.833	1	0.909	1	0.944333	0.969667	0.0253333	0.715456
chr17	58831239	+	CG	1	1	1	0.917	1	1	1	0.972333	-0.0276667	0.42265
chr17	58831240	-	CG	1	1	1	0.9	1	1	1	0.966667	-0.0333333	0.42265
chr17	58831269	+	CG	1	1	1	1	1	1	1	1	0	NA
chr17	58831270	-	CG	1	0.929	1	1	0.889	1	0.976333	0.963	-0.0133333	0.779093
chr17	58831278	+	CG	1	0.833	1	1	1	1	0.944333	1	0.0556667	0.42265
chr17	58831279	-	CG	0.818	0.933	1	1	1	1	0.917	1	0.083	0.258741
chr17	58831288	+	CG	1	1	1	1	0.857	1	1	0.952333	-0.0476667	0.42265
chr17	58831289	-	CG	0.909	0.933	1	1	1	1	0.947333	1	0.0526667	0.192763
chr17	58831469	+	CG	0.833	1	0.833	1	1	1	0.888667	1	0.111333	0.183503
chr17	58831470	-	CG	1	1	0.933	1	1	0.889	0.977667	0.963	-0.0146667	0.754878
chr17	58831498	+	CG	1	1	1	1	1	1	1	1	0	NA
chr17	58831499	-	CG	1	1	1	0.952	1	0.948	1	0.966667	-0.0333333	0.184156
chr17	58831543	+	CG	1	0.9	1	1	1	0.9	0.966667	0.966667	0	1
chr17	58831544	-	CG	0.955	1	1	1	1	1	0.985	1	0.015	0.42265
chr17	58831546	+	CG	1	1	0.909	1	1	1	0.969667	1	0.0303333	0.42265
chr17	58831547	-	CG	0.909	0.867	1	1	1	1	0.925333	1	0.0746667	0.197488
chr17	58831557	+	CG	1	1	0.917	1	0.857	1	0.972333	0.952333	-0.02	0.739282
chr17	58831558	-	CG	0.913	1	1	0.933	0.895	0.889	0.971	0.905667	-0.0653333	0.139193
chr17	58831719	+	CG	0.778	0.75	0.818	1	1	1	0.782	1	0.218	0.00809304
chr17	58831720	-	CG	0.5	1	1	0.667	0.882	0.9	0.833333	0.816333	-0.017	0.93217
chr17	58831733	+	CG	0.5	0.857	0.8	0.6	1	1	0.719	0.866667	0.147667	0.443728
chr17	58831734	-	CG	0.667	1	1	1	0.579	0.909	0.889	0.829333	-0.0596667	0.7427
chr17	58831750	+	CG	0.8	1	0.833	1	1	1	0.877667	1	0.122333	0.186784
chr17	58831751	-	CG	0.8	1	0.8	0.909	1	0.923	0.866667	0.944	0.0773333	0.37172
chr17	58831778	+	CG	0.333	0.571	0.909	0.667	1	0.75	0.604333	0.805667	0.201333	0.371592
chr17	58831779	-	CG	0.375	0.167	0.8	0.625	0.733	0.867	0.447333	0.741667	0.294333	0.250682
chr17	58831791	+	CG	0.167	0.5	0.833	0.333	0.667	0.25	0.5	0.416667	-0.0833333	0.738771
chr17	58831792	-	CG	0.357	0.286	0.7	0.714	0.647	0.867	0.447667	0.742667	0.295	0.132784
chr17	58831832	+	CG	0.429	0.6	1	0.667	0.75	1	0.676333	0.805667	0.129333	0.554257
chr17	58831833	-	CG	0.714	0.625	0.9	0.75	0.8	0.846	0.746333	0.798667	0.0523333	0.592801
chr17	58831876	+	CG	0.5	0.75	0.6	0.75	1	0.4	0.616667	0.716667	0.1	0.636688
chr17	58831877	-	CG	0.786	0.7	0.9	1	0.7	1	0.795333	0.9	0.104667	0.427934
chr17	58831890	+	CG	0.25	0	0.889	1	0.5	0.4	0.379667	0.633333	0.253667	0.48125
chr17	58831902	+	CG	1	0	0.889	1	0.5	0.7	0.629667	0.733333	0.103667	0.786587
chr17	58831903	-	CG	0.231	0.455	0.778	0.846	1	0.286	0.488	0.710667	0.222667	0.458025
chr17	58831939	+	CG	1	0.75	1	1	1	1	0.916667	1	0.0833333	0.42265
chr17	58831940	-	CG	0.923	1	0.857	1	0.933	0.889	0.926667	0.940667	0.014	0.803387
chr17	58831948	+	CG	1	0.75	0.8	0.8	0.8	0.833	0.85	0.811	-0.039	0.661696
chr17	58831949	-	CG	0.833	0.769	0.889	0.923	0.6	0.9	0.830333	0.807667	-0.0226667	0.852269
chr17	58831958	+	CG	1	0.75	0.75	0.8	0.8	1	0.833333	0.866667	0.0333333	0.771094
chr17	58831959	-	CG	1	1	1	1	1	0.8	1	0.933333	-0.0666667	0.42265
chr17	58831963	+	CG	0.5	0.5	1	0.571	0.8	1	0.666667	0.790333	0.123667	0.586109
chr17	58831964	-	CG	0.833	0.714	0.778	0.929	0.938	0.727	0.775	0.864667	0.0896667	0.329925
chr17	58831966	+	CG	0.5	0.75	1	0.571	0.75	0.6	0.75	0.640333	-0.109667	0.536895
chr17	58831967	-	CG	0.833	0.533	0.667	0.857	0.824	0.7	0.677667	0.793667	0.116	0.323405
chr17	58831968	+	CG	1	0.6	0.5	0.571	0.75	1	0.7	0.773667	0.0736667	0.728165
chr17	58831969	-	CG	0.917	0.933	1	0.857	1	0.8	0.95	0.885667	-0.0643333	0.400403
chr17	58831997	+	CG	0.667	0	0.5	0.625	0.75	0.667	0.389	0.680667	0.291667	0.281177
chr17	58831998	-	CG	1	0.688	0.636	0.714	0.75	0.545	0.774667	0.669667	-0.105	0.476294
chr17	58832000	+	CG	0.667	0	0.5	0.625	0.75	0.5	0.389	0.625	0.236	0.362617
chr17	58832001	-	CG	0.7	0.4	0.636	0.692	0.812	0.727	0.578667	0.743667	0.165	0.204582
chr17	58832010	+	CG	1	0	0.5	0.625	0.6	0.5	0.5	0.575	0.075	0.820099
chr17	58832011	-	CG	0.8	0.5	0.769	0.583	0.8	0.545	0.689667	0.642667	-0.047	0.724567
chr17	58832021	+	CG	0	0.25	0.5	0.556	0.4	0.5	0.25	0.485333	0.235333	0.239814
chr17	58832022	-	CG	1	0.438	0.769	0.636	1	0.7	0.735667	0.778667	0.043	0.839949
chr17	58832034	+	CG	1	0.25	1	0.833	0.8	1	0.75	0.877667	0.127667	0.664445
chr17	58832035	-	CG	1	0.571	0.923	0.833	0.889	0.727	0.831333	0.816333	-0.015	0.922834
chr17	58832067	-	CG	0.857	0.273	0.667	0.917	0.667	0.5	0.599	0.694667	0.0956667	0.675401
chr17	58832070	-	CG	1	0.182	0.5	0.818	0.611	0.667	0.560667	0.698667	0.138	0.625281
chr17	58832090	-	CG	0.889	0.2	0.778	0.667	0.529	0.571	0.622333	0.589	-0.0333333	0.891384
chr17	58832109	+	CG	1	0.143	0.375	0.636	1	0	0.506	0.545333	0.0393333	0.924297
chr17	58832110	-	CG	0.778	0.091	0.4	0.7	0.5	0.429	0.423	0.543	0.12	0.619757
chr17	58832130	+	CG	1	0.143	0.5	0.733	0.833	0.25	0.547667	0.605333	0.0576667	0.860931
chr17	58832131	-	CG	0.778	0.083	0.727	0.5	0.533	0.286	0.529333	0.439667	-0.0896667	0.734918
chr17	58832190	+	CG	1	0.571	0.875	0.875	0.667	0.429	0.815333	0.657	-0.158333	0.431519
chr17	58832191	-	CG	0.667	0.214	0.4	0.857	0.308	0.75	0.427	0.638333	0.211333	0.380979
chr17	58832196	+	CG	1	0.857	1	0.824	1	0.857	0.952333	0.893667	-0.0586667	0.461793
chr17	58832197	-	CG	1	0.769	0.9	0.857	0.692	0.75	0.889667	0.766333	-0.123333	0.216106
chr17	58832204	+	CG	1	1	1	0.867	0.833	0.571	1	0.757	-0.243	0.121659
chr17	58832205	-	CG	0.833	0.538	0.9	0.667	0.5	0.75	0.757	0.639	-0.118	0.433126
chr17	58832206	+	CG	1	1	1	1	0.833	0.429	1	0.754	-0.246	0.283795
chr17	58832207	-	CG	1	0.692	0.9	0.833	0.615	0.5	0.864	0.649333	-0.214667	0.182941
chr17	58832219	+	CG	1	0.8	0.75	0.75	0.833	0.75	0.85	0.777667	-0.0723333	0.450077
chr17	58832220	-	CG	1	0.5	0.636	0.667	0.417	0.4	0.712	0.494667	-0.217333	0.291479
chr17	58832228	+	CG	0.857	0.667	0.5	0.636	0.8	0.333	0.674667	0.589667	-0.085	0.64765
chr17	58832229	-	CG	0.667	0.308	0.5	0.5	0.333	0.167	0.491667	0.333333	-0.158333	0.32589
chr17	58832264	+	CG	0.8	0.75	1	0.909	1	0.8	0.85	0.903	0.053	0.611573
chr17	58832265	-	CG	0.667	0.75	0.5	0.8	0.636	0.857	0.639	0.764333	0.125333	0.274733
chr17	58832296	+	CG	0.875	0.889	0.667	0.812	0.6	0.778	0.810333	0.73	-0.0803333	0.455889
chr17	58832297	-	CG	1	0.778	0.667	0.25	0.6	0.571	0.815	0.473667	-0.341333	0.0847936
chr17	58832308	+	CG	0.875	0.75	0.923	0.938	1	0.8	0.849333	0.912667	0.0633333	0.465475
chr17	58832309	-	CG	1	1	1	1	0.875	0.857	1	0.910667	-0.0893333	0.185339
chr17	58832353	+	CG	1	1	0.9	0.875	1	1	0.966667	0.958333	-0.00833333	0.883807
chr17	58832354	-	CG	1	0.875	1	1	1	0.667	0.958333	0.889	-0.0693333	0.606303
chr17	58832389	+	CG	1	1	0.889	0.923	1	1	0.963	0.974333	0.0113333	0.815127
chr17	58832390	-	CG	1	1	1	1	0.8	0.875	1	0.891667	-0.108333	0.204413
chr17	58832395	+	CG	0.9	0.667	0.875	0.692	1	0.714	0.814	0.802	-0.012	0.927735
chr17	58832396	-	CG	0.667	1	0.8	1	0.5	1	0.822333	0.833333	0.011	0.957853
chr17	58832435	+	CG	0.9	0.75	1	1	1	1	0.883333	1	0.116667	0.249521
chr17	58832436	-	CG	1	0.75	0.909	1	0.667	0.75	0.886333	0.805667	-0.0806667	0.553617
chr17	58832472	+	CG	0.909	0.714	0.778	0.7	0.909	1	0.800333	0.869667	0.0693333	0.553437
chr17	58832473	-	CG	0.857	1	0.857	1	0.571	0.833	0.904667	0.801333	-0.103333	0.504186
chr17	58832519	+	CG	0.833	1	1	1	1	1	0.944333	1	0.0556667	0.42265
chr17	58832520	-	CG	1	1	1	1	1	1	1	1	0	NA
chr17	58832530	+	CG	0.923	0.8	1	0.846	0.9	1	0.907667	0.915333	0.00766667	0.922421
chr17	58832531	-	CG	1	1	0.917	1	1	1	0.972333	1	0.0276667	0.42265
chr17	58832533	+	CG	0.923	1	1	0.846	1	0.909	0.974333	0.918333	-0.056	0.352498
chr17	58832534	-	CG	1	1	1	0.917	1	0.6	1	0.839	-0.161	0.31739
chr17	58832554	+	CG	0.636	0.833	0.9	1	0.909	0.909	0.789667	0.939333	0.149667	0.190869
chr17	58832555	-	CG	1	0.857	0.818	0.833	1	0.778	0.891667	0.870333	-0.0213333	0.818135
chr17	58832605	+	CG	0.9	1	0.833	0.833	0.909	0.933	0.911	0.891667	-0.0193333	0.755172
chr17	58832606	-	CG	0.75	0.857	0.778	0.9	0.923	1	0.795	0.941	0.146	0.0296858
chr17	58832639	+	CG	0.75	1	1	0.933	1	1	0.916667	0.977667	0.061	0.544696
chr17	58832640	-	CG	1	1	1	1	1	1	1	1	0	NA
chr17	58832661	+	CG	1	0.667	1	1	0.9	0.9	0.889	0.933333	0.0443333	0.73386
chr17	58832662	-	CG	1	1	0.889	1	1	1	0.963	1	0.037	0.42265
chr17	58832717	+	CG	1	1	1	0.909	1	1	1	0.969667	-0.0303333	0.42265
chr17	58832718	-	CG	1	1	0.667	0.75	1	0.8	0.889	0.85	-0.039	0.788353
chr17	58832720	+	CG	0.667	1	1	1	1	1	0.889	1	0.111	0.42265
chr17	58832721	-	CG	1	1	0.833	1	1	0.75	0.944333	0.916667	-0.0276667	0.79806
chr17	58832722	+	CG	0.667	1	1	1	1	1	0.889	1	0.111	0.42265
chr17	58832723	-	CG	1	1	0.833	1	1	1	0.944333	1	0.0556667	0.42265
chr17	58832743	+	CG	1	1	0.875	1	1	0.857	0.958333	0.952333	-0.006	0.929132
chr17	58832744	-	CG	1	0.5	0.833	1	1	1	0.777667	1	0.222333	0.269484
chr17	58832792	+	CG	1	1	1	1	1	1	1	1	0	NA
chr17	58832794	+	CG	1	1	1	0.889	0.857	0.8	1	0.848667	-0.151333	0.0283295
chr17	58832816	+	CG	0.6	0.833	1	0.9	1	1	0.811	0.966667	0.155667	0.310327
chr17	58832822	+	CG	0.5	1	0.875	0.8	1	1	0.791667	0.933333	0.141667	0.457126
chr17	58832879	+	CG	0.571	0.6	0.833	0.7	0.667	0.75	0.668	0.705667	0.0376667	0.699786
chr17	58832932	+	CG	0	0	0.9	0.75	0.667	0.143	0.3	0.52	0.22	0.574832
chr17	58832969	+	CG	0.375	1	0.818	0.733	0.667	0.857	0.731	0.752333	0.0213333	0.921008
chr17	58832995	+	CG	0.625	1	0.909	0.941	0.571	1	0.844667	0.837333	-0.00733333	0.968716
chr17	58832996	-	CG	0.667	1	0.8	0.667	1	0.667	0.822333	0.778	-0.0443333	0.778642
chr17	58833035	+	CG	0.6	1	1	0.789	0.625	1	0.866667	0.804667	-0.062	0.737329
chr17	58833036	-	CG	0.333	1	1	0.667	1	0.429	0.777667	0.698667	-0.079	0.790912
chr17	58833097	+	CG	0.25	0.5	0.857	0.933	0.6	1	0.535667	0.844333	0.308667	0.232621
chr17	58833122	+	CG	0.75	1	0.875	0.917	0.667	0.857	0.875	0.813667	-0.0613333	0.588279
chr17	58833123	-	CG	0.75	1	0.4	0.333	1	0.625	0.716667	0.652667	-0.064	0.817727
chr17	58833143	+	CG	0.667	1	1	0.889	0.923	1	0.889	0.937333	0.0483333	0.711429
chr17	58833144	-	CG	0.75	0.5	1	0.5	1	0.5	0.75	0.666667	-0.0833333	0.72503
chr17	58833150	+	CG	0.875	1	0.714	0.889	0.867	0.857	0.863	0.871	0.008	0.932062
chr17	58833151	-	CG	0.75	1	1	0.667	1	0.857	0.916667	0.841333	-0.0753333	0.586915
chr17	58833161	+	CG	0.875	1	0.833	0.75	0.938	1	0.902667	0.896	-0.00666667	0.94522
chr17	58833162	-	CG	0.5	0.5	1	0.667	0.667	0.833	0.666667	0.722333	0.0556667	0.776419
chr17	58833249	+	CG	0.4	0.875	0.857	0.643	0.833	0.889	0.710667	0.788333	0.0776667	0.684054
chr17	58833250	-	CG	0.4	1	1	0.5	0.833	0.75	0.8	0.694333	-0.105667	0.669411
chr17	58833335	+	CG	0.214	0.917	0.833	0.824	0.833	0.909	0.654667	0.855333	0.200667	0.461325
chr17	58833336	-	CG	0.667	1	0.8	0	0.667	1	0.822333	0.555667	-0.266667	0.465546
chr17	58833356	+	CG	0.769	0.923	0.85	0.846	1	0.889	0.847333	0.911667	0.0643333	0.371033
chr17	58833357	-	CG	1	1	1	0.5	0.857	1	1	0.785667	-0.214333	0.286149
chr17	58833424	+	CG	0.909	0.846	0.833	0.769	0.941	1	0.862667	0.903333	0.0406667	0.624895
chr17	58833425	-	CG	0.667	0.5	1	1	0.667	1	0.722333	0.889	0.166667	0.420225
chr17	58833464	+	CG	0.889	1	0.75	0.938	1	1	0.879667	0.979333	0.0996667	0.300344
chr17	58833465	-	CG	0.5	0.667	1	1	1	0.5	0.722333	0.833333	0.111	0.644021
chr17	58833477	+	CG	0.9	1	0.875	1	1	1	0.925	1	0.075	0.188497
chr17	58833478	-	CG	0.5	1	0.833	1	1	1	0.777667	1	0.222333	0.269484
chr17	58833502	+	CG	0.9	0.833	0.737	0.824	0.889	0.917	0.823333	0.876667	0.0533333	0.397336
chr17	58833503	-	CG	0.5	0.333	0.714	1	1	1	0.515667	1	0.484333	0.0481193
chr17	58833543	+	CG	0.889	1	0.812	0.938	0.812	0.909	0.900333	0.886333	-0.014	0.844814
chr17	58833544	-	CG	0.5	1	0.857	1	1	1	0.785667	1	0.214333	0.286149
chr17	58833547	+	CG	0.889	1	0.933	0.938	0.875	0.909	0.940667	0.907333	-0.0333333	0.431631
chr17	58833548	-	CG	0.5	0.667	0.571	0.667	1	1	0.579333	0.889	0.309667	0.0915187
chr17	58833577	+	CG	0.727	1	0.875	0.75	0.857	1	0.867333	0.869	0.00166667	0.988334
chr17	58833578	-	CG	0.5	1	0.833	1	0.667	1	0.777667	0.889	0.111333	0.580415
chr17	58833584	+	CG	0.727	1	0.882	0.938	0.923	1	0.869667	0.953667	0.084	0.401608
chr17	58833585	-	CG	0.5	1	0.833	0.8	1	1	0.777667	0.933333	0.155667	0.410723
chr17	58833608	+	CG	0.8	1	0.933	0.765	0.8	0.9	0.911	0.821667	-0.0893333	0.286733
chr17	58833609	-	CG	1	1	0.833	1	1	1	0.944333	1	0.0556667	0.42265
chr17	58833658	+	CG	0.667	0.833	0.769	0.857	0.929	1	0.756333	0.928667	0.172333	0.0548865
chr17	58833659	-	CG	0	0	1	1	1	1	0.333333	1	0.666667	0.183503
chr17	58833669	-	CG	0	0	1	1	1	1	0.333333	1	0.666667	0.183503
chr17	58833707	+	CG	0.667	0.667	0.867	0.846	0.857	1	0.733667	0.901	0.167333	0.120102
chr17	58833708	-	CG	1	1	0.833	1	1	1	0.944333	1	0.0556667	0.42265
chr17	58833710	+	CG	1	1	0.857	0.786	0.917	1	0.952333	0.901	-0.0513333	0.550833
chr17	58833711	-	CG	0.5	1	0.6	1	1	1	0.7	1	0.3	0.188497
chr17	58833725	+	CG	1	1	0.882	0.75	0.824	1	0.960667	0.858	-0.102667	0.30745
chr17	58833726	-	CG	1	1	0.5	1	1	0.8	0.833333	0.933333	0.1	0.621408
chr17	58833842	+	CG	0.643	0.818	0.8	0.875	0.833	0.933	0.753667	0.880333	0.126667	0.136154
chr17	58833843	-	CG	0.556	1	0.8	0.75	1	1	0.785333	0.916667	0.131333	0.446632
chr17	58833881	+	CG	0.8	1	0.85	0.7	0.95	0.938	0.883333	0.862667	-0.0206667	0.84895
chr17	58833882	-	CG	0.75	1	1	1	1	0.857	0.916667	0.952333	0.0356667	0.733623
chr17	58833900	+	CG	0.571	0.923	0.85	0.778	0.882	1	0.781333	0.886667	0.105333	0.456524
chr17	58833901	-	CG	0.846	0.857	1	1	1	1	0.901	1	0.099	0.184063
chr17	58833906	+	CG	0.571	0.846	0.824	0.778	0.938	0.933	0.747	0.883	0.136	0.270547
chr17	58833907	-	CG	0.769	0.833	1	1	0.778	1	0.867333	0.926	0.0586667	0.592929
chr17	58833923	+	CG	0.833	0.909	0.944	0.571	0.75	0.733	0.895333	0.684667	-0.210667	0.0451888
chr17	58833924	-	CG	0.769	1	0.769	0.857	0.778	1	0.846	0.878333	0.0323333	0.764757
chr17	58833936	+	CG	0.875	0.917	0.895	0.875	1	0.929	0.895667	0.934667	0.039	0.397262
chr17	58833937	-	CG	0.846	1	0.857	1	0.9	0.833	0.901	0.911	0.01	0.89238
chr17	58833975	+	CG	0.7	1	0.812	0.545	0.769	0.875	0.837333	0.729667	-0.107667	0.457316
chr17	58833976	-	CG	0.571	0.75	0.786	0.833	0.667	0.5	0.702333	0.666667	-0.0356667	0.777255
chr17	58834006	+	CG	0.7	0.857	0.929	0.8	0.75	0.9	0.828667	0.816667	-0.012	0.890111
chr17	58834007	-	CG	0.727	1	1	0.9	0.75	0.8	0.909	0.816667	-0.0923333	0.430833
chr17	58834023	+	CG	0.75	0.857	0.917	0.8	0.923	1	0.841333	0.907667	0.0663333	0.433482
chr17	58834024	-	CG	0.583	1	0.818	0.9	1	0.833	0.800333	0.911	0.110667	0.465345
chr17	58834104	+	CG	0.857	1	1	0.833	0.938	1	0.952333	0.923667	-0.0286667	0.695739
chr17	58834105	-	CG	0.909	1	1	0.875	1	0.9	0.969667	0.925	-0.0446667	0.414017
chr17	58834114	+	CG	0.769	0.917	0.929	0.9	1	0.923	0.871667	0.941	0.0693333	0.323825
chr17	58834115	-	CG	0.556	0.818	1	0.75	1	0.7	0.791333	0.816667	0.0253333	0.881716
chr17	58834168	+	CG	0.636	1	0.952	0.889	0.923	0.929	0.862667	0.913667	0.051	0.699543
chr17	58834169	-	CG	0.571	0.818	1	1	0.714	0.917	0.796333	0.877	0.0806667	0.624051
chr17	58834194	+	CG	0.667	0.867	0.944	0.875	0.818	0.929	0.826	0.874	0.048	0.630891
chr17	58834195	-	CG	0.667	1	1	0.833	0.778	0.833	0.889	0.814667	-0.0743333	0.573631
chr17	58834196	+	CG	0.615	0.938	1	1	0.909	1	0.851	0.969667	0.118667	0.426796
chr17	58834197	-	CG	0.667	0.909	0.846	0.833	0.889	1	0.807333	0.907333	0.1	0.325081
chr17	58834265	+	CG	0.714	0.947	0.931	0.941	0.875	0.895	0.864	0.903667	0.0396667	0.654843
chr17	58834266	-	CG	0.625	0.933	1	0.667	0.867	1	0.852667	0.844667	-0.008	0.960272
chr17	58834269	+	CG	0.714	1	0.966	0.944	1	0.947	0.893333	0.963667	0.0703333	0.51927
chr17	58834270	-	CG	0.6	0.938	0.929	0.8	0.867	1	0.822333	0.889	0.0666667	0.632392
chr17	58834300	+	CG	0.75	0.824	0.931	0.8	0.938	1	0.835	0.912667	0.0776667	0.382369
chr17	58834301	-	CG	0.583	1	0.857	0.625	0.833	0.75	0.813333	0.736	-0.0773333	0.611522
chr17	58834339	+	CG	0.682	0.933	0.957	0.76	0.875	0.941	0.857333	0.858667	0.00133333	0.990384
chr17	58834340	-	CG	0.556	0.812	0.846	0.889	0.85	1	0.738	0.913	0.175	0.187392
chr17	58834402	+	CG	0.667	0.8	0.846	0.957	0.889	1	0.771	0.948667	0.177667	0.0592934
chr17	58834403	-	CG	0.9	0.846	0.786	0.846	0.867	0.833	0.844	0.848667	0.00466667	0.902753
chr17	58834449	+	CG	0.875	1	0.867	1	0.917	0.875	0.914	0.930667	0.0166667	0.783384
chr17	58834450	-	CG	0.111	0.6	1	0.952	0.917	0.222	0.570333	0.697	0.126667	0.735928
chr17	58834461	+	CG	1	1	0.929	0.941	0.833	1	0.976333	0.924667	-0.0516667	0.414162
chr17	58834462	-	CG	1	0.923	1	0.95	0.917	1	0.974333	0.955667	-0.0186667	0.624326
chr17	58834472	+	CG	1	0.875	0.929	0.929	0.833	0.867	0.934667	0.876333	-0.0583333	0.275885
chr17	58834473	-	CG	1	0.923	1	0.913	0.929	0.929	0.974333	0.923667	-0.0506667	0.182775
chr17	58834500	+	CG	0.923	1	1	1	1	1	0.974333	1	0.0256667	0.42265
chr17	58834501	-	CG	1	1	1	0.958	0.75	0.812	1	0.84	-0.16	0.121921
chr17	58834532	+	CG	0.533	0.909	0.789	0.786	0.889	0.667	0.743667	0.780667	0.037	0.790396
chr17	58834533	-	CG	0.889	0.941	0.818	0.85	0.818	0.941	0.882667	0.869667	-0.013	0.812335
chr17	58834601	+	CG	0.895	1	0.84	0.944	1	0.955	0.911667	0.966333	0.0546667	0.367218
chr17	58834602	-	CG	0.8	1	0.727	0.947	0.833	1	0.842333	0.926667	0.0843333	0.436244
chr17	58834609	+	CG	1	1	0.923	1	0.818	1	0.974333	0.939333	-0.035	0.635847
chr17	58834610	-	CG	1	1	0.9	0.947	0.923	1	0.966667	0.956667	-0.01	0.818021
chr17	58834628	+	CG	1	0.833	0.81	0.812	0.8	0.955	0.881	0.855667	-0.0253333	0.761741
chr17	58834629	-	CG	1	1	1	0.95	1	1	1	0.983333	-0.0166667	0.42265
chr17	58834691	+	CG	0.857	0.75	0.895	0.889	0.929	0.947	0.834	0.921667	0.0876667	0.170574
chr17	58834692	-	CG	1	0.909	1	0.941	0.917	0.857	0.969667	0.905	-0.0646667	0.177791
chr17	58834709	+	CG	0.895	1	0.833	0.882	1	0.875	0.909333	0.919	0.00966667	0.886432
chr17	58834710	-	CG	1	1	0.8	1	0.846	0.923	0.933333	0.923	-0.0103333	0.904483
chr17	58834788	+	CG	0.852	1	0.944	0.938	0.941	0.929	0.932	0.936	0.004	0.934705
chr17	58834789	-	CG	0.667	1	0.778	1	0.889	1	0.815	0.963	0.148	0.266693
chr17	58834797	+	CG	0.75	0.923	0.833	0.8	0.706	0.812	0.835333	0.772667	-0.0626667	0.364114
chr17	58834798	-	CG	0.5	1	0.625	1	0.667	0.923	0.708333	0.863333	0.155	0.446148
chr17	58834870	+	CG	0.765	0.875	1	0.929	0.765	0.941	0.88	0.878333	-0.00166667	0.985903
chr17	58834871	-	CG	0.778	0.75	0.889	1	0.857	0.9	0.805667	0.919	0.113333	0.131751
chr17	58835049	+	CG	0.952	1	0.875	1	1	1	0.942333	1	0.0576667	0.254054
chr17	58835050	-	CG	0.875	1	0.917	1	0.875	1	0.930667	0.958333	0.0276667	0.64493
chr17	58835131	+	CG	0.95	0.923	0.846	0.857	0.846	0.9	0.906333	0.867667	-0.0386667	0.351886
chr17	58835132	-	CG	0.75	0.875	1	1	1	1	0.875	1	0.125	0.225403
chr17	58835199	+	CG	1	1	1	1	1	1	1	1	0	NA
chr17	58835200	-	CG	0.923	1	1	1	0.714	0.929	0.974333	0.881	-0.0933333	0.393148
chr17	58835266	+	CG	0.9	0.8	0.889	1	0.833	0.875	0.863	0.902667	0.0396667	0.546548
chr17	58835267	-	CG	0.875	0.8	1	0.857	1	0.714	0.891667	0.857	-0.0346667	0.750733
chr17	58835349	+	CG	1	1	0.947	1	0.889	1	0.982333	0.963	-0.0193333	0.670813
chr17	58835350	-	CG	1	1	1	1	1	0.9	1	0.966667	-0.0333333	0.42265
chr17	58835359	+	CG	1	1	0.895	0.917	1	1	0.965	0.972333	0.00733333	0.877813
chr17	58835360	-	CG	1	1	1	1	1	0.818	1	0.939333	-0.0606667	0.42265
chr17	58835371	+	CG	1	0.9	0.75	0.917	1	0.9	0.883333	0.939	0.0556667	0.536658
chr17	58835372	-	CG	0.875	1	1	0.667	1	0.818	0.958333	0.828333	-0.13	0.311302
chr17	58835395	+	CG	0.727	1	0.941	1	1	0.917	0.889333	0.972333	0.083	0.42672
chr17	58835396	-	CG	1	0.875	1	0.889	1	0.917	0.958333	0.935333	-0.023	0.689649
chr17	58835421	+	CG	0.786	1	0.938	0.667	1	0.923	0.908	0.863333	-0.0446667	0.729859
chr17	58835422	-	CG	1	1	1	0.9	1	0.923	1	0.941	-0.059	0.190311
chr17	58835485	+	CG	0.947	0.917	1	0.9	0.9	1	0.954667	0.933333	-0.0213333	0.634581
chr17	58835486	-	CG	1	0.889	1	1	0.9	0.933	0.963	0.944333	-0.0186667	0.714041
chr17	58835533	+	CG	0.947	0.9	0.833	0.9	1	0.846	0.893333	0.915333	0.022	0.715885
chr17	58835534	-	CG	1	0.917	0.818	0.727	1	0.882	0.911667	0.869667	-0.042	0.684325
chr17	58835610	+	CG	0.889	0.9	0.889	0.417	1	0.727	0.892667	0.714667	-0.178	0.401351
chr17	58835611	-	CG	0.875	0.818	0.75	0.778	1	0.944	0.814333	0.907333	0.093	0.305364
chr17	58835650	+	CG	0.857	1	0.846	0.5	1	0.636	0.901	0.712	-0.189	0.333216
chr17	58835651	-	CG	0.636	0.9	0.688	0.714	1	0.938	0.741333	0.884	0.142667	0.295641
chr17	58835655	+	CG	0.857	0.7	0.733	0.375	1	0.778	0.763333	0.717667	-0.0456667	0.829224
chr17	58835656	-	CG	0.636	1	0.625	0.375	1	0.933	0.753667	0.769333	0.0156667	0.950276
chr17	58835677	+	CG	1	1	0.786	0.667	0.909	1	0.928667	0.858667	-0.07	0.600713
chr17	58835678	-	CG	0.9	1	0.8	0.75	0.944	1	0.9	0.898	-0.002	0.984319
chr17	58835688	+	CG	0.846	1	0.571	0.5	0.9	0.727	0.805667	0.709	-0.0966667	0.601753
chr17	58835689	-	CG	0.917	0.667	0.615	0.429	1	0.923	0.733	0.784	0.051	0.816676
chr17	58835752	+	CG	0.917	1	0.833	0.867	1	1	0.916667	0.955667	0.039	0.583797
chr17	58835753	-	CG	0.889	1	1	0.667	0.929	0.917	0.963	0.837667	-0.125333	0.279145
chr17	58835771	+	CG	0.533	0.667	0.438	0.529	0.889	0.882	0.546	0.766667	0.220667	0.199522
chr17	58835772	-	CG	0.875	0.857	0.2	0.6	0.7	0.923	0.644	0.741	0.097	0.717667
chr17	58835837	+	CG	0.812	0.933	0.789	0.786	0.786	0.762	0.844667	0.778	-0.0666667	0.272356
chr17	58835838	-	CG	0.625	0.857	0.714	0.667	1	0.909	0.732	0.858667	0.126667	0.358688
chr17	58835848	+	CG	0.947	1	0.938	0.938	0.833	1	0.961667	0.923667	-0.038	0.528028
chr17	58835849	-	CG	1	0.833	0.889	1	0.917	0.8	0.907333	0.905667	-0.00166667	0.983578
chr17	58835864	+	CG	0.941	0.857	0.6	0.842	0.692	0.842	0.799333	0.792	-0.00733333	0.952932
chr17	58835865	-	CG	1	1	0.444	0.857	0.923	0.636	0.814667	0.805333	-0.00933333	0.966642
chr17	58835902	+	CG	1	0.889	0.933	1	0.8	1	0.940667	0.933333	-0.00733333	0.927599
chr17	58835903	-	CG	1	1	0.714	0.8	1	1	0.904667	0.933333	0.0286667	0.818833
chr17	58835904	+	CG	0.933	1	0.867	0.941	0.933	0.947	0.933333	0.940333	0.007	0.872511
chr17	58835905	-	CG	1	1	0.75	0.8	1	1	0.916667	0.933333	0.0166667	0.883807
chr17	58835907	+	CG	1	0.889	0.929	0.778	1	1	0.939333	0.926	-0.0133333	0.880342
chr17	58835908	-	CG	1	1	0.75	1	0.923	0.857	0.916667	0.926667	0.01	0.921328
chr17	58835947	+	CG	0.833	0.875	0.688	0.882	1	0.8	0.798667	0.894	0.0953333	0.305049
chr17	58835948	-	CG	1	1	0.889	0.7	0.818	1	0.963	0.839333	-0.123667	0.292139
chr17	58836145	+	CG	0.909	1	0.857	1	0.929	1	0.922	0.976333	0.0543333	0.336326
chr17	58836146	-	CG	1	1	1	1	1	1	1	1	0	NA
chr17	58836210	+	CG	1	1	1	0.923	0.9	0.909	1	0.910667	-0.0893333	0.00556415
chr17	58836211	-	CG	1	1	0.875	1	0.889	1	0.958333	0.963	0.00466667	0.937335
chr17	58836374	+	CG	0.846	0.833	0.75	0.8	0.929	0.917	0.809667	0.882	0.0723333	0.235022
chr17	58836375	-	CG	0.75	0.667	1	1	0.571	0.889	0.805667	0.82	0.0143333	0.934364
chr17	58836403	+	CG	0.917	0.909	1	1	0.909	0.929	0.942	0.946	0.004	0.925369
chr17	58836404	-	CG	0.8	1	1	0.833	0.714	0.8	0.933333	0.782333	-0.151	0.137929
chr17	58836415	+	CG	1	1	0.941	1	1	1	0.980333	1	0.0196667	0.42265
chr17	58836416	-	CG	1	1	1	1	0.875	0.75	1	0.875	-0.125	0.225403
chr17	58836417	+	CG	1	1	0.941	0.857	1	1	0.980333	0.952333	-0.028	0.629252
chr17	58836418	-	CG	1	1	1	1	0.75	0.75	1	0.833333	-0.166667	0.183503
chr17	58836424	+	CG	1	1	0.944	0.929	0.889	0.867	0.981333	0.895	-0.0863333	0.0295194
chr17	58836425	-	CG	1	1	1	1	0.875	1	1	0.958333	-0.0416667	0.42265
chr17	58836439	+	CG	1	0.909	0.875	0.786	0.875	0.8	0.928	0.820333	-0.107667	0.0868382
chr17	58836440	-	CG	1	1	1	0.8	1	1	1	0.933333	-0.0666667	0.42265
chr17	58836451	+	CG	1	0.818	0.941	0.923	0.889	0.929	0.919667	0.913667	-0.006	0.922275
chr17	58836452	-	CG	0.833	1	0.889	1	0.833	1	0.907333	0.944333	0.037	0.644625
chr17	58836477	+	CG	1	0.778	0.889	0.929	0.818	0.917	0.889	0.888	-0.001	0.989918
chr17	58836478	-	CG	1	0.857	0.889	1	0.923	1	0.915333	0.974333	0.059	0.32006
chr17	58836501	+	CG	0.75	0.8	0.833	0.909	0.9	0.909	0.794333	0.906	0.111667	0.0417931
chr17	58836502	-	CG	0.833	1	0.846	0.909	0.75	1	0.893	0.886333	-0.00666667	0.94519
chr17	58836506	+	CG	1	1	0.833	1	1	1	0.944333	1	0.0556667	0.42265
chr17	58836507	-	CG	1	0.9	0.923	1	0.917	1	0.941	0.972333	0.0313333	0.48749
chr17	58836516	+	CG	1	1	0.944	0.9	0.9	0.909	0.981333	0.903	-0.0783333	0.0491477
chr17	58836517	-	CG	0.917	0.9	0.923	0.917	1	1	0.913333	0.972333	0.059	0.160193
chr17	58836521	+	CG	0.833	1	1	1	1	0.9	0.944333	0.966667	0.0223333	0.751648
chr17	58836522	-	CG	1	1	1	1	0.909	1	1	0.969667	-0.0303333	0.42265
chr17	58836530	+	CG	0.667	0.857	1	0.778	0.9	1	0.841333	0.892667	0.0513333	0.683824
chr17	58836531	-	CG	0.846	0.909	0.833	1	1	1	0.862667	1	0.137333	0.0279828
chr17	58836545	+	CG	0.75	0.833	0.875	1	1	0.9	0.819333	0.966667	0.147333	0.0416028
chr17	58836546	-	CG	0.923	1	0.75	0.667	0.9	1	0.891	0.855667	-0.0353333	0.789695
chr17	58836578	+	CG	0.571	1	0.647	0.833	0.833	0.833	0.739333	0.833	0.0936667	0.551981
chr17	58836579	-	CG	0.882	0.923	0.8	0.778	0.909	0.929	0.868333	0.872	0.00366667	0.954074
chr17	58836676	+	CG	0.333	1	0.286	0.667	0.556	0.875	0.539667	0.699333	0.159667	0.572357
chr17	58836677	-	CG	0.714	0.583	0.375	0.545	0.75	0.727	0.557333	0.674	0.116667	0.387219
chr17	58836803	+	CG	0.7	0.5	0.5	1	0.538	0.667	0.566667	0.735	0.168333	0.354173
chr17	58836804	-	CG	0.444	0.8	0.692	0.588	0.818	0.875	0.645333	0.760333	0.115	0.450285
chr17	58836838	+	CG	0.917	0.75	0.667	1	0.667	0.9	0.778	0.855667	0.0776667	0.564761
chr17	58836839	-	CG	0.5	0.625	0.75	0.706	0.846	0.9	0.625	0.817333	0.192333	0.109333
chr17	58837081	+	CG	0.6	0.286	0.1	0.4	0.667	0.75	0.328667	0.605667	0.277	0.205666
chr17	58837082	-	CG	0.667	1	0.4	0.3	0.333	0.4	0.689	0.344333	-0.344667	0.18238
chr17	58837092	+	CG	0.667	0.25	0.091	0.4	0.769	0.667	0.336	0.612	0.276	0.25884
chr17	58837093	-	CG	0.5	0.25	0.333	0.1	0.286	0.833	0.361	0.406333	0.0453333	0.860139
chr17	58837157	+	CG	0.091	0.286	0.067	0.273	0.5	0.545	0.148	0.439333	0.291333	0.0578771
chr17	58837158	-	CG	0.333	0.429	0	0.417	0.167	0.2	0.254	0.261333	0.00733333	0.964261
chr17	58837173	+	CG	0.636	0.643	0.333	0.455	0.778	0.727	0.537333	0.653333	0.116	0.463226
chr17	58837174	-	CG	0.5	0.625	0.286	0.583	0.571	0.4	0.470333	0.518	0.0476667	0.704927
chr17	58837175	+	CG	0.75	0.714	0.5	0.727	0.7	0.909	0.654667	0.778667	0.124	0.292595
chr17	58837176	-	CG	0.667	0.556	0.429	0.75	0.857	0.7	0.550667	0.769	0.218333	0.0664011
chr17	58837179	+	CG	0.538	0.286	0.231	0.364	0.333	0.455	0.351667	0.384	0.0323333	0.773697
chr17	58837180	-	CG	0.571	0.778	0.429	0.5	0.667	0.5	0.592667	0.555667	-0.037	0.769266
chr17	58837195	+	CG	0.286	0.25	0.214	0.5	0.556	0.167	0.25	0.407667	0.157667	0.322874
chr17	58837196	-	CG	0.222	0.5	0.286	0.182	0.583	0.556	0.336	0.440333	0.104333	0.541731
chr17	58837293	+	CG	0	0.077	0	0.182	0.091	0	0.0256667	0.091	0.0653333	0.347714
chr17	58837294	-	CG	0	0.4	0	0.167	0.294	0	0.133333	0.153667	0.0203333	0.904964
chr17	58837327	+	CG	0.417	0.077	0.231	0.231	0.417	0.214	0.241667	0.287333	0.0456667	0.720971
chr17	58837328	-	CG	0.231	0.5	0.125	0.429	0.529	0.375	0.285333	0.444333	0.159	0.28951
chr17	58837330	+	CG	0.167	0.143	0.077	0.077	0.333	0.247	0.129	0.219	0.09	0.356215
chr17	58837331	-	CG	0.308	0.25	0	0.429	0.529	0.143	0.186	0.367	0.181	0.294694
chr17	58837383	+	CG	0.2	0.067	0	0.1	0.2	0.143	0.089	0.147667	0.0586667	0.43826
chr17	58837384	-	CG	0.083	0.188	0	0	0.167	0.176	0.0903333	0.114333	0.024	0.776338
chr17	58837392	+	CG	0.2	0.2	0	0.111	0.125	0.077	0.133333	0.104333	-0.029	0.708866
chr17	58837393	-	CG	0.2	0.059	0	0.154	0.278	0.188	0.0863333	0.206667	0.120333	0.174056
chr17	58837426	+	CG	0.083	0	0	0	0.143	0	0.0276667	0.0476667	0.02	0.739282
chr17	58837427	-	CG	0	0	0	0	0	0.059	0	0.0196667	0.0196667	0.42265
chr17	58837466	+	CG	0.214	0	0.083	0	0.077	0	0.099	0.0256667	-0.0733333	0.365068
chr17	58837467	-	CG	0	0.077	0	0.143	0	0.1	0.0256667	0.081	0.0553333	0.338708
chr17	58837479	+	CG	0.286	0	0.083	0	0	0	0.123	0	-0.123	0.284614
chr17	58837480	-	CG	0	0	0.133	0.143	0.059	0.095	0.0443333	0.099	0.0546667	0.356438
chr17	58837481	+	CG	0.214	0	0.077	0.1	0	0.056	0.097	0.052	-0.045	0.563269
chr17	58837482	-	CG	0.071	0.091	0.133	0.357	0.294	0.095	0.0983333	0.248667	0.150333	0.192375
chr17	58837529	+	CG	0.25	0.059	0.071	0.111	0	0	0.126667	0.037	-0.0896667	0.294728
chr17	58837530	-	CG	0.077	0.273	0.176	0.071	0	0	0.175333	0.0236667	-0.151667	0.0999982
chr17	58837587	+	CG	0.143	0	0.071	0	0	0	0.0713333	0	-0.0713333	0.22613
chr17	58837588	-	CG	0	0	0	0.091	0	0	0	0.0303333	0.0303333	0.42265
chr17	58837631	+	CG	0	0	0.067	0	0	0	0.0223333	0	-0.0223333	0.42265
chr17	58837632	-	CG	0	0	0.062	0	0	0	0.0206667	0	-0.0206667	0.42265
chr17	58837641	+	CG	0	0	0	0	0	0	0	0	0	NA
chr17	58837642	-	CG	0.062	0.125	0.067	0	0	0	0.0846667	0	-0.0846667	0.0525685
chr17	58837666	+	CG	0.167	0	0	0.111	0.053	0.062	0.0556667	0.0753333	0.0196667	0.7638
chr17	58837667	-	CG	0	0	0	0	0	0	0	0	0	NA
chr17	58837690	+	CG	0	0	0	0.1	0	0.125	0	0.075	0.075	0.188497
chr17	58837691	-	CG	0.167	0	0	0.182	0	0.091	0.0556667	0.091	0.0353333	0.668429
chr17	58837697	+	CG	0	0	0	0.1	0	0	0	0.0333333	0.0333333	0.42265
chr17	58837698	-	CG	0	0	0	0	0	0	0	0	0	NA
chr17	58837710	+	CG	0	0	0	0	0	0	0	0	0	NA
chr17	58837711	-	CG	0	0	0	0	0	0	0	0	0	NA
chr17	58837714	+	CG	0	0	0	0	0	0	0	0	0	NA
chr17	58837715	-	CG	0	0.2	0	0	0.056	0	0.0666667	0.0186667	-0.048	0.551211
chr17	58837741	+	CG	0	0	0.056	0.091	0	0	0.0186667	0.0303333	0.0116667	0.762802
chr17	58837742	-	CG	0	0	0	0	0.071	0	0	0.0236667	0.0236667	0.42265
chr17	58837749	+	CG	0.083	0.05	0	0	0	0	0.0443333	0	-0.0443333	0.207533
chr17	58837750	-	CG	0	0	0	0	0	0	0	0	0	NA
chr17	58837762	+	CG	0	0	0	0	0	0	0	0	0	NA
chr17	58837763	-	CG	0	0	0.071	0	0	0	0.0236667	0	-0.0236667	0.42265
chr17	58837796	+	CG	0	0	0	0	0	0	0	0	0	NA
chr17	58837797	-	CG	0	0	0	0	0	0	0	0	0	NA
chr17	58837802	+	CG	0	0	0	0	0	0	0	0	0	NA
chr17	58837803	-	CG	0.083	0	0	0	0	0	0.0276667	0	-0.0276667	0.42265
chr17	58837819	+	CG	0	0	0	0	0	0	0	0	0	NA
chr17	58837820	-	CG	0	0	0	0	0	0	0	0	0	NA
chr17	58837821	+	CG	0.05	0	0	0	0	0	0.0166667	0	-0.0166667	0.42265
chr17	58837822	-	CG	0	0	0	0	0	0	0	0	0	NA
chr17	58837831	+	CG	0	0	0	0	0	0	0	0	0	NA
chr17	58837832	-	CG	0	0	0.062	0	0	0	0.0206667	0	-0.0206667	0.42265
chr17	58837864	+	CG	0	0	0	0.062	0	0	0	0.0206667	0.0206667	0.42265
chr17	58837865	-	CG	0	0	0	0	0.083	0	0	0.0276667	0.0276667	0.42265
chr17	58837882	+	CG	0.048	0	0	0	0	0	0.016	0	-0.016	0.42265
chr17	58837883	-	CG	0.125	0	0	0	0	0	0.0416667	0	-0.0416667	0.42265
chr17	58837884	+	CG	0	0	0	0	0	0	0	0	0	NA
chr17	58837885	-	CG	0	0	0	0	0	0	0	0	0	NA
chr17	58837903	+	CG	0	0	0	0	0	0	0	0	0	NA
chr17	58837904	-	CG	0	0	0	0	0	0	0	0	0	NA
chr17	58837905	+	CG	0	0	0	0	0	0	0	0	0	NA
chr17	58837906	-	CG	0	0	0.077	0	0	0	0.0256667	0	-0.0256667	0.42265
chr17	58837912	+	CG	0	0	0	0	0	0.062	0	0.0206667	0.0206667	0.42265
chr17	58837913	-	CG	0	0	0	0	0	0	0	0	0	NA
chr17	58837942	+	CG	0	0	0	0	0	0	0	0	0	NA
chr17	58837943	-	CG	0	0	0	0	0	0	0	0	0	NA
chr17	58837950	+	CG	0	0.053	0	0	0	0	0.0176667	0	-0.0176667	0.42265
chr17	58837951	-	CG	0	0	0	0	0	0	0	0	0	NA
chr17	58837955	+	CG	0	0	0	0	0	0	0	0	0	NA
chr17	58837956	-	CG	0	0	0	0	0	0	0	0	0	NA
chr17	58837979	+	CG	0	0.059	0	0	0	0	0.0196667	0	-0.0196667	0.42265
chr17	58837980	-	CG	0.167	0	0	0	0	0	0.0556667	0	-0.0556667	0.42265
chr17	58838003	+	CG	0	0	0	0	0	0	0	0	0	NA
chr17	58838004	-	CG	0	0	0	0	0	0	0	0	0	NA
chr17	58838007	+	CG	0	0	0	0	0	0	0	0	0	NA
chr17	58838008	-	CG	0	0	0	0	0	0	0	0	0	NA
chr17	58838017	+	CG	0	0	0	0	0	0	0	0	0	NA
chr17	58838018	-	CG	0	0	0	0	0	0	0	0	0	NA
chr17	58838026	+	CG	0	0	0	0	0	0	0	0	0	NA
chr17	58838027	-	CG	0	0	0	0	0	0	0	0	0	NA
chr17	58838029	+	CG	0	0	0	0	0	0	0	0	0	NA
chr17	58838030	-	CG	0	0	0	0	0	0	0	0	0	NA
chr17	58838037	+	CG	0	0	0	0	0	0	0	0	0	NA
chr17	58838038	-	CG	0	0	0	0	0	0.083	0	0.0276667	0.0276667	0.42265
chr17	58838043	+	CG	0	0	0.083	0	0	0	0.0276667	0	-0.0276667	0.42265
chr17	58838044	-	CG	0	0	0	0	0	0	0	0	0	NA
chr17	58838061	+	CG	0	0	0	0	0	0	0	0	0	NA
chr17	58838062	-	CG	0	0	0	0	0	0	0	0	0	NA
chr17	58838065	+	CG	0	0	0	0	0	0	0	0	0	NA
chr17	58838066	-	CG	0	0	0	0	0	0	0	0	0	NA
chr17	58838071	+	CG	0	0	0	0.091	0	0	0	0.0303333	0.0303333	0.42265
chr17	58838072	-	CG	0	0	0	0	0	0	0	0	0	NA
chr17	58838085	+	CG	0	0	0	0	0	0	0	0	0	NA
chr17	58838086	-	CG	0	0	0	0	0	0	0	0	0	NA
chr17	58838093	+	CG	0	0	0	0.1	0	0	0	0.0333333	0.0333333	0.42265
chr17	58838094	-	CG	0	0	0	0	0	0	0	0	0	NA
chr17	58838111	+	CG	0	0	0	0	0	0	0	0	0	NA
chr17	58838112	-	CG	0	0	0	0	0	0	0	0	0	NA
chr17	58838128	+	CG	0	0	0	0	0	0	0	0	0	NA
chr17	58838129	-	CG	0	0	0	0	0	0	0	0	0	NA
chr17	58838165	+	CG	0	0	0	0	0	0	0	0	0	NA
chr17	58838166	-	CG	0	0	0	0	0	0	0	0	0	NA
chr17	58838189	+	CG	0	0	0	0.111	0	0	0	0.037	0.037	0.42265
chr17	58838190	-	CG	0	0.083	0	0	0.091	0	0.0276667	0.0303333	0.00266667	0.951353
chr17	58838193	+	CG	0	0	0	0	0	0	0	0	0	NA
chr17	58838194	-	CG	0	0	0	0	0	0	0	0	0	NA
chr17	58838196	+	CG	0	0	0	0	0	0	0	0	0	NA
chr17	58838197	-	CG	0	0.077	0	0.067	0	0	0.0256667	0.0223333	-0.00333333	0.926752
chr17	58838210	+	CG	0	0	0	0.143	0	0	0	0.0476667	0.0476667	0.42265
chr17	58838211	-	CG	0	0.059	0	0	0	0	0.0196667	0	-0.0196667	0.42265
chr17	58838217	+	CG	0	0	0	0	0	0	0	0	0	NA
chr17	58838218	-	CG	0	0.056	0	0	0	0	0.0186667	0	-0.0186667	0.42265
chr17	58838219	+	CG	0	0	0.062	0	0	0	0.0206667	0	-0.0206667	0.42265
chr17	58838220	-	CG	0	0	0	0	0	0	0	0	0	NA
chr17	58838227	+	CG	0	0	0	0	0	0.125	0	0.0416667	0.0416667	0.42265
chr17	58838228	-	CG	0	0	0	0	0	0	0	0	0	NA
chr17	58838229	+	CG	0	0	0	0	0	0	0	0	0	NA
chr17	58838230	-	CG	0	0	0	0	0	0	0	0	0	NA
chr17	58838232	+	CG	0	0.167	0	0	0	0	0.0556667	0	-0.0556667	0.42265
chr17	58838233	-	CG	0	0	0	0.062	0	0	0	0.0206667	0.0206667	0.42265
chr17	58838235	+	CG	0	0	0	0	0	0	0	0	0	NA
chr17	58838236	-	CG	0	0	0	0	0	0	0	0	0	NA
chr17	58838240	+	CG	0	0	0	0	0	0	0	0	0	NA
chr17	58838241	-	CG	0	0	0	0	0	0	0	0	0	NA
chr17	58838246	+	CG	0	0	0	0	0	0	0	0	0	NA
chr17	58838247	-	CG	0	0	0	0	0	0	0	0	0	NA
chr17	58838259	+	CG	0	0	0	0	0	0	0	0	0	NA
chr17	58838260	-	CG	0	0	0	0	0	0	0	0	0	NA
chr17	58838263	+	CG	0	0	0	0	0	0	0	0	0	NA
chr17	58838264	-	CG	0	0	0	0	0	0	0	0	0	NA
chr17	58838270	+	CG	0	0	0	0	0	0	0	0	0	NA
chr17	58838271	-	CG	0	0	0	0	0	0	0	0	0	NA
chr17	58838277	+	CG	0	0	0	0	0	0	0	0	0	NA
chr17	58838278	-	CG	0	0	0	0	0	0	0	0	0	NA
chr17	58838281	+	CG	0	0	0	0	0	0	0	0	0	NA
chr17	58838282	-	CG	0	0	0	0	0	0	0	0	0	NA
chr17	58838283	+	CG	0	0	0	0	0	0	0	0	0	NA
chr17	58838284	-	CG	0	0	0	0	0	0	0	0	0	NA
chr17	58838291	+	CG	0	0	0	0	0	0	0	0	0	NA
chr17	58838292	-	CG	0	0	0.038	0	0	0	0.0126667	0	-0.0126667	0.42265
chr17	58838293	+	CG	0	0	0	0	0	0	0	0	0	NA
chr17	58838294	-	CG	0.083	0	0	0	0	0	0.0276667	0	-0.0276667	0.42265
chr17	58838297	+	CG	0	0	0	0	0	0	0	0	0	NA
chr17	58838298	-	CG	0	0	0	0	0	0	0	0	0	NA
chr17	58838301	+	CG	0	0	0	0	0	0	0	0	0	NA
chr17	58838302	-	CG	0.071	0	0	0	0	0	0.0236667	0	-0.0236667	0.42265
chr17	58838312	+	CG	0	0	0	0	0	0	0	0	0	NA
chr17	58838313	-	CG	0	0.05	0	0	0	0	0.0166667	0	-0.0166667	0.42265
chr17	58838332	+	CG	0	0	0	0	0	0	0	0	0	NA
chr17	58838333	-	CG	0	0	0	0	0.048	0	0	0.016	0.016	0.42265
chr17	58838336	+	CG	0	0	0	0	0	0	0	0	0	NA
chr17	58838337	-	CG	0	0	0	0	0	0	0	0	0	NA
chr17	58838352	+	CG	0	0	0	0	0	0	0	0	0	NA
chr17	58838353	-	CG	0	0	0	0	0	0	0	0	0	NA
chr17	58838364	+	CG	0	0	0	0	0	0	0	0	0	NA
chr17	58838365	-	CG	0	0	0	0	0	0	0	0	0	NA
chr17	58838369	+	CG	0	0	0	0	0	0	0	0	0	NA
chr17	58838370	-	CG	0	0.053	0	0	0	0	0.0176667	0	-0.0176667	0.42265
chr17	58838373	+	CG	0	0	0	0	0	0	0	0	0	NA
chr17	58838374	-	CG	0	0	0	0	0	0	0	0	0	NA
chr17	58838375	+	CG	0	0	0	0	0	0	0	0	0	NA
chr17	58838376	-	CG	0	0.056	0	0	0	0	0.0186667	0	-0.0186667	0.42265
chr17	58838391	+	CG	0	0	0	0	0	0	0	0	0	NA
chr17	58838392	-	CG	0	0	0	0.071	0	0	0	0.0236667	0.0236667	0.42265
chr17	58838400	+	CG	0	0	0	0	0	0	0	0	0	NA
chr17	58838401	-	CG	0	0	0	0	0	0	0	0	0	NA
chr17	58838423	+	CG	0	0	0	0	0	0	0	0	0	NA
chr17	58838424	-	CG	0	0	0	0	0	0	0	0	0	NA
chr17	58838437	+	CG	0	0	0.091	0	0	0	0.0303333	0	-0.0303333	0.42265
chr17	58838438	-	CG	0	0	0	0	0	0.048	0	0.016	0.016	0.42265
chr17	58838470	+	CG	0	0	0	0	0	0	0	0	0	NA
chr17	58838471	-	CG	0	0	0	0	0	0	0	0	0	NA
chr17	58838473	+	CG	0	0	0	0	0	0	0	0	0	NA
chr17	58838474	-	CG	0	0	0	0	0	0	0	0	0	NA
chr17	58838535	+	CG	0	0	0	0	0	0	0	0	0	NA
chr17	58838536	-	CG	0	0	0	0	0.083	0	0	0.0276667	0.0276667	0.42265
chr17	58838546	+	CG	0	0	0	0	0	0	0	0	0	NA
chr17	58838547	-	CG	0	0	0	0	0	0	0	0	0	NA
chr17	58838549	+	CG	0	0	0	0	0	0	0	0	0	NA
chr17	58838550	-	CG	0	0	0	0	0	0	0	0	0	NA
chr17	58838557	+	CG	0	0	0	0	0	0	0	0	0	NA
chr17	58838558	-	CG	0	0	0	0	0	0	0	0	0	NA
chr17	58838560	+	CG	0	0	0	0	0	0	0	0	0	NA
chr17	58838561	-	CG	0	0	0	0	0	0	0	0	0	NA
chr17	58838568	+	CG	0	0	0	0	0	0	0	0	0	NA
chr17	58838569	-	CG	0	0	0	0	0	0	0	0	0	NA
chr17	58838575	+	CG	0	0	0	0	0	0	0	0	0	NA
chr17	58838576	-	CG	0	0	0	0	0	0	0	0	0	NA
chr17	58838580	+	CG	0	0	0	0	0	0	0	0	0	NA
chr17	58838581	-	CG	0	0	0	0	0	0	0	0	0	NA
chr17	58838582	+	CG	0	0	0	0	0	0	0	0	0	NA
chr17	58838583	-	CG	0	0	0	0	0	0	0	0	0	NA
chr17	58838588	+	CG	0	0	0	0	0	0	0	0	0	NA
chr17	58838589	-	CG	0	0	0	0	0	0	0	0	0	NA
chr17	58838599	+	CG	0	0	0	0	0	0	0	0	0	NA
chr17	58838600	-	CG	0	0	0	0	0	0	0	0	0	NA
chr17	58838601	+	CG	0	0	0	0	0	0	0	0	0	NA
chr17	58838602	-	CG	0.1	0	0.056	0	0	0	0.052	0	-0.052	0.214163
chr17	58838603	+	CG	0	0	0	0	0	0	0	0	0	NA
chr17	58838604	-	CG	0	0	0	0	0	0	0	0	0	NA
chr17	58838605	+	CG	0	0	0	0	0	0	0	0	0	NA
chr17	58838606	-	CG	0	0	0	0	0	0.053	0	0.0176667	0.0176667	0.42265
chr17	58838613	+	CG	0	0	0	0	0	0	0	0	0	NA
chr17	58838614	-	CG	0	0	0	0	0	0	0	0	0	NA
chr17	58838615	+	CG	0	0	0	0	0	0	0	0	0	NA
chr17	58838616	-	CG	0	0	0	0	0	0	0	0	0	NA
chr17	58838618	+	CG	0	0	0	0	0	0	0	0	0	NA
chr17	58838619	-	CG	0	0	0	0	0	0.062	0	0.0206667	0.0206667	0.42265
chr17	58838622	+	CG	0	0	0	0	0	0	0	0	0	NA
chr17	58838623	-	CG	0	0	0	0	0	0	0	0	0	NA
chr17	58838626	+	CG	0	0	0	0	0	0	0	0	0	NA
chr17	58838627	-	CG	0	0	0	0	0	0	0	0	0	NA
chr17	58838630	+	CG	0	0	0	0	0	0	0	0	0	NA
chr17	58838631	-	CG	0	0	0	0	0	0	0	0	0	NA
chr17	58838643	+	CG	0	0	0	0	0	0	0	0	0	NA
chr17	58838644	-	CG	0	0	0	0	0	0	0	0	0	NA
chr17	58838646	+	CG	0.062	0	0	0	0	0	0.0206667	0	-0.0206667	0.42265
chr17	58838647	-	CG	0	0	0	0	0	0	0	0	0	NA
chr17	58838652	+	CG	0	0	0	0	0	0	0	0	0	NA
chr17	58838653	-	CG	0	0	0	0	0	0	0	0	0	NA
chr17	58838666	+	CG	0	0	0	0	0.083	0	0	0.0276667	0.0276667	0.42265
chr17	58838667	-	CG	0	0	0	0	0	0	0	0	0	NA
chr17	58838694	+	CG	0.067	0	0	0	0	0	0.0223333	0	-0.0223333	0.42265
chr17	58838695	-	CG	0	0	0	0	0	0.062	0	0.0206667	0.0206667	0.42265
chr17	58838706	+	CG	0	0	0	0	0	0	0	0	0	NA
chr17	58838707	-	CG	0	0	0	0	0	0	0	0	0	NA
chr17	58838708	+	CG	0	0	0	0	0	0	0	0	0	NA
chr17	58838709	-	CG	0	0	0	0	0	0	0	0	0	NA
chr17	58838719	+	CG	0	0	0.2	0	0	0	0.0666667	0	-0.0666667	0.42265
chr17	58838720	-	CG	0	0	0	0	0	0	0	0	0	NA
chr17	58838732	+	CG	0	0	0	0	0	0	0	0	0	NA
chr17	58838733	-	CG	0	0	0	0	0	0	0	0	0	NA
chr17	58838768	+	CG	0	0	0	0	0	0	0	0	0	NA
chr17	58838769	-	CG	0	0	0	0	0	0	0	0	0	NA
chr17	58838781	+	CG	0	0	0	0.083	0	0	0	0.0276667	0.0276667	0.42265
chr17	58838782	-	CG	0	0	0	0	0	0	0	0	0	NA
chr17	58838787	+	CG	0	0	0	0	0	0	0	0	0	NA
chr17	58838788	-	CG	0	0	0	0	0	0	0	0	0	NA
chr17	58838799	+	CG	0	0	0	0	0	0	0	0	0	NA
chr17	58838800	-	CG	0	0	0	0	0	0	0	0	0	NA
chr17	58838820	+	CG	0	0	0	0	0	0	0	0	0	NA
chr17	58838821	-	CG	0	0	0	0	0	0	0	0	0	NA
chr17	58838825	+	CG	0	0	0	0	0	0	0	0	0	NA
chr17	58838826	-	CG	0	0	0	0	0	0	0	0	0	NA
chr17	58838827	+	CG	0	0	0	0	0	0	0	0	0	NA
chr17	58838828	-	CG	0	0	0	0	0	0	0	0	0	NA
chr17	58838831	+	CG	0	0	0	0	0	0	0	0	0	NA
chr17	58838832	-	CG	0	0	0	0	0	0	0	0	0	NA
chr17	58838838	+	CG	0	0	0	0	0	0	0	0	0	NA
chr17	58838839	-	CG	0	0	0	0	0	0	0	0	0	NA
chr17	58838847	+	CG	0	0	0.1	0	0	0	0.0333333	0	-0.0333333	0.42265
chr17	58838848	-	CG	0	0	0	0	0	0	0	0	0	NA
chr17	58838849	+	CG	0	0	0.091	0	0	0	0.0303333	0	-0.0303333	0.42265
chr17	58838850	-	CG	0	0	0	0	0	0	0	0	0	NA
chr17	58838858	+	CG	0	0	0	0	0	0	0	0	0	NA
chr17	58838859	-	CG	0	0	0	0	0	0	0	0	0	NA
chr17	58838863	+	CG	0	0	0	0	0	0	0	0	0	NA
chr17	58838864	-	CG	0	0	0	0	0	0	0	0	0	NA
chr17	58838866	+	CG	0	0	0	0	0	0	0	0	0	NA
chr17	58838867	-	CG	0	0	0	0	0	0.143	0	0.0476667	0.0476667	0.42265
chr17	58838882	+	CG	0	0	0	0	0	0	0	0	0	NA
chr17	58838883	-	CG	0	0	0	0	0	0	0	0	0	NA
chr17	58838890	+	CG	0	0	0	0	0	0	0	0	0	NA
chr17	58838891	-	CG	0	0	0	0	0	0	0	0	0	NA
chr17	58838898	+	CG	0	0	0	0	0	0	0	0	0	NA
chr17	58838899	-	CG	0	0	0	0	0	0	0	0	0	NA
chr17	58838904	+	CG	0	0	0	0	0	0	0	0	0	NA
chr17	58838905	-	CG	0	0	0	0	0	0	0	0	0	NA
chr17	58838913	+	CG	0	0	0	0	0	0	0	0	0	NA
chr17	58838914	-	CG	0	0	0	0	0	0	0	0	0	NA
chr17	58838919	+	CG	0	0	0	0	0	0	0	0	0	NA
chr17	58838920	-	CG	0	0	0	0	0	0	0	0	0	NA
chr17	58838924	+	CG	0	0	0.143	0	0	0	0.0476667	0	-0.0476667	0.42265
chr17	58838925	-	CG	0	0	0	0	0	0	0	0	0	NA
chr17	58838926	+	CG	0	0	0	0	0	0	0	0	0	NA
chr17	58838927	-	CG	0	0	0	0	0	0	0	0	0	NA
chr17	58838932	+	CG	0	0	0	0	0	0	0	0	0	NA
chr17	58838933	-	CG	0	0	0	0	0	0	0	0	0	NA
chr17	58838937	+	CG	0	0.125	0	0	0	0	0.0416667	0	-0.0416667	0.42265
chr17	58838938	-	CG	0	0	0	0	0	0	0	0	0	NA
chr17	58838947	+	CG	0	0	0	0	0	0.111	0	0.037	0.037	0.42265
chr17	58838948	-	CG	0	0	0	0	0	0	0	0	0	NA
chr17	58838949	+	CG	0	0	0	0	0	0	0	0	0	NA
chr17	58838950	-	CG	0	0	0	0	0	0	0	0	0	NA
chr17	58838951	+	CG	0	0	0	0	0	0	0	0	0	NA
chr17	58838952	-	CG	0	0	0	0	0	0	0	0	0	NA
chr17	58838965	+	CG	0	0	0	0	0	0	0	0	0	NA
chr17	58838966	-	CG	0	0	0	0	0	0	0	0	0	NA
chr17	58838983	+	CG	0	0	0	0	0	0	0	0	0	NA
chr17	58838984	-	CG	0	0	0.083	0	0	0	0.0276667	0	-0.0276667	0.42265
chr17	58838988	+	CG	0	0	0	0	0	0.1	0	0.0333333	0.0333333	0.42265
chr17	58838989	-	CG	0	0	0	0	0	0	0	0	0	NA
chr17	58838994	+	CG	0	0	0	0	0	0	0	0	0	NA
chr17	58838995	-	CG	0	0	0	0	0	0	0	0	0	NA
chr17	58839019	+	CG	0	0	0	0	0	0	0	0	0	NA
chr17	58839020	-	CG	0	0	0	0	0	0	0	0	0	NA
chr17	58839037	+	CG	0	0	0	0	0	0	0	0	0	NA
chr17	58839038	-	CG	0	0	0	0	0	0	0	0	0	NA
chr17	58839042	+	CG	0	0	0	0	0	0	0	0	0	NA
chr17	58839043	-	CG	0	0	0	0	0	0	0	0	0	NA
chr17	58839047	+	CG	0	0	0	0	0	0	0	0	0	NA
chr17	58839048	-	CG	0	0	0	0	0	0	0	0	0	NA
chr17	58839055	+	CG	0	0	0	0.2	0	0	0	0.0666667	0.0666667	0.42265
chr17	58839056	-	CG	0	0	0	0	0	0	0	0	0	NA
chr17	58839070	+	CG	0	0	0	0	0	0	0	0	0	NA
chr17	58839071	-	CG	0	0	0	0	0	0	0	0	0	NA
chr17	58839092	+	CG	0	0	0	0	0	0	0	0	0	NA
chr17	58839093	-	CG	0	0	0	0	0	0	0	0	0	NA
chr17	58839101	+	CG	0	0	0	0	0	0	0	0	0	NA
chr17	58839102	-	CG	0	0.167	0	0	0	0	0.0556667	0	-0.0556667	0.42265
chr17	58839109	+	CG	0	0	0	0	0	0	0	0	0	NA
chr17	58839110	-	CG	0	0	0	0	0	0	0	0	0	NA
chr17	58839116	+	CG	0	0	0	0.25	0	0	0	0.0833333	0.0833333	0.42265
chr17	58839117	-	CG	0	0	0	0	0	0	0	0	0	NA
chr17	58839119	+	CG	0	0	0.125	0	0	0	0.0416667	0	-0.0416667	0.42265
chr17	58839120	-	CG	0	0	0	0	0	0	0	0	0	NA
chr17	58839121	+	CG	0	0	0.125	0	0	0	0.0416667	0	-0.0416667	0.42265
chr17	58839122	-	CG	0	0	0	0	0	0	0	0	0	NA
chr17	58839125	+	CG	0	0	0.125	0	0	0.333	0.0416667	0.111	0.0693333	0.606303
chr17	58839126	-	CG	0.143	0	0	0	0	0	0.0476667	0	-0.0476667	0.42265
chr17	58839131	+	CG	0	0	0.125	0	0	0	0.0416667	0	-0.0416667	0.42265
chr17	58839132	-	CG	0	0	0	0	0	0	0	0	0	NA
chr17	58839149	+	CG	0	0	0	0	0	0	0	0	0	NA
chr17	58839150	-	CG	0	0	0	0	0	0	0	0	0	NA
chr17	58839151	+	CG	0	0	0	0	0	0	0	0	0	NA
chr17	58839152	-	CG	0	0	0.083	0	0.333	0	0.0276667	0.111	0.0833333	0.53471
chr17	58839159	+	CG	0	0	0	0	0.167	0	0	0.0556667	0.0556667	0.42265
chr17	58839160	-	CG	0	0	0	0	0	0	0	0	0	NA
chr17	58839172	+	CG	0	0	0	0	0	0	0	0	0	NA
chr17	58839173	-	CG	0	0	0	0	0	0	0	0	0	NA
chr17	58839179	+	CG	0	0	0	0	0	0	0	0	0	NA
chr17	58839180	-	CG	0	0	0	0	0	0	0	0	0	NA
chr17	58839187	+	CG	0	0	0	0	0	0	0	0	0	NA
chr17	58839188	-	CG	0	0	0.091	0	0	0	0.0303333	0	-0.0303333	0.42265
chr17	58839206	+	CG	0	0	0	0	0	0	0	0	0	NA
chr17	58839207	-	CG	0	0	0	0	0	0	0	0	0	NA
chr17	58839212	+	CG	0	0	0	1	0	0	0	0.333333	0.333333	0.42265
chr17	58839213	-	CG	0	0	0	0	0	0	0	0	0	NA
chr17	58839226	+	CG	0	0	0	0	0	0	0	0	0	NA
chr17	58839227	-	CG	0	0	0	0	0	0	0	0	0	NA
chr17	58839232	+	CG	0	0	0	0	0	0	0	0	0	NA
chr17	58839233	-	CG	0	0	0	0	0	0	0	0	0	NA
chr17	58839237	+	CG	0	0	0	0	0	0	0	0	0	NA
chr17	58839238	-	CG	0	0	0	0	0	0	0	0	0	NA
chr17	58839243	+	CG	0	0	0	0	0	0	0	0	0	NA
chr17	58839244	-	CG	0	0	0	0	0	0	0	0	0	NA
chr17	58839252	-	CG	0	0	0	0	0	0	0	0	0	NA
chr17	58839257	-	CG	0	0	0	0	0	0	0	0	0	NA
chr17	58839263	-	CG	0	0	0	0	0	0	0	0	0	NA
chr17	58839266	-	CG	0	0	0	0	0	0	0	0	0	NA
chr17	58839272	-	CG	0	0	0	0	0	0	0	0	0	NA
chr17	58839274	-	CG	0.25	0	0	0	0	0	0.0833333	0	-0.0833333	0.42265
chr17	58839291	-	CG	0	0	0	0	0	0	0	0	0	NA
chr17	58839293	-	CG	0	0.143	0	0	0	0	0.0476667	0	-0.0476667	0.42265
chr17	58839326	-	CG	0	0	0	0	0	0	0	0	0	NA
chr17	58839337	-	CG	0	0	0	0	0	0	0	0	0	NA
chr17	58839345	-	CG	0	0	0	0	0	0	0	0	0	NA
chr17	58839406	-	CG	0	0	0	0	0	0	0	0	0	NA
chr17	58839415	-	CG	0	0	0.25	0	0	0	0.0833333	0	-0.0833333	0.42265
chr17	58839419	-	CG	0	1	0.2	0	0	0	0.4	0	-0.4	0.320634
chr17	58839428	-	CG	0	0	0	0	0	0	0	0	0	NA
chr17	58839437	-	CG	0.333	0	0	0	0	0.5	0.111	0.166667	0.0556667	0.796726
chr17	58839449	+	CG	0	0	0	0	0	0	0	0	0	NA
chr17	58839450	-	CG	0	0	0	0	0	0	0	0	0	NA
chr17	58839452	+	CG	0	0	0	0	0	0	0	0	0	NA
chr17	58839453	-	CG	0	0	0	0	0	0	0	0	0	NA
chr17	58839454	+	CG	0	0	0	0	0	0	0	0	0	NA
chr17	58839463	+	CG	0	0	0	0	0	0	0	0	0	NA
chr17	58839464	-	CG	0	0	0	0	0	0	0	0	0	NA
chr17	58839573	+	CG	0	0	0	0	0	0	0	0	0	NA
chr17	58839574	-	CG	0	0	0	0	0	0	0	0	0	NA
chr17	58839577	+	CG	0	0	0	0	0	0	0	0	0	NA
chr17	58839578	-	CG	0	0	0	0	0	0	0	0	0	NA
chr17	58839579	+	CG	0	0	0	0	0	0	0	0	0	NA
chr17	58839580	-	CG	0	0	0	0	0	0	0	0	0	NA
chr17	58839584	+	CG	0	0	0	0	0	0	0	0	0	NA
chr17	58839585	-	CG	0	0	0	0	0.2	0	0	0.0666667	0.0666667	0.42265
chr17	58839587	+	CG	0	0	0	0	0	0	0	0	0	NA
chr17	58839588	-	CG	0	0	0	0	0	0	0	0	0	NA
chr17	58839601	+	CG	0	0	0	0	0	0	0	0	0	NA
chr17	58839602	-	CG	0	0	0	0	0	0	0	0	0	NA
chr17	58839607	+	CG	0	0	0	0	0	0	0	0	0	NA
chr17	58839608	-	CG	0	0	0	0	0	0	0	0	0	NA
chr17	58839624	+	CG	0	0	0	0	0	0	0	0	0	NA
chr17	58839625	-	CG	0	0	0	0	0	0	0	0	0	NA
chr17	58839656	+	CG	0	0	0	0	0	0	0	0	0	NA
chr17	58839657	-	CG	0	0	0	0	0	0	0	0	0	NA
chr17	58839658	+	CG	0	0	0	0	0	0	0	0	0	NA
chr17	58839659	-	CG	0	0	0	0	0	0	0	0	0	NA
chr17	58839660	+	CG	0	0	0	0	0	0	0	0	0	NA
chr17	58839661	-	CG	0	0	0	0	0	0	0	0	0	NA
chr17	58839662	+	CG	0	0	0	0	0	0	0	0	0	NA
chr17	58839663	-	CG	0	0	0	0	0	0	0	0	0	NA
chr17	58839667	+	CG	0	0	0	0	0	0	0	0	0	NA
chr17	58839668	-	CG	0	0	0	0	0	0	0	0	0	NA
chr17	58839675	+	CG	0	0	0	0	0	0	0	0	0	NA
chr17	58839676	-	CG	0	0	0	0	0	0	0	0	0	NA
chr17	58839678	+	CG	0	0	0	0	0	0	0	0	0	NA
chr17	58839679	-	CG	0	0	0	0	0	0.25	0	0.0833333	0.0833333	0.42265
chr17	58839704	+	CG	0	0	0	0	0	0	0	0	0	NA
chr17	58839705	-	CG	0	0	0	0	0	0	0	0	0	NA
chr17	58839708	+	CG	0	0	0	0	0	0	0	0	0	NA
chr17	58839709	-	CG	0	0	0	0	0	0	0	0	0	NA
chr17	58839726	+	CG	0	0	0.143	0	0	0	0.0476667	0	-0.0476667	0.42265
chr17	58839727	-	CG	0	0	0	0	0	0	0	0	0	NA
chr17	58839728	+	CG	0	0	0.143	0	0	0	0.0476667	0	-0.0476667	0.42265
chr17	58839729	-	CG	0	0	0	0	0	0	0	0	0	NA
chr17	58839756	+	CG	0	0	0.167	0	0	0	0.0556667	0	-0.0556667	0.42265
chr17	58839757	-	CG	0	0	0	0	0	0	0	0	0	NA
chr17	58839767	+	CG	0	0	0	0	0	0	0	0	0	NA
chr17	58839768	-	CG	0	0	0	0	0	0	0	0	0	NA
chr17	58839773	+	CG	0	0	0	0	0	0	0	0	0	NA
chr17	58839774	-	CG	0	0	0	0	0	0	0	0	0	NA
chr17	58839790	+	CG	0	0	0	0	0	0	0	0	0	NA
chr17	58839791	-	CG	0	0	0	0	0	0	0	0	0	NA
chr17	58839798	+	CG	0	0	0	0	0	0.125	0	0.0416667	0.0416667	0.42265
chr17	58839799	-	CG	0	0	0.5	0	0	0	0.166667	0	-0.166667	0.42265
chr17	58839804	+	CG	0	0	0	0	0	0	0	0	0	NA
chr17	58839805	-	CG	0	0.167	0	0	0	0	0.0556667	0	-0.0556667	0.42265
chr17	58839836	+	CG	0	0	0	0	0	0	0	0	0	NA
chr17	58839837	-	CG	0	0	0	0	0	0	0	0	0	NA
chr17	58839840	+	CG	0	0	0	0	0	0	0	0	0	NA
chr17	58839841	-	CG	0	0	0	0	0	0	0	0	0	NA
chr17	58839846	+	CG	0	0	0	0	0	0	0	0	0	NA
chr17	58839847	-	CG	0	0	0	0	0	0.25	0	0.0833333	0.0833333	0.42265
chr17	58839857	+	CG	0	0	0	0	0	0	0	0	0	NA
chr17	58839858	-	CG	0	0	0	0	0	0	0	0	0	NA
chr17	58839867	+	CG	0	0	0	0	0	0	0	0	0	NA
chr17	58839868	-	CG	0	0	0	0	0	0	0	0	0	NA
chr17	58839872	+	CG	0	0	0	0	0	0	0	0	0	NA
chr17	58839873	-	CG	0	0	0	0	0	0	0	0	0	NA
chr17	58839874	+	CG	0	0	0	0	0	0	0	0	0	NA
chr17	58839875	-	CG	0	0	0	0	0	0	0	0	0	NA
chr17	58839878	+	CG	0	0.333	0.167	0	0	0	0.166667	0	-0.166667	0.225094
chr17	58839879	-	CG	0	0	0	0	0	0	0	0	0	NA
chr17	58839885	+	CG	0	0.333	0	0	0	0	0.111	0	-0.111	0.42265
chr17	58839886	-	CG	0	0	0	0	0	0	0	0	0	NA
chr17	58839909	+	CG	0	0	0	0	0	0	0	0	0	NA
chr17	58839910	-	CG	0	0	0	0	0	0	0	0	0	NA
chr17	58839911	+	CG	0.091	0	0	0	0.25	0	0.0303333	0.0833333	0.053	0.599439
chr17	58839912	-	CG	0	0	0	0	0	0	0	0	0	NA
chr17	58839915	+	CG	0	0	0	0	0	0	0	0	0	NA
chr17	58839916	-	CG	0	0	0	0	0	0	0	0	0	NA
chr17	58839920	+	CG	0	0	0	0	0	0	0	0	0	NA
chr17	58839921	-	CG	0	0	0	0	0	0	0	0	0	NA
chr17	58839925	+	CG	0	0	0	0	0	0	0	0	0	NA
chr17	58839926	-	CG	0	0	0	0	0	0	0	0	0	NA
chr17	58839942	+	CG	0	0	0	0	0	0	0	0	0	NA
chr17	58839943	-	CG	0	0	0	0	0	0	0	0	0	NA
chr17	58839945	+	CG	0	0	0	0	0	0	0	0	0	NA
chr17	58839946	-	CG	0	0	0	0	0	0	0	0	0	NA
chr17	58839959	+	CG	0	0	0	0	0	0	0	0	0	NA
chr17	58839960	-	CG	0	0	0	0	0	0	0	0	0	NA
chr17	58839961	+	CG	0	0	0	0	0	0	0	0	0	NA
chr17	58839962	-	CG	0	0	0	0	0	0	0	0	0	NA
chr17	58839968	+	CG	0	0	0	0	0	0	0	0	0	NA
chr17	58839969	-	CG	0	0	0	0	0	0	0	0	0	NA
chr17	58839993	+	CG	0	0	0	0	0	0	0	0	0	NA
chr17	58839994	-	CG	0	0	0	0	0	0	0	0	0	NA
chr17	58840003	+	CG	0	0	0	0	0	0	0	0	0	NA
chr17	58840004	-	CG	0	0	0	0	0	0	0	0	0	NA
chr17	58840009	+	CG	0	0	0	0	0	0	0	0	0	NA
chr17	58840010	-	CG	0	0	0	0	0	0	0	0	0	NA
chr17	58840016	+	CG	0	0	0	0	0	0	0	0	0	NA
chr17	58840017	-	CG	0	0	0	0	0	0	0	0	0	NA
chr17	58840022	+	CG	0	0	0	0	0	0	0	0	0	NA
chr17	58840023	-	CG	0	0	0	0	0	0	0	0	0	NA
chr17	58840027	+	CG	0	0	0	0	0	0.111	0	0.037	0.037	0.42265
chr17	58840028	-	CG	0	0	0	0	0	0	0	0	0	NA
chr17	58840050	+	CG	0	0	0.167	0	0	0	0.0556667	0	-0.0556667	0.42265
chr17	58840051	-	CG	0	0	0	0	0	0	0	0	0	NA
chr17	58840066	+	CG	0	0	0	0	0	0	0	0	0	NA
chr17	58840067	-	CG	0	0	0	0	0	0	0	0	0	NA
chr17	58840088	+	CG	0	0	0	0	0	0	0	0	0	NA
chr17	58840089	-	CG	0	0	0	0	0	0	0	0	0	NA
chr17	58840121	+	CG	0	0	0	0	0	0	0	0	0	NA
chr17	58840122	-	CG	0	0	0	0	0	0	0	0	0	NA
chr17	58840148	+	CG	0	0	0	0	0	0	0	0	0	NA
chr17	58840181	+	CG	0	0	0.1	0	0	0.111	0.0333333	0.037	0.00366667	0.944879
chr17	58840188	+	CG	0	0	0	0	0	0	0	0	0	NA
chr17	58840204	+	CG	0.077	0	0	0	0	0	0.0256667	0	-0.0256667	0.42265
chr17	58840255	+	CG	0	0	0	0	0	0	0	0	0	NA
chr17	58840256	-	CG	0	0	0	0	0	0	0	0	0	NA
chr17	58840290	+	CG	0	0	0	0	0	0	0	0	0	NA
chr17	58840291	-	CG	0	0	0	0	0	0	0	0	0	NA
chr17	58840334	+	CG	0	0	0	0	0	0	0	0	0	NA
chr17	58840335	-	CG	0	0	0	0	0	0	0	0	0	NA
chr17	58840343	+	CG	0	0	0	0	0	0	0	0	0	NA
chr17	58840344	-	CG	0.333	0	0	0	0	0	0.111	0	-0.111	0.42265
chr17	58840345	+	CG	0	0	0	0	0	0	0	0	0	NA
chr17	58840346	-	CG	0	0	0	0	0	0	0	0	0	NA
chr17	58840364	+	CG	0	0	0	0	0	0	0	0	0	NA
chr17	58840365	-	CG	0	0	0	0	0	0	0	0	0	NA
chr17	58840447	+	CG	0	0	0	0	0	0	0	0	0	NA
chr17	58840448	-	CG	0	0	0	0	0	0	0	0	0	NA
chr17	58840455	+	CG	0	0	0.091	0	0	0	0.0303333	0	-0.0303333	0.42265
chr17	58840456	-	CG	0	0	0	0	0	0	0	0	0	NA
chr17	58840464	+	CG	0	0	0.083	0	0	0	0.0276667	0	-0.0276667	0.42265
chr17	58840465	-	CG	0	0	0	0	0	0	0	0	0	NA
chr17	58840476	+	CG	0	0	0	0	0	0	0	0	0	NA
chr17	58840477	-	CG	0	0	0	0	0	0	0	0	0	NA
chr17	58840482	+	CG	0	0	0	0	0	0	0	0	0	NA
chr17	58840483	-	CG	0	0	0	0	0	0	0	0	0	NA
chr17	58840520	+	CG	0	0	0	0	0	0	0	0	0	NA
chr17	58840521	-	CG	0	0	0	0	0	0	0	0	0	NA
chr17	58840554	+	CG	0	0	0	0	0	0	0	0	0	NA
chr17	58840555	-	CG	0	0	0	0	0	0	0	0	0	NA
chr17	58840564	+	CG	0	0	0	0.25	0	0	0	0.0833333	0.0833333	0.42265
chr17	58840565	-	CG	0	0	0	0	0	0	0	0	0	NA
chr17	58840601	+	CG	0.167	0	0	0.143	0	0	0.0556667	0.0476667	-0.008	0.91845
chr17	58840602	-	CG	0	0	0	0	0	0	0	0	0	NA
chr17	58840625	+	CG	0	0	0	0	0	0.4	0	0.133333	0.133333	0.42265
chr17	58840626	-	CG	0	0	0	0	0	0	0	0	0	NA
chr17	58840640	+	CG	0	0	0	0.2	0	0	0	0.0666667	0.0666667	0.42265
chr17	58840641	-	CG	0	0	0.2	0	0	0	0.0666667	0	-0.0666667	0.42265
chr17	58840708	+	CG	0	0	0	0	0	0	0	0	0	NA
chr17	58840709	-	CG	0	0	0	0	0	0	0	0	0	NA
chr17	58840810	+	CG	0	0	0	0	0	0	0	0	0	NA
chr17	58840811	-	CG	0	0	0	0	0	0	0	0	0	NA
chr17	58840818	+	CG	0	0	0	0	0	0	0	0	0	NA
chr17	58840819	-	CG	0	0	0	0	0	0	0	0	0	NA
chr17	58840821	+	CG	0	0	0	0	0	0	0	0	0	NA
chr17	58840822	-	CG	0	0	0	0	0	0	0	0	0	NA
chr17	58840837	+	CG	0	0	0	0	0	0	0	0	0	NA
chr17	58840838	-	CG	0	0	0	0	0	0	0	0	0	NA
chr17	58840858	+	CG	0	0	0	0	0	0	0	0	0	NA
chr17	58840859	-	CG	0	0	0	0	0	0	0	0	0	NA
chr17	58840872	+	CG	0	0	0	0	0.077	0	0	0.0256667	0.0256667	0.42265
chr17	58840873	-	CG	0	0	0	0	0	0	0	0	0	NA
chr17	58840915	+	CG	0	0	0	0	0	0	0	0	0	NA
chr17	58840916	-	CG	0	0	0	0	0	0	0	0	0	NA
chr17	58840928	+	CG	0	0	0	0	0	0	0	0	0	NA
chr17	58840929	-	CG	0	0	0	0	0	0	0	0	0	NA
chr17	58840943	+	CG	0	0	0	0	0	0	0	0	0	NA
chr17	58840944	-	CG	0	0	0	0	0	0	0	0	0	NA
chr17	58840952	+	CG	0	0	0	0	0	0	0	0	0	NA
chr17	58840953	-	CG	0	0	0	0	0	0	0	0	0	NA
chr17	58840959	+	CG	0	0	0	0	0	0	0	0	0	NA
chr17	58840960	-	CG	0	0	0	0	0	0	0	0	0	NA
chr17	58840964	+	CG	0	0	0	0	0	0	0	0	0	NA
chr17	58840965	-	CG	0	0	0.059	0	0	0.167	0.0196667	0.0556667	0.036	0.593047
chr17	58840975	+	CG	0	0	0	0	0	0	0	0	0	NA
chr17	58840976	-	CG	0	0	0.062	0	0	0	0.0206667	0	-0.0206667	0.42265
chr17	58841038	+	CG	0	0.25	0	0	0	0	0.0833333	0	-0.0833333	0.42265
chr17	58841039	-	CG	0	0	0	0	0	0	0	0	0	NA
chr17	58841067	+	CG	0	0	0	0	0	0	0	0	0	NA
chr17	58841068	-	CG	0	0	0.083	0	0	0	0.0276667	0	-0.0276667	0.42265
chr17	58841076	+	CG	0	0	0	0	0	0	0	0	0	NA
chr17	58841077	-	CG	0	0	0	0	0	0	0	0	0	NA
chr17	58841123	+	CG	0	0	0	0	0	0	0	0	0	NA
chr17	58841155	+	CG	0	0	0	0	0	0	0	0	0	NA
chr17	58841193	+	CG	0	0	0	0	0	0	0	0	0	NA
chr17	58841203	+	CG	0	0	0	0	0	0	0	0	0	NA
chr17	58841207	+	CG	0	0	0	0	0	0	0	0	0	NA
chr17	58841211	+	CG	0	0	0	0	0	0.25	0	0.0833333	0.0833333	0.42265
chr17	58841236	+	CG	0	0	0	0	0	0	0	0	0	NA
chr17	58841237	-	CG	0	0	0	0	0	0	0	0	0	NA
chr17	58841285	+	CG	0	0	0	0	0	0	0	0	0	NA
chr17	58841297	+	CG	0	0	0	0	0	0	0	0	0	NA
chr17	58841303	+	CG	0	0	0	0	0	0	0	0	0	NA
chr17	58841317	+	CG	0	0	0	0	0	0	0	0	0	NA
chr17	58841335	+	CG	0	0	0	0.091	0	0	0	0.0303333	0.0303333	0.42265
chr17	58841391	+	CG	0	0	0	0	0	0	0	0	0	NA
chr17	58841392	-	CG	0	0	0	0	0	0	0	0	0	NA
chr17	58841452	+	CG	0.333	0	0	0	0	0.111	0.111	0.037	-0.074	0.581315
chr17	58841453	-	CG	0	0	0	0	0	0	0	0	0	NA
chr17	58841470	+	CG	0	0	0.1	0	0	0	0.0333333	0	-0.0333333	0.42265
chr17	58841471	-	CG	0	0	0	0	0	0	0	0	0	NA
chr17	58841548	+	CG	0	0	0	0	0	0	0	0	0	NA
chr17	58841549	-	CG	0	0	0	0	0	0	0	0	0	NA
chr17	58841577	+	CG	0	0	0	0	0	0.111	0	0.037	0.037	0.42265
chr17	58841578	-	CG	0	0	0	0	0	0	0	0	0	NA
chr17	58841591	+	CG	0	0	0	0	0	0	0	0	0	NA
chr17	58841592	-	CG	0	0	0	0	0	0	0	0	0	NA
chr17	58841630	+	CG	0	0	0	0	0.1	0	0	0.0333333	0.0333333	0.42265
chr17	58841631	-	CG	0	0	0	0	0.1	0	0	0.0333333	0.0333333	0.42265
chr17	58841654	+	CG	0	0	0	0	0	0	0	0	0	NA
chr17	58841655	-	CG	0	0	0	0	0.1	0	0	0.0333333	0.0333333	0.42265
chr17	58841847	+	CG	0	0	0	0	0	0.5	0	0.166667	0.166667	0.42265
chr17	58841848	-	CG	0	0	0	0	0	0	0	0	0	NA
chr17	58841921	+	CG	0	0	0	0.143	0	0	0	0.0476667	0.0476667	0.42265
chr17	58841922	-	CG	0	0	0	0	0	0	0	0	0	NA
chr17	58841962	+	CG	0.2	0	0.077	0	0	0.1	0.0923333	0.0333333	-0.059	0.440613
chr17	58841963	-	CG	0.308	0	0	0.429	0.111	0	0.102667	0.18	0.0773333	0.663934
chr17	58841999	+	CG	0.071	0.056	0	0	0	0	0.0423333	0	-0.0423333	0.18914
chr17	58842000	-	CG	0	0	0	0.25	0	0.087	0	0.112333	0.112333	0.264968
chr17	58842083	+	CG	0.071	0	0	0	0	0	0.0236667	0	-0.0236667	0.42265
chr17	58842084	-	CG	0.154	0	0	0.125	0.062	0	0.0513333	0.0623333	0.011	0.870278
chr17	58842154	+	CG	0.3	0	0.267	0.231	0.308	0.167	0.189	0.235333	0.0463333	0.687301
chr17	58842155	-	CG	0.214	0.167	0.273	0.25	0.182	0.133	0.218	0.188333	-0.0296667	0.5522
chr17	58842414	+	CG	0.208	0	0.211	0.111	0.143	0.154	0.139667	0.136	-0.00366667	0.96325
chr17	58842415	-	CG	0.091	0.167	0.091	0	0	0.25	0.116333	0.0833333	-0.033	0.736128
chr17	58842452	+	CG	0.067	0	0.389	0.316	0.533	0.25	0.152	0.366333	0.214333	0.226861
chr17	58842459	+	CG	0.714	0.375	0.429	0.444	0.529	0.583	0.506	0.518667	0.0126667	0.918655
chr17	58842460	-	CG	0.5	0.167	0.462	0.5	0.177	0.2	0.376333	0.292333	-0.084	0.600647
chr17	58842699	+	CG	0.556	0.8	0.625	0.526	0.52	0.438	0.660333	0.494667	-0.165667	0.137532
chr17	58842700	-	CG	0.435	0.65	0.5	0.529	0.667	0.6	0.528333	0.598667	0.0703333	0.411337
chr17	58842774	+	CG	0.684	0.786	0.526	0.682	0.692	0.842	0.665333	0.738667	0.0733333	0.473877
chr17	58842775	-	CG	0.789	0.538	0.611	0.533	0.762	0.7	0.646	0.665	0.019	0.86022
chr17	58843240	+	CG	0.667	0.938	0.8	0.833	0.75	0.786	0.801667	0.789667	-0.012	0.894959
chr17	58843241	-	CG	0.8	0.852	0.739	0.72	0.958	0.917	0.797	0.865	0.068	0.46462
chr17	58843329	+	CG	0.786	0.833	0.769	0.9	1	0.857	0.796	0.919	0.123	0.0835704
chr17	58843330	-	CG	0.905	0.8	0.789	0.81	1	0.8	0.831333	0.87	0.0386667	0.63927
chr17	58843335	+	CG	0.667	0.8	0.786	1	0.867	0.75	0.751	0.872333	0.121333	0.236721
chr17	58843336	-	CG	0.831	0.667	0.667	0.7	0.957	0.874	0.721667	0.843667	0.122	0.267888
chr17	58843343	+	CG	0.714	0.667	0.769	1	0.947	0.714	0.716667	0.887	0.170333	0.183815
chr17	58843344	-	CG	0.783	0.933	0.789	0.737	1	0.875	0.835	0.870667	0.0356667	0.716529
chr17	58843345	+	CG	0.857	1	0.923	1	0.95	1	0.926667	0.983333	0.0566667	0.304128
chr17	58843346	-	CG	0.87	0.842	0.947	0.842	0.955	0.938	0.886333	0.911667	0.0253333	0.61989
chr17	58843347	+	CG	0.867	0.833	0.846	0.875	1	1	0.848667	0.958333	0.109667	0.112116
chr17	58843348	-	CG	0.87	1	1	0.895	0.909	0.944	0.956667	0.916	-0.0406667	0.452424
chr17	58843349	+	CG	0.933	1	0.846	1	1	0.833	0.926333	0.944333	0.018	0.81374
chr17	58843350	-	CG	0.955	0.944	0.952	0.895	1	0.842	0.950333	0.912333	-0.038	0.499284
chr17	58843351	+	CG	0.929	1	0.923	1	1	1	0.950667	1	0.0493333	0.184174
chr17	58843352	-	CG	0.952	0.895	0.952	0.95	0.955	1	0.933	0.968333	0.0353333	0.229072
chr17	58843391	+	CG	0.714	0.75	0.538	0.333	0.727	0.5	0.667333	0.52	-0.147333	0.340194
chr17	58843392	-	CG	0.375	0.571	0.35	0.565	0.667	0.4	0.432	0.544	0.112	0.345078
chr17	58843790	+	CG	0.833	1	0.857	0.906	0.938	0.938	0.896667	0.927333	0.0306667	0.618621
chr17	58843791	-	CG	0.857	1	0.714	0.714	0.905	0.857	0.857	0.825333	-0.0316667	0.770329
chr17	58843810	+	CG	0.688	1	0.867	0.889	0.875	0.933	0.851667	0.899	0.0473333	0.655181
chr17	58843811	-	CG	0.909	1	0.714	0.923	1	1	0.874333	0.974333	0.1	0.358493
chr17	58844222	+	CG	0.684	0.913	0.957	0.773	0.875	0.909	0.851333	0.852333	0.001	0.992203
chr17	58844223	-	CG	0.647	0.9	0.933	0.727	1	0.9	0.826667	0.875667	0.049	0.705388
chr17	58844226	+	CG	0.75	0.87	0.696	0.625	0.76	0.75	0.772	0.711667	-0.0603333	0.422031
chr17	58844227	-	CG	0.824	0.9	0.643	0.727	1	1	0.789	0.909	0.12	0.37088
chr17	58844260	+	CG	0.375	0.714	0.421	0.35	0.625	0.722	0.503333	0.565667	0.0623333	0.706221
chr17	58844261	-	CG	0.308	0.727	0.364	0.167	0.571	0.7	0.466333	0.479333	0.013	0.953144
chr17	58844414	+	CG	0.133	0.176	0.235	0	0.286	0.267	0.181333	0.184333	0.003	0.977695
chr17	58844415	-	CG	0.167	0.312	0.105	0.133	0.19	0.333	0.194667	0.218667	0.024	0.792743
chr17	58844541	+	CG	0.4	0.75	0.077	0.273	0.333	0.5	0.409	0.368667	-0.0403333	0.859577
chr17	58844542	-	CG	0.25	0.375	0.091	0.143	0.5	0.55	0.238667	0.397667	0.159	0.364648
chr17	58844570	+	CG	0	0.368	0.071	0	0.111	0.222	0.146333	0.111	-0.0353333	0.80202
chr17	58844571	-	CG	0.053	0.217	0.074	0.045	0.208	0.304	0.114667	0.185667	0.071	0.486415
chr17	58844595	+	CG	0.2	0.895	0.417	0	0.4	0.444	0.504	0.281333	-0.222667	0.428018
chr17	58844596	-	CG	0.4	0.462	0.37	0.25	0.364	0.318	0.410667	0.310667	-0.1	0.0821675
chr17	58844727	+	CG	0	0.3	0.125	0	0.2	0.375	0.141667	0.191667	0.05	0.737953
chr17	58844728	-	CG	0.154	0.6	0.083	0.05	0.5	0.636	0.279	0.395333	0.116333	0.653238
chr17	58844760	+	CG	0	0	0	0	0.5	0.714	0	0.404667	0.404667	0.195901
chr17	58844761	-	CG	0.062	0.615	0.1	0	0.5	0.538	0.259	0.346	0.087	0.744134
chr17	58844785	+	CG	0	0.714	0	0	0.571	0.462	0.238	0.344333	0.106333	0.738623
chr17	58844786	-	CG	0	0.667	0	0	0.625	0.571	0.222333	0.398667	0.176333	0.587415
chr17	58844797	+	CG	0.111	0.714	0	0.143	0.625	0.455	0.275	0.407667	0.132667	0.644836
chr17	58844798	-	CG	0.2	0.933	0.062	0	0.667	0.833	0.398333	0.5	0.101667	0.797823
chr17	58844863	+	CG	0.225	1	0.417	0.308	0.857	0.727	0.547333	0.630667	0.0833333	0.786651
chr17	58844864	-	CG	0.333	1	0.267	0.278	0.786	0.556	0.533333	0.54	0.00666667	0.982116
chr17	58844961	+	CG	0.571	0.833	0.357	0.357	0.929	0.833	0.587	0.706333	0.119333	0.624191
chr17	58844962	-	CG	0.308	0.778	0.5	0.438	1	0.889	0.528667	0.775667	0.247	0.326255
chr17	58845025	+	CG	0.667	0.846	0.6	0.5	0.917	1	0.704333	0.805667	0.101333	0.59755
chr17	58845026	-	CG	0.667	0.857	0.682	0.75	0.786	0.833	0.735333	0.789667	0.0543333	0.47621
chr17	58845080	+	CG	0.765	0.75	0.733	0.727	0.812	0.923	0.749333	0.820667	0.0713333	0.335087
chr17	58845081	-	CG	0.462	0.667	0.75	0.636	0.667	0.571	0.626333	0.624667	-0.00166667	0.986657
chr17	58845119	+	CG	0.533	0.714	0.667	0.643	0.75	0.75	0.638	0.714333	0.0763333	0.314128
chr17	58845120	-	CG	0.556	0.556	0.333	0.727	0.455	0.727	0.481667	0.636333	0.154667	0.260053
chr17	58845151	+	CG	0.667	0.692	0.917	0.882	1	0.9	0.758667	0.927333	0.168667	0.155695
chr17	58845152	-	CG	0.538	0.9	0.923	0.8	0.625	0.9	0.787	0.775	-0.012	0.940033
chr17	58845327	+	CG	0.444	0.5	0.222	0.071	0.5	0.533	0.388667	0.368	-0.0206667	0.911209
chr17	58845328	-	CG	0.364	0.5	0.071	0.267	0.5	0.625	0.311667	0.464	0.152333	0.408248
chr17	58845347	+	CG	0.4	0.4	0.1	0.273	0.5	0.714	0.3	0.495667	0.195667	0.296833
chr17	58845348	-	CG	0.273	0.375	0.143	0.188	0.8	0.667	0.263667	0.551667	0.288	0.257545
chr17	58845353	+	CG	0.545	1	0.636	0.636	0.5	1	0.727	0.712	-0.015	0.944921
chr17	58845354	-	CG	0.909	1	0.538	0.75	1	1	0.815667	0.916667	0.101	0.578646
chr17	58845366	+	CG	0.727	1	0.636	0.615	0.625	0.923	0.787667	0.721	-0.0666667	0.677662
chr17	58845367	-	CG	0.833	0.778	0.583	0.81	0.667	1	0.731333	0.825667	0.0943333	0.487105
chr17	58845444	+	CG	0.789	0.818	0.308	0.667	1	0.909	0.638333	0.858667	0.220333	0.329963
chr17	58845445	-	CG	1	0.556	0.176	0.765	1	0.7	0.577333	0.821667	0.244333	0.419016
chr17	58845478	+	CG	0.778	0.941	0.706	0.6	0.909	0.905	0.808333	0.804667	-0.00366667	0.977958
chr17	58845479	-	CG	0.5	1	0.5	0.579	1	0.888	0.666667	0.822333	0.155667	0.500401
chr17	58845486	+	CG	0.556	0.824	0.526	0.6	0.917	0.913	0.635333	0.81	0.174667	0.285048
chr17	58845487	-	CG	0.8	0.867	0.609	0.545	1	0.923	0.758667	0.822667	0.064	0.715812
chr17	58845489	+	CG	0.667	0.765	0.3	0.476	0.909	0.864	0.577333	0.749667	0.172333	0.43172
chr17	58845490	-	CG	0.667	1	0.333	0.478	0.8	0.857	0.666667	0.711667	0.045	0.853652
chr17	58845512	+	CG	0.571	0.353	0.1	0.3	0.571	0.407	0.341333	0.426	0.0846667	0.625466
chr17	58845513	-	CG	0.286	0.529	0.074	0.269	0.6	0.562	0.296333	0.477	0.180667	0.345499
chr17	58845528	+	CG	0.65	0.938	0.333	0.478	1	0.964	0.640333	0.814	0.173667	0.513708
chr17	58845529	-	CG	0.5	0.941	0.259	0.556	0.824	0.929	0.566667	0.769667	0.203	0.437266
chr17	58845532	+	CG	0.7	0.75	0.391	0.542	0.842	0.929	0.613667	0.771	0.157333	0.387362
chr17	58845533	-	CG	0.286	0.816	0.111	0.538	0.824	0.929	0.404333	0.763667	0.359333	0.231081
chr17	58845540	+	CG	0.762	0.824	0.478	0.37	0.947	1	0.688	0.772333	0.0843333	0.73593
chr17	58845541	-	CG	0.357	0.889	0.273	0.462	1	0.846	0.506333	0.769333	0.263	0.355006
chr17	58845546	+	CG	0.25	0.684	0.167	0.333	0.842	0.821	0.367	0.665333	0.298333	0.266134
chr17	58845547	-	CG	0.375	0.7	0	0.333	0.882	0.643	0.358333	0.619333	0.261	0.3706
chr17	58845582	+	CG	0.667	0.842	0.577	0.556	0.87	1	0.695333	0.808667	0.113333	0.508952
chr17	58845583	-	CG	0.625	0.882	0.591	0.813	1	0.824	0.699333	0.879	0.179667	0.188766
chr17	58845585	+	CG	0.652	0.842	0.423	0.481	0.773	0.815	0.639	0.689667	0.0506667	0.768091
chr17	58845586	-	CG	0.333	0.588	0.348	0.435	0.923	0.75	0.423	0.702667	0.279667	0.182866
chr17	58845728	+	CG	0.583	0.917	0.385	0.615	0.889	0.562	0.628333	0.688667	0.0603333	0.763637
chr17	58845729	-	CG	0.286	0.909	0.35	0.438	0.957	0.818	0.515	0.737667	0.222667	0.428491
chr17	58845827	+	CG	0.375	0.917	0.103	0.182	1	1	0.465	0.727333	0.262333	0.510232
chr17	58845828	-	CG	0.333	0.789	0.118	0.4	0.778	0.778	0.413333	0.652	0.238667	0.375845
chr17	58845863	+	CG	0.556	0.846	0.522	0.857	0.85	0.917	0.641333	0.874667	0.233333	0.146244
chr17	58845864	-	CG	0.812	0.958	0.667	0.786	1	0.952	0.812333	0.912667	0.100333	0.401113
chr17	58845901	+	CG	0.6	0.636	0	0.091	0.812	0.917	0.412	0.606667	0.194667	0.590193
chr17	58845902	-	CG	0.562	0.8	0.111	0.538	0.885	0.8	0.491	0.741	0.25	0.352032
chr17	58845911	+	CG	0.444	0.818	0.286	0.333	0.786	0.818	0.516	0.645667	0.129667	0.590963
chr17	58845912	-	CG	0.6	0.778	0.235	0.538	0.96	0.9	0.537667	0.799333	0.261667	0.277457
chr17	58845949	+	CG	0.667	0.75	0.533	0.6	0.846	0.923	0.65	0.789667	0.139667	0.305441
chr17	58845950	-	CG	0.846	1	0.688	0.417	0.941	0.889	0.844667	0.749	-0.0956667	0.647552
chr17	58845971	+	CG	1	1	0.647	1	0.818	1	0.882333	0.939333	0.057	0.695908
chr17	58845972	-	CG	0.857	0.923	0.8	0.636	0.944	0.875	0.86	0.818333	-0.0416667	0.708856
chr17	58846057	+	CG	0.571	0.857	0.308	0.875	0.583	0.375	0.578667	0.611	0.0323333	0.887715
chr17	58846058	-	CG	0.462	0.9	0.231	0.364	0.6	0.5	0.531	0.488	-0.043	0.85183
chr17	58846087	+	CG	0.667	0.857	0.6	1	0.727	0.667	0.708	0.798	0.09	0.524055
chr17	58846088	-	CG	0.857	0.778	0.615	0.7	0.955	1	0.75	0.885	0.135	0.318662
chr17	58846109	+	CG	0.667	0.833	0.667	0.778	0.8	1	0.722333	0.859333	0.137	0.205442
chr17	58846110	-	CG	0.571	0.625	0.333	0.333	0.6	0.655	0.509667	0.529333	0.0196667	0.890423
chr17	58846248	+	CG	0.857	0.833	0.8	0.857	1	0.917	0.83	0.924667	0.0946667	0.137077
chr17	58846249	-	CG	0.833	0.727	0.75	0.9	1	0.778	0.77	0.892667	0.122667	0.187801
chr17	58846254	+	CG	1	0.917	0.786	1	1	1	0.901	1	0.099	0.252945
chr17	58846255	-	CG	1	1	0.812	0.889	1	1	0.937333	0.963	0.0256667	0.746012
chr17	58846260	+	CG	1	1	0.786	1	1	1	0.928667	1	0.0713333	0.42265
chr17	58846261	-	CG	0.842	1	0.765	0.778	0.923	1	0.869	0.900333	0.0313333	0.758073
chr17	58846442	+	CG	0.882	0.95	0.571	0.929	1	1	0.801	0.976333	0.175333	0.269605
chr17	58846443	-	CG	0.789	0.933	0.5	0.762	1	0.917	0.740667	0.893	0.152333	0.368798
chr17	58846656	+	CG	0.636	1	0.571	0.778	1	0.941	0.735667	0.906333	0.170667	0.337097
chr17	58846657	-	CG	0.909	1	0.462	0.611	1	0.923	0.790333	0.844667	0.0543333	0.804825
chr17	58846692	+	CG	0.7	1	0.5	0.857	0.85	0.875	0.733333	0.860667	0.127333	0.473337
chr17	58846693	-	CG	1	1	0.571	0.778	0.625	1	0.857	0.801	-0.056	0.771959
chr17	58847104	+	CG	0.5	0.611	0.619	0.684	0.762	0.75	0.576667	0.732	0.155333	0.0348929
chr17	58847105	-	CG	0.385	0.625	0.462	0.818	0.583	0.842	0.490667	0.747667	0.257	0.0789777
chr17	58847121	+	CG	0.733	0.688	0.714	0.864	0.714	0.636	0.711667	0.738	0.0263333	0.734136
chr17	58847122	-	CG	0.429	0.692	0.667	0.636	0.714	0.792	0.596	0.714	0.118	0.30134
chr17	58847175	+	CG	0.4	0.353	0.368	0.375	0.571	0.647	0.373667	0.531	0.157333	0.188664
chr17	58847176	-	CG	0.583	0.357	0.25	0.5	0.538	0.333	0.396667	0.457	0.0603333	0.636626
chr17	58847235	+	CG	0.727	0.833	0.821	1	0.6	0.913	0.793667	0.837667	0.044	0.756325
chr17	58847236	-	CG	0.882	0.727	0.615	0.846	0.923	0.833	0.741333	0.867333	0.126	0.240149
chr17	58847270	+	CG	0.714	0.733	0.615	0.667	0.545	0.421	0.687333	0.544333	-0.143	0.171627
chr17	58847271	-	CG	0.75	0.636	0.5	0.625	0.533	0.562	0.628667	0.573333	-0.0553333	0.533424
chr17	58847397	+	CG	0.231	0.545	0.067	0.3	0.133	0.154	0.281	0.195667	-0.0853333	0.615044
chr17	58847398	-	CG	0.208	0.4	0.263	0.143	0.345	0.286	0.290333	0.258	-0.0323333	0.716104
chr17	58847449	+	CG	0.7	0.583	0.75	0.857	0.833	0.769	0.677667	0.819667	0.142	0.0838689
chr17	58847450	-	CG	0.818	0.6	0.632	0.577	0.667	0.647	0.683333	0.630333	-0.053	0.528276
chr17	58847621	-	CG	1	0.833	0.25	0	0.043	1	0.694333	0.347667	-0.346667	0.438129
chr17	58847774	+	CG	0.533	0.773	0.875	0.5	0.722	0.818	0.727	0.68	-0.047	0.751265
chr17	58847775	-	CG	0.65	0.857	0.733	0.667	0.769	0.667	0.746667	0.701	-0.0456667	0.553651
chr17	58847790	+	CG	0.235	0.8	0.667	0.538	0.75	0.583	0.567333	0.623667	0.0563333	0.780741
chr17	58847791	-	CG	0.55	0.65	0.64	0.667	0.536	0.526	0.613333	0.576333	-0.037	0.545113
chr17	58847797	+	CG	0.647	0.895	0.889	0.692	0.867	0.923	0.810333	0.827333	0.017	0.881973
chr17	58847798	-	CG	0.652	0.842	0.708	0.857	0.889	0.778	0.734	0.841333	0.107333	0.192443
chr17	58847845	+	CG	0.333	0.737	0.667	0.5	0.625	0.625	0.579	0.583333	0.00433333	0.976201
chr17	58847846	-	CG	0.583	0.529	0.625	0.5	0.478	0.556	0.579	0.511333	-0.0676667	0.137275
chr17	58847996	+	CG	0.5	0.867	0.615	0.8	0.85	0.562	0.660667	0.737333	0.0766667	0.614474
chr17	58847997	-	CG	0.562	0.867	0.727	0.625	0.68	0.833	0.718667	0.712667	-0.006	0.958603
chr17	58848007	+	CG	0.692	0.5	0.25	1	0.444	0.533	0.480667	0.659	0.178333	0.456574
chr17	58848008	-	CG	0.467	0.467	0.273	0.294	0.48	0.769	0.402333	0.514333	0.112	0.518876
chr17	58848049	+	CG	0.364	0.714	0.125	0.4	0.667	0.588	0.401	0.551667	0.150667	0.48589
chr17	58848050	-	CG	0.438	0.714	0.2	0.375	0.5	0.75	0.450667	0.541667	0.091	0.650531
chr17	58848066	+	CG	0.615	0.688	0.444	0.857	0.474	0.611	0.582333	0.647333	0.065	0.655514
chr17	58848067	-	CG	0.444	0.706	0.1	0.231	0.556	0.75	0.416667	0.512333	0.0956667	0.701364
chr17	58848121	+	CG	0.789	0.706	0.706	0.875	0.875	0.818	0.733667	0.856	0.122333	0.0269258
chr17	58848122	-	CG	0.5	0.786	0.125	0.5	0.923	0.8	0.470333	0.741	0.270667	0.31205
chr17	58848201	+	CG	0.783	1	0.875	0.941	0.87	0.962	0.886	0.924333	0.0383333	0.619298
chr17	58848202	-	CG	0.765	0.846	1	0.7	0.95	0.909	0.870333	0.853	-0.0173333	0.875401
chr17	58848626	+	CG	0.688	1	0.545	0.714	0.933	1	0.744333	0.882333	0.138	0.444009
chr17	58848627	-	CG	0.767	0.947	0.696	0.783	0.8	0.692	0.803333	0.758333	-0.045	0.623722
chr17	58848645	+	CG	0.571	0.929	0.579	0.632	0.643	1	0.693	0.758333	0.0653333	0.71866
chr17	58848646	-	CG	0.593	0.882	0.5	0.682	0.9	1	0.658333	0.860667	0.202333	0.247266
chr17	58848782	+	CG	1	0.947	0.947	0.941	0.938	0.923	0.964667	0.934	-0.0306667	0.218846
chr17	58848783	-	CG	1	1	1	0.96	1	0.941	1	0.967	-0.033	0.198137
chr17	58848899	+	CG	0.833	0.9	0.562	0.905	1	1	0.765	0.968333	0.203333	0.180297
chr17	58848900	-	CG	0.875	0.8	0.647	0.955	1	0.923	0.774	0.959333	0.185333	0.0978684
chr17	58848967	+	CG	0.8	1	0.417	0.889	1	0.824	0.739	0.904333	0.165333	0.439258
chr17	58848968	-	CG	0.786	1	0.889	0.895	0.938	0.909	0.891667	0.914	0.0223333	0.754789
chr17	58849016	+	CG	0.8	1	0.308	1	1	1	0.702667	1	0.297333	0.285047
chr17	58849017	-	CG	0.615	1	0.818	0.923	0.667	0.857	0.811	0.815667	0.00466667	0.974297
chr17	58849018	+	CG	0.933	1	0.818	1	1	0.941	0.917	0.980333	0.0633333	0.358272
chr17	58849019	-	CG	0.917	1	0.909	1	0.867	1	0.942	0.955667	0.0136667	0.811226
chr17	58849029	+	CG	0.688	0.833	0.667	1	0.933	0.944	0.729333	0.959	0.229667	0.0341534
chr17	58849030	-	CG	0.833	0.875	1	0.75	0.867	0.857	0.902667	0.824667	-0.078	0.285747
chr17	58849043	+	CG	0.533	0.9	0.364	0.769	0.929	0.941	0.599	0.879667	0.280667	0.211231
chr17	58849044	-	CG	0.6	0.667	0.727	0.75	0.929	0.75	0.664667	0.809667	0.145	0.121329
chr17	58849050	+	CG	0.6	0.9	0.545	0.667	1	0.75	0.681667	0.805667	0.124	0.452348
chr17	58849051	-	CG	0.7	1	0.909	1	1	0.909	0.869667	0.969667	0.1	0.379878
chr17	58849061	+	CG	0.867	0.8	0.545	0.833	0.929	1	0.737333	0.920667	0.183333	0.194825
chr17	58849062	-	CG	0.625	1	0.846	0.923	1	1	0.823667	0.974333	0.150667	0.29876
chr17	58849069	+	CG	0.882	1	0.8	0.917	1	1	0.894	0.972333	0.0783333	0.313912
chr17	58849070	-	CG	0.625	0.857	0.929	1	0.938	1	0.803667	0.979333	0.175667	0.190849
chr17	58849079	+	CG	0.765	0.833	0.4	0.833	1	1	0.666	0.944333	0.278333	0.163109
chr17	58849080	-	CG	0.429	0.875	0.667	0.909	0.875	1	0.657	0.928	0.271	0.162258
chr17	58849084	+	CG	0.765	0.846	0.25	0.182	0.667	0.688	0.620333	0.512333	-0.108	0.687507
chr17	58849085	-	CG	0.333	0.778	0.857	0.545	0.75	0.643	0.656	0.646	-0.01	0.9583
chr17	58849088	+	CG	0.75	0.917	0.625	0.636	1	1	0.764	0.878667	0.114667	0.486279
chr17	58849089	-	CG	0.667	0.8	0.867	0.727	0.812	0.769	0.778	0.769333	-0.00866667	0.901338
chr17	58849120	+	CG	0.923	1	0.667	0.667	0.857	0.952	0.863333	0.825333	-0.038	0.786559
chr17	58849121	-	CG	1	0.917	0.643	0.917	0.857	0.947	0.853333	0.907	0.0536667	0.672096
chr17	58849147	+	CG	0.733	1	0.667	0.818	0.929	0.909	0.8	0.885333	0.0853333	0.496629
chr17	58849148	-	CG	1	1	0.818	0.727	0.929	0.947	0.939333	0.867667	-0.0716667	0.484952
chr17	58849149	+	CG	0.8	0.923	0.857	0.636	0.846	0.952	0.86	0.811333	-0.0486667	0.66312
chr17	58849150	-	CG	1	1	0.636	0.727	0.857	0.684	0.878667	0.756	-0.122667	0.427873
chr17	58849165	+	CG	0.786	1	0.833	0.9	1	0.905	0.873	0.935	0.062	0.457101
chr17	58849166	-	CG	1	1	0.75	0.833	0.875	0.941	0.916667	0.883	-0.0336667	0.734567
chr17	58849186	+	CG	0.75	0.769	0.75	0.778	1	0.952	0.756333	0.91	0.153667	0.149188
chr17	58849187	-	CG	0.5	0.818	0.8	0.909	0.923	0.882	0.706	0.904667	0.198667	0.192441
chr17	58849203	+	CG	0.667	0.824	0.625	0.75	0.846	0.619	0.705333	0.738333	0.033	0.730914
chr17	58849204	-	CG	0.25	0.7	0.6	0.6	0.75	0.688	0.516667	0.679333	0.162667	0.356502
chr17	58849215	+	CG	0.889	0.75	0.778	0.625	1	0.889	0.805667	0.838	0.0323333	0.806233
chr17	58849216	-	CG	0.8	1	0.9	0.8	0.923	0.786	0.9	0.836333	-0.0636667	0.431777
chr17	58849224	+	CG	0.727	0.778	0.833	0.636	1	0.667	0.779333	0.767667	-0.0116667	0.930718
chr17	58849225	-	CG	0.4	0.778	0.778	0.636	0.923	0.733	0.652	0.764	0.112	0.506576
chr17	58849279	+	CG	0.722	0.647	0.929	0.545	0.909	0.688	0.766	0.714	-0.052	0.721327
chr17	58849280	-	CG	0.444	0.818	0.615	0.769	0.692	0.786	0.625667	0.749	0.123333	0.372837
chr17	58849314	+	CG	0.667	0.789	0.889	0.364	0.875	0.786	0.781667	0.675	-0.106667	0.580665
chr17	58849315	-	CG	0.8	0.692	0.75	0.667	0.909	0.75	0.747333	0.775333	0.028	0.744044
chr17	58849396	+	CG	0.429	0.667	0.615	0.222	0.632	0.765	0.570333	0.539667	-0.0306667	0.875548
chr17	58849397	-	CG	0.667	0.364	0.333	0.667	0.5	0.714	0.454667	0.627	0.172333	0.253205
chr17	58849416	+	CG	0.667	0.417	0.75	0.462	0.789	0.429	0.611333	0.56	-0.0513333	0.753429
chr17	58849417	-	CG	0.556	0.4	0.545	0.444	0.75	0.688	0.500333	0.627333	0.127	0.315401
chr17	58849455	+	CG	0.75	0.643	0.818	0.667	0.846	0.8	0.737	0.771	0.034	0.669791
chr17	58849456	-	CG	0.857	0.583	0.714	0.667	0.667	0.833	0.718	0.722333	0.00433333	0.966593
chr17	58849470	+	CG	0.833	0.714	0.727	0.5	0.909	0.875	0.758	0.761333	0.00333333	0.982433
chr17	58849471	-	CG	0.833	0.769	0.769	0.778	1	0.818	0.790333	0.865333	0.075	0.389055
chr17	58849491	+	CG	0.692	0.5	0.867	0.714	1	1	0.686333	0.904667	0.218333	0.201152
chr17	58849492	-	CG	0.6	0.545	0.333	0.818	0.909	0.818	0.492667	0.848333	0.355667	0.0358403
chr17	58849497	+	CG	0.818	0.667	0.812	0.571	0.769	1	0.765667	0.78	0.0143333	0.922143
chr17	58849498	-	CG	0.667	0.636	0.625	0.9	1	0.9	0.642667	0.933333	0.290667	0.00675977
chr17	58849516	+	CG	0.9	1	1	0.8	1	1	0.966667	0.933333	-0.0333333	0.685598
chr17	58849517	-	CG	0.857	1	0.667	1	1	1	0.841333	1	0.158667	0.241682
chr17	58849518	+	CG	0.909	1	0.889	0.7	0.944	1	0.932667	0.881333	-0.0513333	0.643347
chr17	58849519	-	CG	0.75	1	0.7	0.889	1	1	0.816667	0.963	0.146333	0.251655
chr17	58849534	+	CG	0.889	0.727	0.833	0.778	1	0.9	0.816333	0.892667	0.0763333	0.397536
chr17	58849535	-	CG	0.857	1	0.7	0.984	0.889	1	0.852333	0.957667	0.105333	0.3515
chr17	58849537	+	CG	0.778	0.909	1	0.75	1	1	0.895667	0.916667	0.021	0.852289
chr17	58849538	-	CG	0.714	1	0.8	0.875	0.667	0.857	0.838	0.799667	-0.0383333	0.740884
chr17	58849560	+	CG	0.667	0.571	0.909	0.667	0.643	0.7	0.715667	0.67	-0.0456667	0.695944
chr17	58849561	-	CG	0.714	0.625	0.6	0.833	0.875	1	0.646333	0.902667	0.256333	0.0174433
chr17	58849574	+	CG	0.857	0.6	1	0.8	0.929	0.6	0.819	0.776333	-0.0426667	0.792291
chr17	58849575	-	CG	0.714	1	0.889	0.8	0.75	1	0.867667	0.85	-0.0176667	0.883365
chr17	58849597	+	CG	0.692	1	0.875	1	0.9	0.9	0.855667	0.933333	0.0776667	0.484935
chr17	58849598	-	CG	0.833	0.857	0.625	1	1	1	0.771667	1	0.228333	0.0902092
chr17	58849679	+	CG	0.714	1	0.75	1	0.8	0.917	0.821333	0.905667	0.0843333	0.481714
chr17	58849680	-	CG	1	0.75	0.571	1	1	0.75	0.773667	0.916667	0.143	0.40087
chr17	58849740	+	CG	0.923	0.833	0.857	0.933	1	1	0.871	0.977667	0.106667	0.0397151
chr17	58849741	-	CG	1	1	0.846	1	1	1	0.948667	1	0.0513333	0.42265
chr17	58849825	+	CG	1	0.909	0.833	0.8	0.9	0.857	0.914	0.852333	-0.0616667	0.347287
chr17	58849826	-	CG	0.909	1	0.75	0.857	0.6	1	0.886333	0.819	-0.0673333	0.655646
chr17	58849884	+	CG	0.6	0.6	0.167	0.5	0.5	0.25	0.455667	0.416667	-0.039	0.829161
chr17	58849885	-	CG	0.444	0.444	0.364	0.3	0.143	0.667	0.417333	0.37	-0.0473333	0.790774
chr17	58849920	+	CG	1	0.75	1	1	1	1	0.916667	1	0.0833333	0.42265
chr17	58849921	-	CG	0.714	0.75	1	0.714	1	1	0.821333	0.904667	0.0833333	0.559552
chr17	58849942	-	CG	0.714	0.714	0.6	0.4	0.667	0.6	0.676	0.555667	-0.120333	0.272405
chr17	58849961	-	CG	0.833	1	1	0.8	0.5	1	0.944333	0.766667	-0.177667	0.348516
chr17	58849976	-	CG	0.75	0.667	0	0.75	1	0.625	0.472333	0.791667	0.319333	0.314438
chr17	58850020	-	CG	0.4	0.667	0.5	0.5	0	0.444	0.522333	0.314667	-0.207667	0.325951
chr17	58850039	+	CG	0.625	1	0.571	0	0.75	1	0.732	0.583333	-0.148667	0.684633
chr17	58850040	-	CG	0.4	0.571	0.6	0.6	0	0.5	0.523667	0.366667	-0.157	0.493132
chr17	58850127	+	CG	0.818	0.333	0.4	0.857	0.583	0.7	0.517	0.713333	0.196333	0.334287
chr17	58850128	-	CG	0.5	0.5	0.5	0.462	0.273	0.421	0.5	0.385333	-0.114667	0.183821
chr17	58850137	+	CG	0.545	0.833	0.273	0.625	0.357	0.75	0.550333	0.577333	0.027	0.89924
chr17	58850138	-	CG	0.429	0.8	0.5	0.429	0.364	0.571	0.576333	0.454667	-0.121667	0.414069
chr17	58850146	+	CG	0.6	0.833	0.333	0.667	0.462	0.667	0.588667	0.598667	0.01	0.954226
chr17	58850147	-	CG	0.385	0.778	0.429	0.571	0.231	0.609	0.530667	0.470333	-0.0603333	0.744744
chr17	58850165	+	CG	0.778	0.833	0.286	0.556	0.333	0.615	0.632333	0.501333	-0.131	0.548989
chr17	58850166	-	CG	0.438	0.7	0.286	0.333	0.333	0.714	0.474667	0.46	-0.0146667	0.937369
chr17	58850174	+	CG	0.625	0.6	0.429	0.667	0.25	0.667	0.551333	0.528	-0.0233333	0.888562
chr17	58850175	-	CG	0.312	0.9	0.714	0.5	0.417	0.636	0.642	0.517667	-0.124333	0.557484
chr17	58850190	+	CG	0.833	0.667	0.125	0.375	0.286	0.846	0.541667	0.502333	-0.0393333	0.893638
chr17	58850191	-	CG	0.211	0.7	0.857	0.357	0.385	0.565	0.589333	0.435667	-0.153667	0.519303
chr17	58850267	+	CG	0.667	0.857	0.778	0.714	0.625	0.722	0.767333	0.687	-0.0803333	0.289738
chr17	58850268	-	CG	0.682	0.9	0.857	0.556	0.917	0.84	0.813	0.771	-0.042	0.76332
chr17	58850270	+	CG	1	1	0.889	1	0.812	0.938	0.963	0.916667	-0.0463333	0.529796
chr17	58850271	-	CG	0.714	0.833	0.786	0.75	0.923	0.92	0.777667	0.864333	0.0866667	0.278108
chr17	58850285	+	CG	0.667	1	0.778	0.875	0.812	0.812	0.815	0.833	0.018	0.87264
chr17	58850286	-	CG	0.75	1	0.857	0.375	0.923	0.917	0.869	0.738333	-0.130667	0.558158
chr17	58850293	+	CG	0.667	0.857	0.818	0.75	0.75	0.786	0.780667	0.762	-0.0186667	0.780161
chr17	58850294	-	CG	0.708	0.846	0.714	0.5	0.917	0.917	0.756	0.778	0.022	0.891979
chr17	58850319	+	CG	0.8	1	1	1	0.8	1	0.933333	0.933333	0	1
chr17	58850320	-	CG	0.875	1	0.875	0.778	0.8	0.952	0.916667	0.843333	-0.0733333	0.35023
chr17	58850371	+	CG	1	0.833	1	0.929	1	1	0.944333	0.976333	0.032	0.637157
chr17	58850372	-	CG	0.968	0.923	0.933	1	0.889	1	0.941333	0.963	0.0216667	0.62736
chr17	58850380	+	CG	0.75	1	0.9	0.923	1	0.846	0.883333	0.923	0.0396667	0.670334
chr17	58850381	-	CG	0.931	1	1	0.9	0.889	0.95	0.977	0.913	-0.064	0.100098
chr17	58850394	+	CG	0.909	1	0.917	1	0.889	1	0.942	0.963	0.021	0.679777
chr17	58850395	-	CG	0.962	1	1	1	0.909	1	0.987333	0.969667	-0.0176667	0.632386
chr17	58850402	+	CG	1	0.833	0.923	1	1	0.933	0.918667	0.977667	0.059	0.352786
chr17	58850403	-	CG	1	1	1	1	1	1	1	1	0	NA
chr17	58850425	+	CG	0.846	1	0.929	1	1	0.929	0.925	0.976333	0.0513333	0.382379
chr17	58850426	-	CG	0.962	0.688	0.933	0.875	0.778	1	0.861	0.884333	0.0233333	0.840493
chr17	58850435	+	CG	1	1	0.867	0.933	1	1	0.955667	0.977667	0.022	0.68808
chr17	58850436	-	CG	0.962	1	0.923	0.9	1	1	0.961667	0.966667	0.005	0.907544
chr17	58850576	+	CG	1	1	1	0.875	1	1	1	0.958333	-0.0416667	0.42265
chr17	58850577	-	CG	1	0.917	1	0.929	0.857	0.933	0.972333	0.906333	-0.066	0.150647
chr17	58850586	+	CG	0.909	0.875	0.938	1	1	1	0.907333	1	0.0926667	0.0364979
chr17	58850587	-	CG	0.667	1	1	0.929	0.875	0.933	0.889	0.912333	0.0233333	0.854056
chr17	58850617	+	CG	0.909	1	0.733	1	1	1	0.880667	1	0.119333	0.267264
chr17	58850618	-	CG	1	0.857	0.923	0.882	0.875	0.923	0.926667	0.893333	-0.0333333	0.512853
chr17	58850625	+	CG	1	0.857	0.867	1	1	1	0.908	1	0.092	0.184039
chr17	58850626	-	CG	1	1	1	0.941	1	1	1	0.980333	-0.0196667	0.42265
chr17	58850642	+	CG	0.875	1	0.75	0.778	1	1	0.875	0.926	0.051	0.647609
chr17	58850643	-	CG	1	1	0.917	0.889	1	0.833	0.972333	0.907333	-0.065	0.328437
chr17	58850648	+	CG	1	1	1	1	1	1	1	1	0	NA
chr17	58850649	-	CG	1	0.938	1	0.947	1	1	0.979333	0.982333	0.003	0.917576
chr17	58850676	+	CG	1	1	0.667	0.875	1	1	0.889	0.958333	0.0693333	0.606303
chr17	58850677	-	CG	0.818	0.722	0.917	0.947	1	0.917	0.819	0.954667	0.135667	0.122982
chr17	58850723	+	CG	1	1	1	1	1	1	1	1	0	NA
chr17	58850724	-	CG	1	1	0.917	0.95	1	1	0.972333	0.983333	0.011	0.754075
chr17	58850727	+	CG	1	1	1	1	0.833	0.9	1	0.911	-0.089	0.208057
chr17	58850728	-	CG	1	1	1	0.95	1	0.833	1	0.927667	-0.0723333	0.281311
chr17	58850820	+	CG	0.75	1	0.8	0.625	1	0.667	0.85	0.764	-0.086	0.580337
chr17	58850821	-	CG	0.824	0.857	0.9	0.588	0.909	1	0.860333	0.832333	-0.028	0.844757
chr17	58850859	+	CG	0.857	1	0.8	1	1	1	0.885667	1	0.114333	0.194549
chr17	58850860	-	CG	1	0.75	1	1	0.909	0.75	0.916667	0.886333	-0.0303333	0.798076
chr17	58850898	+	CG	0.8	0.833	1	1	1	0.8	0.877667	0.933333	0.0556667	0.573855
chr17	58850899	-	CG	0.75	0.889	0.7	0.867	0.857	0.75	0.779667	0.824667	0.045	0.548411
chr17	58850909	+	CG	0.6	0.833	1	1	1	1	0.811	1	0.189	0.244783
chr17	58850910	-	CG	0.909	0.889	1	0.923	1	1	0.932667	0.974333	0.0416667	0.388639
chr17	58851052	+	CG	0.5	1	1	0.909	0.833	1	0.833333	0.914	0.0806667	0.681848
chr17	58851072	+	CG	0	1	1	0.786	0.778	0.5	0.666667	0.688	0.0213333	0.955796
chr17	58851073	-	CG	1	0.5	0.933	0.9	0.8	0.667	0.811	0.789	-0.022	0.906342
chr17	58851075	+	CG	0	0.667	0.833	0.714	1	1	0.5	0.904667	0.404667	0.248507
chr17	58851076	-	CG	0	1	1	0.778	0.786	1	0.666667	0.854667	0.188	0.632677
chr17	58851079	+	CG	0	1	1	0.929	0.889	0.667	0.666667	0.828333	0.161667	0.679528
chr17	58851080	-	CG	1	1	0.812	1	0.769	1	0.937333	0.923	-0.0143333	0.892459
chr17	58851137	+	CG	0	0.4	0.625	0.75	0.583	0.714	0.341667	0.682333	0.340667	0.197277
chr17	58851138	-	CG	1	0.667	0.882	0.75	0.909	1	0.849667	0.886333	0.0366667	0.779528
chr17	58851151	+	CG	0.333	1	1	0.818	0.917	1	0.777667	0.911667	0.134	0.611617
chr17	58851152	-	CG	1	0.333	1	0.6	0.9	0.5	0.777667	0.666667	-0.111	0.689544
chr17	58851162	+	CG	1	0.333	0.875	0.846	0.833	0.571	0.736	0.75	0.014	0.954329
chr17	58851163	-	CG	0	1	0.933	0.667	0.889	0.667	0.644333	0.741	0.0966667	0.795494
chr17	58851191	+	CG	0.5	0.667	1	0.714	0.727	1	0.722333	0.813667	0.0913333	0.6322
chr17	58851192	-	CG	1	0	0.75	0.833	0.714	1	0.583333	0.849	0.265667	0.473429
chr17	58851258	+	CG	0.833	1	0.944	0.636	1	1	0.925667	0.878667	-0.047	0.746307
chr17	58851259	-	CG	0.7	1	1	1	1	1	0.9	1	0.1	0.42265
chr17	58851273	+	CG	0.917	1	0.895	0.909	1	1	0.937333	0.969667	0.0323333	0.503938
chr17	58851274	-	CG	0.909	0.857	0.917	1	0.75	0.556	0.894333	0.768667	-0.125667	0.431729
chr17	58851451	+	CG	0.5	0.625	0.727	0.444	0.533	0.692	0.617333	0.556333	-0.061	0.567036
chr17	58851452	-	CG	0.533	0.375	0.714	0.636	0.545	0.667	0.540667	0.616	0.0753333	0.531598
chr17	58851506	+	CG	0.5	0.357	0.95	0.8	0.923	0.833	0.602333	0.852	0.249667	0.295586
chr17	58851507	-	CG	0.765	0.652	0.8	0.867	0.6	0.7	0.739	0.722333	-0.0166667	0.863916
chr17	58851574	+	CG	0.429	0.538	0.125	0.438	0.769	0.722	0.364	0.643	0.279	0.160612
chr17	58851575	-	CG	0.578	0.522	0.583	0.722	0.5	0.619	0.561	0.613667	0.0526667	0.503134
chr17	58851618	+	CG	0.381	0.385	0.688	0.882	0.909	0.5	0.484667	0.763667	0.279	0.174095
chr17	58851619	-	CG	0.681	1	0.923	0.812	0.8	1	0.868	0.870667	0.00266667	0.982891
chr17	58851799	+	CG	0.471	0.917	0.636	0.9	1	0.9	0.674667	0.933333	0.258667	0.179242
chr17	58851800	-	CG	0.75	0.9	0.545	0.6	0.9	1	0.731667	0.833333	0.101667	0.556245
chr17	58851805	+	CG	0.562	0.909	0.636	0.545	0.846	0.824	0.702333	0.738333	0.036	0.814036
chr17	58851806	-	CG	0.5	1	0.667	0.6	0.8	1	0.722333	0.8	0.0776667	0.700193
chr17	58851843	+	CG	0.533	1	0.455	0.444	0.833	0.875	0.662667	0.717333	0.0546667	0.815361
chr17	58851844	-	CG	0.364	1	0.636	0.667	1	1	0.666667	0.889	0.222333	0.371339
chr17	58851911	+	CG	0.667	0.75	0.694	0.529	0.75	1	0.703667	0.759667	0.056	0.722497
chr17	58851912	-	CG	0.286	0.714	0.5	0.7	1	0.7	0.5	0.8	0.3	0.135244
chr17	58851938	+	CG	0	0	0.4	0	0.364	0.286	0.133333	0.216667	0.0833333	0.656479
chr17	58851939	-	CG	1	1	0.333	0.364	0.286	0.545	0.777667	0.398333	-0.379333	0.224153
chr17	58852076	+	CG	0.455	1	0.5	0.429	0.667	0.833	0.651667	0.643	-0.00866667	0.969378
chr17	58852077	-	CG	0.7	0.667	0.706	0.6	0.75	1	0.691	0.783333	0.0923333	0.512128
chr17	58852087	+	CG	0.385	0.833	0.5	0.615	0.643	0.923	0.572667	0.727	0.154333	0.41081
chr17	58852088	-	CG	0.545	0.714	0.824	0.8	0.818	1	0.694333	0.872667	0.178333	0.163186
chr17	58852146	+	CG	0.615	0.667	0.625	0.667	0.647	0.692	0.635667	0.668667	0.033	0.186765
chr17	58852147	-	CG	0.545	0.3	0.4	0.538	0.727	0.667	0.415	0.644	0.229	0.0679028
chr17	58852203	+	CG	0.9	0.833	1	0.941	0.929	0.929	0.911	0.933	0.022	0.695112
chr17	58852204	-	CG	0.917	1	0.867	1	0.941	1	0.928	0.980333	0.0523333	0.316039
chr17	58852258	+	CG	0.667	0.75	0.857	0.944	0.722	0.833	0.758	0.833	0.075	0.42573
chr17	58852259	-	CG	0.769	0.833	0.625	0.773	0.765	0.692	0.742333	0.743333	0.001	0.989081
chr17	58852348	+	CG	1	0.929	1	1	0.917	0.833	0.976333	0.916667	-0.0596667	0.349822
chr17	58852349	-	CG	1	0.9	1	0.857	0.882	1	0.966667	0.913	-0.0536667	0.390368
chr17	58852418	+	CG	0.85	0.765	0.688	0.8	0.625	0.789	0.767667	0.738	-0.0296667	0.707541
chr17	58852419	-	CG	0.6	0.8	0.778	0.7	0.857	0.917	0.726	0.824667	0.0986667	0.337028
chr17	58852502	+	CG	0.821	0.9	0.895	0.643	0.722	0.652	0.872	0.672333	-0.199667	0.00503194
chr17	58852503	-	CG	0.375	0.615	0.667	0.739	0.818	0.462	0.552333	0.673	0.120667	0.440292
chr17	58852553	+	CG	0.577	0.8	0.625	0.818	0.733	0.882	0.667333	0.811	0.143667	0.160946
chr17	58852554	-	CG	0.5	0.818	0.72	0.824	0.727	0.588	0.679333	0.713	0.0336667	0.787916
chr17	58852708	+	CG	0.8	1	0.842	0.8	1	1	0.880667	0.933333	0.0526667	0.591219
chr17	58852709	-	CG	0.889	0.889	0.824	1	1	1	0.867333	1	0.132667	0.0256505
chr17	58852728	+	CG	0.706	0.857	1	0.875	0.944	1	0.854333	0.939667	0.0853333	0.429959
chr17	58852729	-	CG	0.875	0.636	0.933	0.929	0.909	0.929	0.814667	0.922333	0.107667	0.357783
chr17	58852733	+	CG	0.625	1	1	0.857	1	0.857	0.875	0.904667	0.0296667	0.840927
chr17	58852734	-	CG	1	0.8	0.812	0.786	1	0.929	0.870667	0.905	0.0343333	0.723129
chr17	58852793	+	CG	0.562	0.875	0.889	0.714	0.9	1	0.775333	0.871333	0.096	0.520407
chr17	58852794	-	CG	0.667	0.727	0.818	0.846	1	0.8	0.737333	0.882	0.144667	0.131757
chr17	58852887	+	CG	0.571	0.636	0.643	0.4	0.688	0.833	0.616667	0.640333	0.0236667	0.870723
chr17	58852888	-	CG	0.583	0.857	0.5	0.571	0.667	0.733	0.646667	0.657	0.0103333	0.936053
chr17	58852958	+	CG	0.5	0.714	0.769	0.467	0.667	1	0.661	0.711333	0.0503333	0.793054
chr17	58852959	-	CG	0.6	1	0.727	0.571	0.714	0.643	0.775667	0.642667	-0.133	0.379808
chr17	58852972	+	CG	0.933	0.917	0.929	0.857	1	1	0.926333	0.952333	0.026	0.640772
chr17	58852973	-	CG	0.867	1	0.909	0.714	1	1	0.925333	0.904667	-0.0206667	0.855455
chr17	58852997	+	CG	0.684	1	0.875	0.385	0.944	0.8	0.853	0.709667	-0.143333	0.506051
chr17	58852998	-	CG	0.7	0.75	0.75	0.7	0.786	0.923	0.733333	0.803	0.0696667	0.39685
chr17	58853117	+	CG	0.778	0.9	1	0.867	0.929	0.9	0.892667	0.898667	0.006	0.935475
chr17	58853118	-	CG	0.875	0.917	1	0.857	0.917	0.857	0.930667	0.877	-0.0536667	0.287148
chr17	58853184	+	CG	1	0.938	1	0.917	1	0.905	0.979333	0.940667	-0.0386667	0.353915
chr17	58853185	-	CG	0.75	1	1	0.857	1	0.9	0.916667	0.919	0.00233333	0.981669
chr17	58853208	+	CG	1	0.824	1	0.9	0.786	0.826	0.941333	0.837333	-0.104	0.216181
chr17	58853209	-	CG	1	0.692	0.571	0.5	0.8	0.857	0.754333	0.719	-0.0353333	0.844823
chr17	58853211	+	CG	0.917	0.824	1	1	1	0.957	0.913667	0.985667	0.072	0.290186
chr17	58853212	-	CG	0.923	1	0.857	0.769	1	0.857	0.926667	0.875333	-0.0513333	0.557924
chr17	58853236	+	CG	1	0.938	0.929	0.875	0.786	0.885	0.955667	0.848667	-0.107	0.0563386
chr17	58853237	-	CG	0.867	0.867	1	0.667	0.9	0.9	0.911333	0.822333	-0.089	0.389247
chr17	58853275	+	CG	0.75	0.643	0.917	0.778	0.909	0.923	0.77	0.87	0.1	0.352546
chr17	58853276	-	CG	0.929	0.688	1	0.818	0.8	1	0.872333	0.872667	0.000333333	0.997825
chr17	58853283	+	CG	0.9	0.857	0.917	1	1	0.917	0.891333	0.972333	0.081	0.0804425
chr17	58853284	-	CG	0.929	0.933	0.875	0.923	1	0.889	0.912333	0.937333	0.025	0.553112
chr17	58853286	+	CG	1	1	0.917	1	1	0.96	0.972333	0.986667	0.0143333	0.673722
chr17	58853287	-	CG	1	0.933	1	1	1	1	0.977667	1	0.0223333	0.42265
chr17	58853296	+	CG	1	1	1	0.909	1	0.958	1	0.955667	-0.0443333	0.233846
chr17	58853297	-	CG	0.8	0.929	1	0.846	0.909	0.889	0.909667	0.881333	-0.0283333	0.683087
chr17	58853321	+	CG	0.909	1	1	1	0.909	1	0.969667	0.969667	0	1
chr17	58853322	-	CG	0.938	0.769	1	1	1	0.923	0.902333	0.974333	0.072	0.411867
chr17	58853363	+	CG	0.917	1	1	1	0.909	1	0.972333	0.969667	-0.00266667	0.951353
chr17	58853364	-	CG	0.769	0.909	1	0.75	0.9	0.818	0.892667	0.822667	-0.07	0.438499
chr17	58853369	+	CG	0.923	0.917	0.818	0.909	1	0.933	0.886	0.947333	0.0613333	0.235445
chr17	58853370	-	CG	0.846	0.909	1	1	1	1	0.918333	1	0.0816667	0.209229
chr17	58853376	+	CG	1	0.923	1	1	1	0.846	0.974333	0.948667	-0.0256667	0.685598
chr17	58853377	-	CG	1	0.909	1	0.917	1	1	0.969667	0.972333	0.00266667	0.951353
chr17	58853385	+	CG	0.917	1	1	1	0.857	1	0.972333	0.952333	-0.02	0.739282
chr17	58853386	-	CG	0.923	0.909	1	1	1	1	0.944	1	0.056	0.186324
chr17	58853409	+	CG	0.929	1	1	0.923	1	0.929	0.976333	0.950667	-0.0256667	0.495103
chr17	58853410	-	CG	1	1	1	1	1	1	1	1	0	NA
chr17	58853427	+	CG	1	1	1	1	1	1	1	1	0	NA
chr17	58853428	-	CG	1	1	1	1	1	0.941	1	0.980333	-0.0196667	0.42265
chr17	58853429	+	CG	1	1	1	1	1	1	1	1	0	NA
chr17	58853430	-	CG	1	0.9	1	1	1	1	0.966667	1	0.0333333	0.42265
chr17	58853432	+	CG	1	1	1	1	0.846	1	1	0.948667	-0.0513333	0.42265
chr17	58853433	-	CG	1	0.9	1	1	1	1	0.966667	1	0.0333333	0.42265
chr17	58853438	+	CG	1	0.938	1	1	1	1	0.979333	1	0.0206667	0.42265
chr17	58853439	-	CG	1	0.9	1	1	0.889	1	0.966667	0.963	-0.00366667	0.944879
chr17	58853447	+	CG	1	0.933	1	0.889	1	0.842	0.977667	0.910333	-0.0673333	0.289052
chr17	58853448	-	CG	1	0.9	1	1	1	0.941	0.966667	0.980333	0.0136667	0.745726
chr17	58853483	+	CG	1	0.889	0.909	1	0.778	0.947	0.932667	0.908333	-0.0243333	0.767516
chr17	58853484	-	CG	1	0.833	1	1	1	0.929	0.944333	0.976333	0.032	0.637157
chr17	58853490	+	CG	1	0.875	1	1	1	0.947	0.958333	0.982333	0.024	0.63643
chr17	58853491	-	CG	0.889	0.833	1	0.8	1	0.846	0.907333	0.882	-0.0253333	0.761926
chr17	58853498	+	CG	0.667	0.75	0.8	0.889	0.889	0.895	0.739	0.891	0.152	0.0590071
chr17	58853499	-	CG	0.778	0.714	0.6	0.571	0.714	0.769	0.697333	0.684667	-0.0126667	0.880034
chr17	58853523	+	CG	1	0.846	1	0.857	0.778	0.765	0.948667	0.8	-0.148667	0.081874
chr17	58853524	-	CG	1	0.8	0.857	0.833	1	0.75	0.885667	0.861	-0.0246667	0.807629
chr17	58853534	+	CG	0.875	0.833	0.917	0.75	0.818	0.688	0.875	0.752	-0.123	0.0609678
chr17	58853535	-	CG	0.857	0.75	0.429	0.857	0.833	0.8	0.678667	0.83	0.151333	0.36018
chr17	58853557	+	CG	0.833	0.727	1	0.8	0.667	0.692	0.853333	0.719667	-0.133667	0.231861
chr17	58853558	-	CG	1	0.2	0.667	0.714	0.714	1	0.622333	0.809333	0.187	0.51639
chr17	58853612	+	CG	1	0.4	0.778	0.833	0.615	0.75	0.726	0.732667	0.00666667	0.974098
chr17	58853613	-	CG	0.727	0.333	0.5	0.667	0.818	0.833	0.52	0.772667	0.252667	0.144044
chr17	58853620	+	CG	1	0.636	0.7	0.842	0.769	0.667	0.778667	0.759333	-0.0193333	0.885925
chr17	58853621	-	CG	0.917	0.25	0.667	0.7	0.75	0.429	0.611333	0.626333	0.015	0.949637
chr17	58853624	+	CG	0.857	0.5	1	0.684	0.455	0.615	0.785667	0.584667	-0.201	0.312022
chr17	58853625	-	CG	0.75	0.125	0.7	0.636	0.846	0.429	0.525	0.637	0.112	0.662192
chr17	58853631	+	CG	1	0.5	0.667	0.632	0.636	0.833	0.722333	0.700333	-0.022	0.90074
chr17	58853632	-	CG	0.714	0.222	0.636	0.727	0.769	0.429	0.524	0.641667	0.117667	0.565965
chr17	58853636	+	CG	0.714	0.3	0.8	0.474	0.455	0.583	0.604667	0.504	-0.100667	0.58554
chr17	58853637	-	CG	0.643	0.3	0.667	0.7	0.615	0.125	0.536667	0.48	-0.0566667	0.806879
chr17	58853702	+	CG	0.875	0.429	0.727	0.714	0.875	0.8	0.677	0.796333	0.119333	0.465572
chr17	58853703	-	CG	0.692	0.5	0.909	0.5	0.818	0.455	0.700333	0.591	-0.109333	0.542309
chr17	58853738	+	CG	1	0.833	0.889	0.933	1	0.778	0.907333	0.903667	-0.00366667	0.966657
chr17	58853739	-	CG	0.929	0.833	0.857	0.9	0.818	0.917	0.873	0.878333	0.00533333	0.905156
chr17	58853753	+	CG	1	0.571	1	0.867	1	0.75	0.857	0.872333	0.0153333	0.929864
chr17	58853754	-	CG	0.833	0.5	0.667	0.7	1	0.769	0.666667	0.823	0.156333	0.302596
chr17	58853755	+	CG	0.5	0.286	0.9	0.8	1	0.625	0.562	0.808333	0.246333	0.318912
chr17	58853756	-	CG	0.417	0.4	0.667	0.556	1	0.692	0.494667	0.749333	0.254667	0.191512
chr17	58853819	+	CG	0.923	0.7	0.909	1	0.9	0.833	0.844	0.911	0.067	0.489473
chr17	58853820	-	CG	1	0.6	0.556	0.667	0.846	1	0.718667	0.837667	0.119	0.529362
chr17	58853822	+	CG	0.923	0.7	0.667	1	1	0.857	0.763333	0.952333	0.189	0.129284
chr17	58853823	-	CG	1	0.5	0.667	0.444	1	1	0.722333	0.814667	0.0923333	0.717142
chr17	58853836	+	CG	0.786	0.222	0.714	0.583	0.625	0.714	0.574	0.640667	0.0666667	0.745733
chr17	58853837	-	CG	0.818	0.6	0.6	0.444	0.846	0.643	0.672667	0.644333	-0.0283333	0.847985
chr17	58853853	+	CG	0.769	0.7	0.846	0.909	0.857	1	0.771667	0.922	0.150333	0.0645137
chr17	58853854	-	CG	0.909	0.833	0.6	0.333	0.917	1	0.780667	0.75	-0.0306667	0.902869
chr17	58853870	+	CG	0.75	0.8	0.786	1	1	0.833	0.778667	0.944333	0.165667	0.0880375
chr17	58853871	-	CG	1	1	0.778	0.833	0.929	0.923	0.926	0.895	-0.031	0.727844
chr17	58853882	+	CG	0.8	0.556	0.769	1	0.909	0.875	0.708333	0.928	0.219667	0.0850446
chr17	58853883	-	CG	1	0.833	0.778	0.818	0.929	1	0.870333	0.915667	0.0453333	0.624251
chr17	58853930	+	CG	0.812	0.714	0.786	1	0.909	1	0.770667	0.969667	0.199	0.00921299
chr17	58853931	-	CG	0.933	0.75	0.875	1	0.833	0.909	0.852667	0.914	0.0613333	0.44534
chr17	58853932	+	CG	0.875	0.857	0.714	1	1	1	0.815333	1	0.184667	0.0683614
chr17	58853933	-	CG	0.846	1	0.667	0.857	0.917	1	0.837667	0.924667	0.087	0.472935
chr17	58853938	+	CG	0.929	0.857	0.857	1	1	1	0.881	1	0.119	0.0383505
chr17	58853939	-	CG	1	1	1	1	1	1	1	1	0	NA
chr17	58853945	+	CG	0.923	0.833	0.929	1	1	1	0.895	1	0.105	0.0774198
chr17	58853946	-	CG	0.923	1	0.9	1	0.917	0.9	0.941	0.939	-0.002	0.965317
chr17	58853960	+	CG	0.769	0.6	0.833	0.667	0.889	0.75	0.734	0.768667	0.0346667	0.733731
chr17	58853961	-	CG	0.917	0.667	1	0.692	1	0.875	0.861333	0.855667	-0.00566667	0.968371
chr17	58853971	+	CG	0.75	0.5	0.769	0.333	0.889	0.625	0.673	0.615667	-0.0573333	0.773484
chr17	58853972	-	CG	0.667	0.8	0.667	0.8	0.733	0.875	0.711333	0.802667	0.0913333	0.205428
chr17	58853975	+	CG	0.583	0.5	0.857	0.667	1	0.75	0.646667	0.805667	0.159	0.340983
chr17	58853976	-	CG	0.75	0.9	0.778	0.867	0.938	0.778	0.809333	0.861	0.0516667	0.473026
chr17	58853988	+	CG	0.769	0.75	0.929	1	1	1	0.816	1	0.184	0.0834383
chr17	58853989	-	CG	0.933	0.9	0.75	0.867	0.875	0.889	0.861	0.877	0.016	0.803648
chr17	58854009	+	CG	0.769	0.6	0.917	0.75	1	0.875	0.762	0.875	0.113	0.390128
chr17	58854010	-	CG	0.867	0.8	0.7	0.769	0.895	1	0.789	0.888	0.099	0.302375
chr17	58854015	+	CG	0.75	1	0.769	0.75	1	0.875	0.839667	0.875	0.0353333	0.760141
chr17	58854016	-	CG	0.786	0.727	0.7	0.538	0.833	0.818	0.737667	0.729667	-0.008	0.942279
chr17	58854020	+	CG	0.833	1	0.857	1	1	1	0.896667	1	0.103333	0.185939
chr17	58854021	-	CG	0.923	0.727	0.8	1	0.941	1	0.816667	0.980333	0.163667	0.0908139
chr17	58854029	+	CG	0.9	1	0.929	1	1	1	0.943	1	0.057	0.194998
chr17	58854030	-	CG	0.929	1	0.667	0.917	0.882	1	0.865333	0.933	0.0676667	0.581169
chr17	58854062	+	CG	0.6	0.5	0.875	1	1	0.9	0.658333	0.966667	0.308333	0.100523
chr17	58854063	-	CG	0.846	0.75	0.875	0.889	0.941	0.9	0.823667	0.91	0.0863333	0.136308
chr17	58854087	+	CG	0.833	0.857	0.9	1	0.714	1	0.863333	0.904667	0.0413333	0.709524
chr17	58854088	-	CG	1	0.909	0.857	0.9	0.8	1	0.922	0.9	-0.022	0.774396
chr17	58854097	+	CG	0.857	1	1	1	1	1	0.952333	1	0.0476667	0.42265
chr17	58854098	-	CG	1	1	0.857	1	1	1	0.952333	1	0.0476667	0.42265
chr17	58854115	+	CG	0.833	0.75	0.889	1	1	1	0.824	1	0.176	0.0488108
chr17	58854116	-	CG	1	1	1	1	1	1	1	1	0	NA
chr17	58854121	+	CG	0.4	0.625	0.778	0.6	0.714	1	0.601	0.771333	0.170333	0.352426
chr17	58854122	-	CG	0.833	0.667	0.833	0.8	0.909	1	0.777667	0.903	0.125333	0.192506
chr17	58854140	+	CG	1	0.833	1	1	1	1	0.944333	1	0.0556667	0.42265
chr17	58854141	-	CG	0.889	1	1	1	1	1	0.963	1	0.037	0.42265
chr17	58854282	+	CG	1	1	0.923	1	1	0.909	0.974333	0.969667	-0.00466667	0.912316
chr17	58854283	-	CG	0.8	1	0.8	1	0.692	1	0.866667	0.897333	0.0306667	0.816451
chr17	58854336	+	CG	1	1	0.889	0.733	0.875	0.85	0.963	0.819333	-0.143667	0.0679991
chr17	58854337	-	CG	0.667	1	0.889	1	1	1	0.852	1	0.148	0.269703
chr17	58854361	+	CG	1	1	1	0.895	1	0.95	1	0.948333	-0.0516667	0.230511
chr17	58854362	-	CG	0.833	1	1	1	0.875	1	0.944333	0.958333	0.014	0.850994
chr17	58854378	+	CG	0.9	1	0.737	0.722	0.867	0.9	0.879	0.829667	-0.0493333	0.630719
chr17	58854379	-	CG	0.857	1	0.833	1	0.9	1	0.896667	0.966667	0.07	0.331331
chr17	58854394	+	CG	0.909	0.929	0.95	0.895	0.875	1	0.929333	0.923333	-0.006	0.893981
chr17	58854395	-	CG	1	1	0.909	1	0.9	0.909	0.969667	0.936333	-0.0333333	0.491431
chr17	58854405	+	CG	1	0.929	0.85	0.882	0.882	0.957	0.926333	0.907	-0.0193333	0.723394
chr17	58854406	-	CG	0.571	1	0.909	0.667	1	1	0.826667	0.889	0.0623333	0.73485
chr17	58854458	+	CG	0.917	0.667	0.688	0.692	0.867	0.652	0.757333	0.737	-0.0203333	0.854535
chr17	58854459	-	CG	0.667	0.5	0.615	0.6	0.5	0.9	0.594	0.666667	0.0726667	0.619603
chr17	58854480	+	CG	0.8	0.556	0.615	0.833	0.889	0.833	0.657	0.851667	0.194667	0.110057
chr17	58854481	-	CG	0.75	1	0.909	0.833	0.833	1	0.886333	0.888667	0.00233333	0.98103
chr17	58854552	+	CG	0.4	0.75	0.6	0.542	0.769	0.667	0.583333	0.659333	0.076	0.568658
chr17	58854553	-	CG	0.5	1	0.917	0.875	0.538	0.5	0.805667	0.637667	-0.168	0.441068
chr17	58854590	+	CG	0.5	0.571	0.571	0.655	0.571	0.7	0.547333	0.642	0.0946667	0.114165
chr17	58854703	+	CG	0.824	0.95	0.886	0.808	1	0.867	0.886667	0.891667	0.005	0.945039
chr17	58854704	-	CG	0.846	1	0.917	1	0.75	1	0.921	0.916667	-0.00433333	0.966249
chr17	58854718	+	CG	0.941	0.909	0.941	0.96	1	0.967	0.930333	0.975667	0.0453333	0.0509763
chr17	58854719	-	CG	1	1	0.923	0.833	0.923	1	0.974333	0.918667	-0.0556667	0.382383
chr17	58854843	+	CG	0.846	0.957	0.964	0.875	0.895	0.966	0.922333	0.912	-0.0103333	0.838256
chr17	58854844	-	CG	0.923	1	0.938	0.929	0.895	0.944	0.953667	0.922667	-0.031	0.336911
chr17	58854904	+	CG	0.909	0.773	0.967	0.812	0.875	0.909	0.883	0.865333	-0.0176667	0.801276
chr17	58854905	-	CG	0.846	0.875	0.938	0.909	0.889	0.867	0.886333	0.888333	0.002	0.950945
chr17	58854918	+	CG	0.87	0.857	1	0.938	0.933	1	0.909	0.957	0.048	0.415208
chr17	58854919	-	CG	1	1	0.867	1	1	0.929	0.955667	0.976333	0.0206667	0.708056
chr17	58854955	+	CG	0.818	0.75	0.889	0.933	0.625	0.826	0.819	0.794667	-0.0243333	0.822618
chr17	58854956	-	CG	0.917	0.818	0.833	1	0.909	0.929	0.856	0.946	0.09	0.0960254
chr17	58855013	+	CG	0.773	0.583	0.867	0.99	0.75	0.938	0.741	0.892667	0.151667	0.244336
chr17	58855014	-	CG	0.75	0.667	0.739	0.909	0.889	0.812	0.718667	0.87	0.151333	0.0189891
chr17	58855051	+	CG	0.81	0.769	0.875	1	0.875	0.571	0.818	0.815333	-0.00266667	0.985441
chr17	58855052	-	CG	1	0.778	0.955	0.917	0.8	0.7	0.911	0.805667	-0.105333	0.317914
chr17	58855152	+	CG	0.952	0.905	1	1	0.9	1	0.952333	0.966667	0.0143333	0.757103
chr17	58855153	-	CG	0.923	0.917	0.857	1	0.938	0.947	0.899	0.961667	0.0626667	0.0940899
chr17	58855160	+	CG	0.895	0.773	0.905	1	0.824	1	0.857667	0.941333	0.0836667	0.317982
chr17	58855161	-	CG	0.833	1	0.833	0.8	0.941	0.944	0.888667	0.895	0.00633333	0.935293
chr17	58855168	+	CG	0.938	0.958	1	0.933	0.941	0.952	0.965333	0.942	-0.0233333	0.329377
chr17	58855169	-	CG	1	0.923	0.917	0.929	1	1	0.946667	0.976333	0.0296667	0.453293
chr17	58855270	+	CG	0.941	0.895	0.955	1	0.941	1	0.930333	0.980333	0.05	0.135368
chr17	58855271	-	CG	1	1	0.857	1	0.889	0.95	0.952333	0.946333	-0.006	0.92254
chr17	58855277	+	CG	0.941	0.95	1	1	1	0.8	0.963667	0.933333	-0.0303333	0.698695
chr17	58855278	-	CG	1	1	0.857	1	1	0.955	0.952333	0.985	0.0326667	0.570579
chr17	58855293	+	CG	1	1	1	0.882	0.944	1	1	0.942	-0.058	0.230871
chr17	58855294	-	CG	1	1	0.875	1	1	0.957	0.958333	0.985667	0.0273333	0.587554
chr17	58855320	+	CG	1	0.889	1	1	0.947	1	0.963	0.982333	0.0193333	0.670813
chr17	58855321	-	CG	0.917	0.917	1	1	1	1	0.944667	1	0.0553333	0.183503
chr17	58855327	+	CG	1	0.889	0.944	1	1	0.938	0.944333	0.979333	0.035	0.41874
chr17	58855328	-	CG	1	1	1	1	1	1	1	1	0	NA
chr17	58855332	+	CG	0.95	0.882	1	1	1	1	0.944	1	0.056	0.243151
chr17	58855333	-	CG	1	1	1	1	0.875	0.947	1	0.940667	-0.0593333	0.243081
chr17	58855363	+	CG	0.952	1	1	1	1	0.938	0.984	0.979333	-0.00466667	0.867485
chr17	58855364	-	CG	0.909	1	1	0.889	1	0.909	0.969667	0.932667	-0.037	0.464
chr17	58855369	+	CG	0.952	1	0.889	0.9	1	0.938	0.947	0.946	-0.001	0.982725
chr17	58855370	-	CG	1	0.889	1	1	1	0.95	0.963	0.983333	0.0203333	0.653294
chr17	58855379	+	CG	0.957	0.938	0.95	0.95	0.917	0.933	0.948333	0.933333	-0.015	0.26117
chr17	58855380	-	CG	0.8	1	1	0.889	1	1	0.933333	0.963	0.0296667	0.722213
chr17	58855387	+	CG	1	1	0.895	0.842	0.96	1	0.965	0.934	-0.031	0.629023
chr17	58855388	-	CG	1	1	1	1	1	0.944	1	0.981333	-0.0186667	0.42265
chr17	58855402	+	CG	0.913	0.938	0.952	1	0.917	0.933	0.934333	0.95	0.0156667	0.61616
chr17	58855403	-	CG	1	0.875	0.778	1	0.889	0.923	0.884333	0.937333	0.053	0.516215
chr17	58855418	+	CG	1	1	0.95	0.941	1	0.846	0.983333	0.929	-0.0543333	0.351866
chr17	58855419	-	CG	1	1	1	1	1	1	1	1	0	NA
chr17	58855437	+	CG	1	1	1	0.929	1	1	1	0.976333	-0.0236667	0.42265
chr17	58855438	-	CG	0.923	1	0.889	1	1	1	0.937333	1	0.0626667	0.196537
chr17	58855449	+	CG	0.952	1	0.941	1	0.947	0.923	0.964333	0.956667	-0.00766667	0.80569
chr17	58855450	-	CG	1	1	1	1	1	1	1	1	0	NA
chr17	58855471	+	CG	1	0.766	0.867	0.923	1	1	0.877667	0.974333	0.0966667	0.288344
chr17	58855472	-	CG	0.273	0.429	1	1	1	0.385	0.567333	0.795	0.227667	0.492317
chr17	58855477	+	CG	0.952	1	1	1	1	1	0.984	1	0.016	0.42265
chr17	58855478	-	CG	0.909	1	1	0.875	1	1	0.969667	0.958333	-0.0113333	0.837677
chr17	58855481	+	CG	1	0.923	0.929	1	1	1	0.950667	1	0.0493333	0.184174
chr17	58855482	-	CG	0.9	0.875	0.75	0.889	1	1	0.841667	0.963	0.121333	0.113834
chr17	58855508	+	CG	0.955	0.917	1	0.7	0.938	0.867	0.957333	0.835	-0.122333	0.218796
chr17	58855509	-	CG	1	1	1	1	0.9	0.909	1	0.936333	-0.0636667	0.184408
chr17	58855520	+	CG	1	1	1	1	1	0.923	1	0.974333	-0.0256667	0.42265
chr17	58855521	-	CG	1	1	1	1	0.857	1	1	0.952333	-0.0476667	0.42265
chr17	58855522	+	CG	1	1	1	1	1	1	1	1	0	NA
chr17	58855523	-	CG	1	1	0.889	1	1	1	0.963	1	0.037	0.42265
chr17	58855524	+	CG	0.95	0.917	1	1	0.941	0.846	0.955667	0.929	-0.0266667	0.636073
chr17	58855525	-	CG	1	1	1	1	0.857	1	1	0.952333	-0.0476667	0.42265
chr17	58855545	+	CG	1	0.727	0.938	1	0.933	1	0.888333	0.977667	0.0893333	0.394092
chr17	58855546	-	CG	0.333	0.25	0.8	1	0.889	0.308	0.461	0.732333	0.271333	0.381429
chr17	58855639	+	CG	1	0.944	1	1	0.952	0.933	0.981333	0.961667	-0.0196667	0.511457
chr17	58855640	-	CG	0.833	1	1	0.8	0.889	0.867	0.944333	0.852	-0.0923333	0.235537
chr17	58855667	+	CG	1	0.895	1	1	1	0.938	0.965	0.979333	0.0143333	0.746046
chr17	58855668	-	CG	0.857	1	0.875	0.917	0.889	0.867	0.910667	0.891	-0.0196667	0.711388
chr17	58855686	+	CG	0.929	1	1	1	1	1	0.976333	1	0.0236667	0.42265
chr17	58855687	-	CG	1	1	1	0.846	1	0.938	1	0.928	-0.072	0.248804
chr17	58855699	+	CG	0.929	0.944	0.929	1	1	1	0.934	1	0.066	0.00569027
chr17	58855700	-	CG	1	1	0.778	0.923	1	0.929	0.926	0.950667	0.0246667	0.776931
chr17	58855718	+	CG	1	0.933	0.846	0.857	0.905	0.909	0.926333	0.890333	-0.036	0.513213
chr17	58855719	-	CG	0.714	1	1	0.867	0.889	0.929	0.904667	0.895	-0.00966667	0.929191
chr17	58855762	+	CG	0.929	1	0.917	1	1	1	0.948667	1	0.0513333	0.185971
chr17	58855763	-	CG	1	0.875	1	1	1	1	0.958333	1	0.0416667	0.42265
chr17	58855765	+	CG	1	0.917	1	1	0.947	0.909	0.972333	0.952	-0.0203333	0.623073
chr17	58855766	-	CG	1	0.875	0.909	0.857	0.833	1	0.928	0.896667	-0.0313333	0.6531
chr17	58855772	+	CG	1	0.818	0.923	1	1	1	0.913667	1	0.0863333	0.243321
chr17	58855773	-	CG	1	0.933	1	0.929	0.833	0.9	0.977667	0.887333	-0.0903333	0.0703443
chr17	58855810	+	CG	0.818	1	0.818	0.833	1	0.778	0.878667	0.870333	-0.00833333	0.93087
chr17	58855811	-	CG	0.833	1	0.818	0.923	0.846	1	0.883667	0.923	0.0393333	0.62205
chr17	58855840	+	CG	1	1	1	0.929	0.889	0.929	1	0.915667	-0.0843333	0.0240967
chr17	58855841	-	CG	1	0.933	1	1	1	0.909	0.977667	0.969667	-0.008	0.84306
chr17	58855849	+	CG	1	1	1	1	0.882	0.944	1	0.942	-0.058	0.230871
chr17	58855850	-	CG	1	0.857	0.9	0.875	1	1	0.919	0.958333	0.0393333	0.544184
chr17	58855867	+	CG	1	1	1	1	1	1	1	1	0	NA
chr17	58855868	-	CG	1	1	1	1	1	1	1	1	0	NA
chr17	58855873	+	CG	1	1	1	1	1	0.944	1	0.981333	-0.0186667	0.42265
chr17	58855874	-	CG	1	1	0.818	1	0.929	0.917	0.939333	0.948667	0.00933333	0.897348
chr17	58855906	+	CG	0.889	1	0.889	0.789	0.867	0.889	0.926	0.848333	-0.0776667	0.18259
chr17	58855907	-	CG	1	0.882	1	0.909	0.867	1	0.960667	0.925333	-0.0353333	0.559435
chr17	58855916	+	CG	0.818	1	0.889	1	0.867	0.944	0.902333	0.937	0.0346667	0.627155
chr17	58855917	-	CG	1	1	1	1	1	1	1	1	0	NA
chr17	58855921	+	CG	0.909	1	0.778	0.889	0.933	0.889	0.895667	0.903667	0.008	0.913776
chr17	58855922	-	CG	0.75	0.938	1	0.909	0.909	1	0.896	0.939333	0.0433333	0.634682
chr17	58855934	+	CG	1	1	1	0.867	1	0.882	1	0.916333	-0.0836667	0.184958
chr17	58855935	-	CG	1	1	0.909	1	1	0.917	0.969667	0.972333	0.00266667	0.951353
chr17	58855949	+	CG	1	1	0.778	0.857	1	0.769	0.926	0.875333	-0.0506667	0.639377
chr17	58855950	-	CG	1	1	1	1	1	1	1	1	0	NA
chr17	58855956	+	CG	1	1	1	0.833	1	0.923	1	0.918667	-0.0813333	0.233953
chr17	58855957	-	CG	1	1	0.923	1	1	0.909	0.974333	0.969667	-0.00466667	0.912316
chr17	58855960	+	CG	1	1	0.9	0.833	1	0.929	0.966667	0.920667	-0.046	0.482623
chr17	58855961	-	CG	1	0.923	0.917	0.909	0.778	0.875	0.946667	0.854	-0.0926667	0.1322
chr17	58856000	+	CG	0.929	1	1	0.889	1	0.833	0.976333	0.907333	-0.069	0.297999
chr17	58856001	-	CG	1	1	0.917	0.8	1	0.9	0.972333	0.9	-0.0723333	0.343993
chr17	58856015	+	CG	1	1	1	1	1	1	1	1	0	NA
chr17	58856016	-	CG	0.857	0.909	0.917	1	1	1	0.894333	1	0.105667	0.0302545
chr17	58856032	+	CG	1	0.952	0.917	1	0.938	0.923	0.956333	0.953667	-0.00266667	0.940693
chr17	58856033	-	CG	1	1	1	1	1	1	1	1	0	NA
chr17	58856060	+	CG	1	1	1	1	0.889	0.923	1	0.937333	-0.0626667	0.196537
chr17	58856061	-	CG	0.889	0.889	0.769	1	0.875	1	0.849	0.958333	0.109333	0.131426
chr17	58856116	+	CG	0.944	1	0.917	1	1	0.933	0.953667	0.977667	0.024	0.508967
chr17	58856117	-	CG	1	0.857	0.909	1	0.917	0.667	0.922	0.861333	-0.0606667	0.619247
chr17	58856148	+	CG	0.32	0.455	1	0.9	1	0.357	0.591667	0.752333	0.160667	0.607067
chr17	58856149	-	CG	1	1	0.917	0.923	0.923	1	0.972333	0.948667	-0.0236667	0.564779
chr17	58856155	+	CG	1	0.957	1	1	1	0.938	0.985667	0.979333	-0.00633333	0.815031
chr17	58856156	-	CG	1	1	1	1	1	1	1	1	0	NA
chr17	58856162	+	CG	0.917	0.955	1	1	0.941	1	0.957333	0.980333	0.023	0.501065
chr17	58856163	-	CG	0.947	0.8	0.933	1	0.933	1	0.893333	0.977667	0.0843333	0.206855
chr17	58856204	-	CG	0	0	0.938	1	0.933	0.35	0.312667	0.761	0.448333	0.30685
chr17	58856258	+	CG	1	0.957	0.938	1	0.941	1	0.965	0.980333	0.0153333	0.599177
chr17	58856259	-	CG	0.923	0.909	0.9	0.938	1	0.962	0.910667	0.966667	0.056	0.0758792
chr17	58856267	+	CG	0.905	1	0.933	0.95	1	1	0.946	0.983333	0.0373333	0.331287
chr17	58856268	-	CG	1	1	1	0.929	1	0.962	1	0.963667	-0.0363333	0.218533
chr17	58856302	+	CG	0.692	1	0.944	0.812	0.75	0.786	0.878667	0.782667	-0.096	0.418221
chr17	58856303	-	CG	1	1	0.947	0.833	0.929	0.966	0.982333	0.909333	-0.073	0.198792
chr17	58856350	+	CG	1	1	1	1	1	0.909	1	0.969667	-0.0303333	0.42265
chr17	58856351	-	CG	0.929	0.818	1	0.8	1	1	0.915667	0.933333	0.0176667	0.84625
chr17	58856399	+	CG	0.857	0.8	0.923	1	0.833	0.929	0.86	0.920667	0.0606667	0.374146
chr17	58856400	-	CG	0.8	0.9	0.917	1	1	1	0.872333	1	0.127667	0.0729055
chr17	58856407	+	CG	0.75	0.917	0.833	0.857	0.429	0.769	0.833333	0.685	-0.148333	0.377173
chr17	58856408	-	CG	0.8	0.7	0.615	0.75	1	0.688	0.705	0.812667	0.107667	0.394296
chr17	58856447	+	CG	0.9	0.833	0.889	1	0.714	1	0.874	0.904667	0.0306667	0.780736
chr17	58856448	-	CG	1	0.9	1	1	1	1	0.966667	1	0.0333333	0.42265
chr17	58856450	+	CG	1	1	1	1	1	1	1	1	0	NA
chr17	58856451	-	CG	1	1	1	1	1	1	1	1	0	NA
chr17	58856464	+	CG	1	1	1	1	1	0.909	1	0.969667	-0.0303333	0.42265
chr17	58856465	-	CG	0.889	1	1	1	1	1	0.963	1	0.037	0.42265
chr17	58856480	+	CG	0.917	0.857	1	1	0.8	1	0.924667	0.933333	0.00866667	0.918392
chr17	58856481	-	CG	0.889	1	1	1	0.857	0.933	0.963	0.93	-0.033	0.584191
chr17	58856504	+	CG	0.462	0.5	1	1	0.75	0.429	0.654	0.726333	0.0723333	0.777721
chr17	58856505	-	CG	0.802	1	1	0.857	1	1	0.934	0.952333	0.0183333	0.833901
chr17	58856513	+	CG	1	1	1	1	1	1	1	1	0	NA
chr17	58856514	-	CG	0.875	0.75	1	0.857	1	0.889	0.875	0.915333	0.0403333	0.662018
chr17	58856531	+	CG	1	1	0.917	1	0.8	1	0.972333	0.933333	-0.039	0.630764
chr17	58856532	-	CG	1	0.8	0.9	0.9	1	0.889	0.9	0.929667	0.0296667	0.68816
chr17	58856542	+	CG	1	1	0.923	0.889	1	0.714	0.974333	0.867667	-0.106667	0.328215
chr17	58856543	-	CG	1	0.833	0.917	1	1	1	0.916667	1	0.0833333	0.226025
chr17	58856564	+	CG	1	1	1	0.909	1	1	1	0.969667	-0.0303333	0.42265
chr17	58856565	-	CG	1	1	0.933	1	1	1	0.977667	1	0.0223333	0.42265
chr17	58856572	+	CG	0.9	0.889	1	1	1	1	0.929667	1	0.0703333	0.184611
chr17	58856573	-	CG	1	1	0.929	1	0.9	0.846	0.976333	0.915333	-0.061	0.316534
chr17	58856574	+	CG	1	1	1	0.909	1	0.833	1	0.914	-0.086	0.216778
chr17	58856575	-	CG	1	1	0.929	1	1	0.846	0.976333	0.948667	-0.0276667	0.660126
chr17	58856581	+	CG	0.9	1	0.818	0.9	1	1	0.906	0.966667	0.0606667	0.394502
chr17	58856582	-	CG	1	0.9	1	1	0.8	0.846	0.966667	0.882	-0.0846667	0.30477
chr17	58856585	+	CG	1	0.889	1	0.9	1	1	0.963	0.966667	0.00366667	0.944879
chr17	58856586	-	CG	1	1	1	1	0.8	0.923	1	0.907667	-0.0923333	0.253765
chr17	58856589	+	CG	1	1	1	0.889	1	1	1	0.963	-0.037	0.42265
chr17	58856590	-	CG	1	1	1	1	0.9	0.923	1	0.941	-0.059	0.190311
chr17	58856598	+	CG	1	1	0.917	1	1	1	0.972333	1	0.0276667	0.42265
chr17	58856599	-	CG	1	1	1	1	1	0.933	1	0.977667	-0.0223333	0.42265
chr17	58856604	+	CG	0.781	1	1	0.875	1	1	0.927	0.958333	0.0313333	0.732801
chr17	58856605	-	CG	0.6	0.375	1	1	1	0.533	0.658333	0.844333	0.186	0.482753
chr17	58856606	+	CG	1	1	1	0.875	1	0.857	1	0.910667	-0.0893333	0.185339
chr17	58856607	-	CG	1	1	1	1	0.9	1	1	0.966667	-0.0333333	0.42265
chr17	58856609	+	CG	1	1	1	1	0.875	1	1	0.958333	-0.0416667	0.42265
chr17	58856610	-	CG	1	1	1	1	1	0.929	1	0.976333	-0.0236667	0.42265
chr17	58856615	+	CG	1	1	0.846	1	1	1	0.948667	1	0.0513333	0.42265
chr17	58856616	-	CG	1	1	1	1	1	0.857	1	0.952333	-0.0476667	0.42265
chr17	58856620	+	CG	1	1	0.917	0.889	1	0.857	0.972333	0.915333	-0.057	0.339774
chr17	58856621	-	CG	1	1	1	1	1	0.929	1	0.976333	-0.0236667	0.42265
chr17	58856622	+	CG	1	1	0.846	1	1	1	0.948667	1	0.0513333	0.42265
chr17	58856623	-	CG	1	1	0.929	1	1	0.929	0.976333	0.976333	0	1
chr17	58856627	+	CG	1	0.929	0.833	1	1	1	0.920667	1	0.0793333	0.242783
chr17	58856628	-	CG	1	1	1	1	0.7	0.857	1	0.852333	-0.147667	0.230405
chr17	58856632	+	CG	1	1	0.818	0.75	0.9	1	0.939333	0.883333	-0.056	0.586848
chr17	58856633	-	CG	1	0.909	0.846	1	0.9	0.867	0.918333	0.922333	0.004	0.950062
chr17	58856639	+	CG	1	0.933	0.667	0.875	0.9	0.833	0.866667	0.869333	0.00266667	0.98165
chr17	58856640	-	CG	1	1	0.8	1	1	0.857	0.933333	0.952333	0.019	0.829168
chr17	58856668	+	CG	1	1	1	1	1	1	1	1	0	NA
chr17	58856669	-	CG	1	1	0.857	0.714	1	1	0.952333	0.904667	-0.0476667	0.685598
chr17	58856687	+	CG	0.857	0.882	0.9	0.9	0.875	0.75	0.879667	0.841667	-0.038	0.502691
chr17	58856688	-	CG	1	0.9	0.857	1	0.75	0.636	0.919	0.795333	-0.123667	0.373448
chr17	58856692	+	CG	1	0.941	0.9	0.909	0.75	0.25	0.947	0.636333	-0.310667	0.256684
chr17	58856693	-	CG	1	0.8	1	0.8	0.75	0.7	0.933333	0.75	-0.183333	0.0943912
chr17	58856698	+	CG	1	1	1	1	1	1	1	1	0	NA
chr17	58856699	-	CG	1	1	1	1	1	0.875	1	0.958333	-0.0416667	0.42265
chr17	58856714	+	CG	1	1	1	0.8	1	1	1	0.933333	-0.0666667	0.42265
chr17	58856715	-	CG	1	0.889	0.9	1	1	1	0.929667	1	0.0703333	0.184611
chr17	58856730	+	CG	1	1	1	1	0.875	1	1	0.958333	-0.0416667	0.42265
chr17	58856731	-	CG	1	0.9	1	1	0.857	1	0.966667	0.952333	-0.0143333	0.818833
chr17	58856764	+	CG	1	1	1	0.857	1	1	1	0.952333	-0.0476667	0.42265
chr17	58856765	-	CG	1	1	0.9	1	1	1	0.966667	1	0.0333333	0.42265
chr17	58856766	+	CG	1	1	1	1	1	0.857	1	0.952333	-0.0476667	0.42265
chr17	58856767	-	CG	1	1	1	1	1	1	1	1	0	NA
chr17	58856768	+	CG	1	1	1	1	0.833	1	1	0.944333	-0.0556667	0.42265
chr17	58856769	-	CG	1	1	1	1	1	1	1	1	0	NA
chr17	58856788	+	CG	1	1	1	0.857	1	1	1	0.952333	-0.0476667	0.42265
chr17	58856789	-	CG	1	1	1	1	0.875	0.889	1	0.921333	-0.0786667	0.184936
chr17	58856794	+	CG	1	1	1	0.857	1	1	1	0.952333	-0.0476667	0.42265
chr17	58856795	-	CG	0.875	1	1	1	1	1	0.958333	1	0.0416667	0.42265
chr17	58856807	+	CG	1	1	1	1	1	1	1	1	0	NA
chr17	58856808	-	CG	0.778	1	1	1	1	0.778	0.926	0.926	0	1
chr17	58856821	+	CG	1	1	1	1	1	1	1	1	0	NA
chr17	58856822	-	CG	1	1	1	0.833	1	1	1	0.944333	-0.0556667	0.42265
chr17	58856830	+	CG	1	1	1	1	1	1	1	1	0	NA
chr17	58856831	-	CG	1	0.714	0.833	1	0.833	1	0.849	0.944333	0.0953333	0.401108
chr17	58856858	+	CG	0.857	1	1	0.857	1	0.923	0.952333	0.926667	-0.0256667	0.705333
chr17	58856859	-	CG	1	1	1	1	1	1	1	1	0	NA
chr17	58856877	+	CG	1	1	0.8	1	0.875	0.8	0.933333	0.891667	-0.0416667	0.663007
chr17	58856878	-	CG	1	0.889	1	1	1	1	0.963	1	0.037	0.42265
chr17	58856884	+	CG	1	1	1	1	0.875	1	1	0.958333	-0.0416667	0.42265
chr17	58856885	-	CG	1	0.9	0.889	0.8	1	1	0.929667	0.933333	0.00366667	0.964252
chr17	58856889	+	CG	0.909	1	0.833	1	0.889	1	0.914	0.963	0.049	0.468465
chr17	58856890	-	CG	1	1	0.875	1	0.867	0.9	0.958333	0.922333	-0.036	0.566865
chr17	58856891	+	CG	1	1	1	1	1	1	1	1	0	NA
chr17	58856892	-	CG	1	1	1	1	1	1	1	1	0	NA
chr17	58856898	+	CG	1	1	1	1	1	0.9	1	0.966667	-0.0333333	0.42265
chr17	58856899	-	CG	1	1	1	0.8	0.933	1	1	0.911	-0.089	0.269157
chr17	58856911	+	CG	1	1	0.8	1	1	0.889	0.933333	0.963	0.0296667	0.722213
chr17	58856912	-	CG	1	0.9	1	0.714	0.938	1	0.966667	0.884	-0.0826667	0.449337
chr17	58856922	+	CG	0.923	1	1	0.778	0.9	0.9	0.974333	0.859333	-0.115	0.0870147
chr17	58856923	-	CG	0.857	0.9	1	0.857	0.933	1	0.919	0.93	0.011	0.861563
chr17	58856926	+	CG	1	1	1	1	1	1	1	1	0	NA
chr17	58856927	-	CG	0.8	1	1	0.857	0.867	0.9	0.933333	0.874667	-0.0586667	0.473176
chr17	58856946	+	CG	1	1	0.833	1	0.833	1	0.944333	0.944333	0	1
chr17	58856947	-	CG	1	1	1	1	0.929	1	1	0.976333	-0.0236667	0.42265
chr17	58856948	+	CG	0.929	1	1	1	1	1	0.976333	1	0.0236667	0.42265
chr17	58856949	-	CG	1	1	0.889	1	0.929	1	0.963	0.976333	0.0133333	0.779093
chr17	58856952	+	CG	0.929	1	1	1	0.833	1	0.976333	0.944333	-0.032	0.637157
chr17	58856953	-	CG	1	1	1	0.833	1	0.923	1	0.918667	-0.0813333	0.233953
chr17	58856971	+	CG	1	1	1	1	1	0.889	1	0.963	-0.037	0.42265
chr17	58856972	-	CG	0.833	1	0.9	0.75	1	0.875	0.911	0.875	-0.036	0.702978
chr17	58856977	+	CG	1	1	1	1	1	1	1	1	0	NA
chr17	58856978	-	CG	1	0.833	1	1	1	1	0.944333	1	0.0556667	0.42265
chr17	58856979	+	CG	1	1	1	1	1	1	1	1	0	NA
chr17	58856980	-	CG	1	0.75	1	1	1	0.875	0.916667	0.958333	0.0416667	0.685598
chr17	58857026	+	CG	0.917	1	1	1	1	1	0.972333	1	0.0276667	0.42265
chr17	58857027	-	CG	1	1	1	0.8	1	1	1	0.933333	-0.0666667	0.42265
chr17	58857028	+	CG	1	1	0.8	1	1	1	0.933333	1	0.0666667	0.42265
chr17	58857029	-	CG	1	0.875	1	1	1	1	0.958333	1	0.0416667	0.42265
chr17	58857035	+	CG	1	1	1	1	1	1	1	1	0	NA
chr17	58857036	-	CG	1	1	1	1	1	1	1	1	0	NA
chr17	58857067	+	CG	1	1	1	1	1	1	1	1	0	NA
chr17	58857068	-	CG	0.857	0.889	0.909	1	1	1	0.885	1	0.115	0.0169025
chr17	58857086	+	CG	0.833	1	1	1	1	0.909	0.944333	0.969667	0.0253333	0.715456
chr17	58857087	-	CG	0.875	1	1	0.857	1	0.929	0.958333	0.928667	-0.0296667	0.639603
chr17	58857109	+	CG	1	0.9	1	0.917	1	0.786	0.966667	0.901	-0.0656667	0.420016
chr17	58857110	-	CG	0.833	1	1	1	1	0.917	0.944333	0.972333	0.028	0.683624
chr17	58857120	+	CG	0.917	1	1	1	1	0.875	0.972333	0.958333	-0.014	0.795392
chr17	58857121	-	CG	1	0.923	0.9	0.8	1	1	0.941	0.933333	-0.00766667	0.92366
chr17	58857126	+	CG	0.923	1	0.9	1	0.846	0.941	0.941	0.929	-0.012	0.836763
chr17	58857127	-	CG	0.9	1	1	0.9	1	1	0.966667	0.966667	0	1
chr17	58857138	+	CG	1	0.909	1	0.938	1	0.938	0.969667	0.958667	-0.011	0.781226
chr17	58857139	-	CG	1	1	0.929	1	1	0.909	0.976333	0.969667	-0.00666667	0.871319
chr17	58857153	+	CG	1	0.909	0.923	1	1	0.941	0.944	0.980333	0.0363333	0.357762
chr17	58857154	-	CG	0.818	0.846	1	1	0.889	1	0.888	0.963	0.075	0.338617
chr17	58857190	+	CG	0.923	1	0.923	1	0.85	1	0.948667	0.95	0.00133333	0.98257
chr17	58857191	-	CG	0.8	0.846	0.938	0.8	0.9	1	0.861333	0.9	0.0386667	0.615996
chr17	58857279	+	CG	0.846	1	1	1	1	0.9	0.948667	0.966667	0.018	0.7856
chr17	58857280	-	CG	0.929	0.909	1	1	1	0.909	0.946	0.969667	0.0236667	0.595121
chr17	58857301	+	CG	0.917	0.875	0.933	0.947	0.933	0.842	0.908333	0.907333	-0.001	0.98022
chr17	58857302	-	CG	0.9	1	1	1	1	1	0.966667	1	0.0333333	0.42265
chr17	58857466	-	CG	0	0	0.909	1	1	0.474	0.303	0.824667	0.521667	0.227319
chr17	58857480	+	CG	1	0.938	1	0.952	1	1	0.979333	0.984	0.00466667	0.867485
chr17	58857481	-	CG	1	1	1	0.909	1	1	1	0.969667	-0.0303333	0.42265
chr17	58857495	+	CG	0.955	0.938	1	1	1	1	0.964333	1	0.0356667	0.193617
chr17	58857496	-	CG	1	0.875	0.917	1	0.944	1	0.930667	0.981333	0.0506667	0.307235
chr17	58857518	+	CG	1	1	0.889	0.882	1	1	0.963	0.960667	-0.00233333	0.967613
chr17	58857519	-	CG	1	1	1	0.923	1	1	1	0.974333	-0.0256667	0.42265
chr17	58857531	+	CG	1	1	0.938	1	1	1	0.979333	1	0.0206667	0.42265
chr17	58857532	-	CG	1	1	1	1	1	0.952	1	0.984	-0.016	0.42265
chr17	58857533	+	CG	1	0.938	1	1	0.9	1	0.979333	0.966667	-0.0126667	0.765905
chr17	58857534	-	CG	1	1	0.941	1	1	1	0.980333	1	0.0196667	0.42265
chr17	58857544	+	CG	1	0.857	1	1	0.85	0.778	0.952333	0.876	-0.0763333	0.40356
chr17	58857545	-	CG	1	1	0.947	1	1	0.957	0.982333	0.985667	0.00333333	0.890884
chr17	58857564	+	CG	1	1	1	1	1	1	1	1	0	NA
chr17	58857565	-	CG	0.952	1	1	1	1	1	0.984	1	0.016	0.42265
chr17	58857571	+	CG	0.923	1	1	0.909	1	1	0.974333	0.969667	-0.00466667	0.912316
chr17	58857572	-	CG	0.9	0.818	0.947	1	0.944	0.913	0.888333	0.952333	0.064	0.241485
chr17	58857576	+	CG	1	1	0.9	1	1	1	0.966667	1	0.0333333	0.42265
chr17	58857577	-	CG	1	0.909	0.95	0.857	0.947	1	0.953	0.934667	-0.0183333	0.732348
chr17	58857582	+	CG	0.917	1	1	1	1	1	0.972333	1	0.0276667	0.42265
chr17	58857583	-	CG	1	0.909	1	1	0.947	1	0.969667	0.982333	0.0126667	0.740626
chr17	58857627	+	CG	1	0.909	0.889	0.933	0.833	1	0.932667	0.922	-0.0106667	0.867021
chr17	58857628	-	CG	1	1	1	1	0.944	0.85	1	0.931333	-0.0686667	0.257184
chr17	58857635	+	CG	0.889	0.727	0.667	1	0.667	1	0.761	0.889	0.128	0.389737
chr17	58857636	-	CG	0.905	0.8	1	0.889	0.778	0.941	0.901667	0.869333	-0.0323333	0.689856
chr17	58857649	+	CG	0.909	0.889	0.889	0.923	0.8	1	0.895667	0.907667	0.012	0.856318
chr17	58857650	-	CG	1	0.909	1	1	1	0.947	0.969667	0.982333	0.0126667	0.740626
chr17	58857656	+	CG	0.667	0.667	0.778	1	1	0.875	0.704	0.958333	0.254333	0.0106459
chr17	58857657	-	CG	0.75	1	0.882	0.8	0.632	0.95	0.877333	0.794	-0.0833333	0.517138
chr17	58857670	+	CG	1	0.909	0.889	0.923	1	1	0.932667	0.974333	0.0416667	0.388639
chr17	58857671	-	CG	1	1	0.867	1	0.684	0.95	0.955667	0.878	-0.0776667	0.526338
chr17	58857711	+	CG	0.833	0.889	1	0.867	1	0.889	0.907333	0.918667	0.0113333	0.868394
chr17	58857712	-	CG	1	0.889	0.923	1	0.8	0.952	0.937333	0.917333	-0.02	0.78924
chr17	58857743	+	CG	1	0.9	1	1	0.857	1	0.966667	0.952333	-0.0143333	0.818833
chr17	58857744	-	CG	1	1	0.929	0.778	0.952	0.9	0.976333	0.876667	-0.0996667	0.183517
chr17	58857745	+	CG	1	0.8	1	0.923	0.875	0.889	0.933333	0.895667	-0.0376667	0.631978
chr17	58857746	-	CG	0.875	1	0.867	1	1	0.905	0.914	0.968333	0.0543333	0.371594
chr17	58857761	+	CG	0.9	1	0.778	1	0.875	0.7	0.892667	0.858333	-0.0343333	0.76802
chr17	58857762	-	CG	0.833	1	0.812	0.778	0.684	0.706	0.881667	0.722667	-0.159	0.0988064
chr17	58857852	+	CG	1	0.6	0.917	0.667	0.636	0.769	0.839	0.690667	-0.148333	0.348686
chr17	58857853	-	CG	0.957	0.833	0.706	1	0.875	0.944	0.832	0.939667	0.107667	0.277467
chr17	58857857	+	CG	0.923	0.8	0.917	0.667	0.9	0.929	0.88	0.832	-0.048	0.639545
chr17	58857858	-	CG	0.913	0.889	0.812	0.933	0.882	0.889	0.871333	0.901333	0.03	0.446849
chr17	58857873	+	CG	0.846	0.556	0.6	0.333	0.778	0.769	0.667333	0.626667	-0.0406667	0.827293
chr17	58857874	-	CG	0.88	0.889	0.467	1	0.842	0.875	0.745333	0.905667	0.160333	0.370958
chr17	58857887	+	CG	0.929	0.8	0.727	0.5	0.556	0.833	0.818667	0.629667	-0.189	0.204188
chr17	58857888	-	CG	0.778	0.75	0.818	1	0.889	0.938	0.782	0.942333	0.160333	0.0193754
chr17	58857892	+	CG	1	1	0.727	1	0.7	0.917	0.909	0.872333	-0.0366667	0.788103
chr17	58857893	-	CG	0.958	0.8	0.909	0.917	0.889	0.933	0.889	0.913	0.024	0.66355
chr17	58857911	+	CG	0.833	0.889	0.727	1	0.909	0.818	0.816333	0.909	0.0926667	0.261536
chr17	58857912	-	CG	0.792	0.857	0.667	0.923	0.941	1	0.772	0.954667	0.182667	0.0655109
chr17	58857958	+	CG	0.933	0.889	1	0.75	0.875	0.889	0.940667	0.838	-0.102667	0.140425
chr17	58857959	-	CG	0.933	0.9	0.692	1	0.875	1	0.841667	0.958333	0.116667	0.265627
chr17	58857964	+	CG	1	0.9	1	1	1	1	0.966667	1	0.0333333	0.42265
chr17	58857965	-	CG	0.938	1	0.846	1	1	0.818	0.928	0.939333	0.0113333	0.888364
chr17	58858001	+	CG	0.833	0.857	1	0.875	0.778	1	0.896667	0.884333	-0.0123333	0.889012
chr17	58858002	-	CG	0.909	0.889	0.714	0.917	1	0.667	0.837333	0.861333	0.024	0.850232
chr17	58858012	+	CG	0.765	0.857	1	0.727	0.9	1	0.874	0.875667	0.00166667	0.988117
chr17	58858013	-	CG	0.875	0.947	0.778	0.846	0.833	0.889	0.866667	0.856	-0.0106667	0.852628
chr17	58858043	+	CG	0.812	0.857	0.75	0.727	0.75	0.5	0.806333	0.659	-0.147333	0.197906
chr17	58858044	-	CG	0.714	0.75	0.429	0.889	0.778	0.714	0.631	0.793667	0.162667	0.249203
chr17	58858046	+	CG	0.875	1	1	0.9	0.875	1	0.958333	0.925	-0.0333333	0.587276
chr17	58858047	-	CG	1	0.938	0.5	1	0.889	1	0.812667	0.963	0.150333	0.442049
chr17	58858078	+	CG	1	1	1	1	1	1	1	1	0	NA
chr17	58858079	-	CG	1	0.889	0.833	1	0.889	1	0.907333	0.963	0.0556667	0.419883
chr17	58858091	+	CG	1	1	1	0.833	0.714	1	1	0.849	-0.151	0.210297
chr17	58858092	-	CG	1	1	1	1	1	1	1	1	0	NA
chr17	58858108	+	CG	1	1	0.818	0.857	1	1	0.939333	0.952333	0.013	0.874803
chr17	58858109	-	CG	1	1	1	1	1	1	1	1	0	NA
chr17	58858119	+	CG	1	1	1	0.929	1	1	1	0.976333	-0.0236667	0.42265
chr17	58858120	-	CG	1	0.867	1	1	1	1	0.955667	1	0.0443333	0.42265
chr17	58858129	+	CG	1	1	1	0.923	1	0.909	1	0.944	-0.056	0.186324
chr17	58858130	-	CG	1	1	0.8	1	1	1	0.933333	1	0.0666667	0.42265
chr17	58858148	+	CG	0.933	1	0.818	1	1	0.833	0.917	0.944333	0.0273333	0.740446
chr17	58858149	-	CG	1	1	0.5	1	0.778	1	0.833333	0.926	0.0926667	0.649154
chr17	58858198	+	CG	1	0.867	1	1	0.929	1	0.955667	0.976333	0.0206667	0.708056
chr17	58858199	-	CG	1	1	0.833	1	0.917	0.857	0.944333	0.924667	-0.0196667	0.792063
chr17	58858204	+	CG	0.938	1	1	1	1	1	0.979333	1	0.0206667	0.42265
chr17	58858205	-	CG	0.857	1	0.833	1	0.923	0.889	0.896667	0.937333	0.0406667	0.551534
chr17	58858215	+	CG	0.938	1	1	1	1	1	0.979333	1	0.0206667	0.42265
chr17	58858216	-	CG	1	1	0.857	0.778	1	1	0.952333	0.926	-0.0263333	0.782112
chr17	58858222	+	CG	1	1	1	1	1	1	1	1	0	NA
chr17	58858223	-	CG	1	1	1	1	1	1	1	1	0	NA
chr17	58858226	+	CG	1	1	0.9	1	1	1	0.966667	1	0.0333333	0.42265
chr17	58858227	-	CG	0.75	1	1	1	1	1	0.916667	1	0.0833333	0.42265
chr17	58858260	+	CG	1	1	1	1	1	1	1	1	0	NA
chr17	58858261	-	CG	1	0.667	0.833	0.929	1	1	0.833333	0.976333	0.143	0.272642
chr17	58858263	+	CG	1	1	1	1	1	1	1	1	0	NA
chr17	58858264	-	CG	0.889	1	1	1	1	1	0.963	1	0.037	0.42265
chr17	58858266	+	CG	0.909	0.875	1	1	1	1	0.928	1	0.072	0.193434
chr17	58858267	-	CG	0.889	1	1	1	1	1	0.963	1	0.037	0.42265
chr17	58858270	+	CG	1	1	1	1	1	1	1	1	0	NA
chr17	58858271	-	CG	1	1	1	0.933	1	1	1	0.977667	-0.0223333	0.42265
chr17	58858273	+	CG	1	0.75	0.929	1	1	0.923	0.893	0.974333	0.0813333	0.391733
chr17	58858274	-	CG	1	1	1	0.933	1	0.8	1	0.911	-0.089	0.269157
chr17	58858287	+	CG	1	1	1	1	1	1	1	1	0	NA
chr17	58858288	-	CG	0.875	1	0.857	1	1	1	0.910667	1	0.0893333	0.185339
chr17	58858289	+	CG	1	1	1	1	1	1	1	1	0	NA
chr17	58858290	-	CG	1	1	1	1	1	0.75	1	0.916667	-0.0833333	0.42265
chr17	58858293	+	CG	1	0.875	1	1	0.923	1	0.958333	0.974333	0.016	0.763216
chr17	58858294	-	CG	1	1	0.9	0.875	1	1	0.966667	0.958333	-0.00833333	0.883807
chr17	58858296	+	CG	1	0.714	1	1	1	1	0.904667	1	0.0953333	0.42265
chr17	58858297	-	CG	0.25	0.8	1	0.938	0.889	0.333	0.683333	0.72	0.0366667	0.907667
chr17	58858298	+	CG	1	1	1	1	0.923	1	1	0.974333	-0.0256667	0.42265
chr17	58858299	-	CG	1	1	1	1	1	1	1	1	0	NA
chr17	58858300	+	CG	1	1	1	1	1	0.917	1	0.972333	-0.0276667	0.42265
chr17	58858301	-	CG	1	1	1	1	1	1	1	1	0	NA
chr17	58858306	+	CG	1	1	1	1	1	1	1	1	0	NA
chr17	58858307	-	CG	1	1	1	0.938	0.875	1	1	0.937667	-0.0623333	0.226235
chr17	58858329	+	CG	1	1	0.857	1	1	0.933	0.952333	0.977667	0.0253333	0.664985
chr17	58858330	-	CG	1	1	1	1	1	1	1	1	0	NA
chr17	58858337	+	CG	1	0.857	0.857	1	0.889	1	0.904667	0.963	0.0583333	0.391549
chr17	58858338	-	CG	1	1	0.833	1	1	0.667	0.944333	0.889	-0.0553333	0.686589
chr17	58858413	+	CG	1	1	1	1	1	1	1	1	0	NA
chr17	58858414	-	CG	1	1	1	0.923	1	1	1	0.974333	-0.0256667	0.42265
chr17	58858440	+	CG	0.875	1	1	0.8	1	1	0.958333	0.933333	-0.025	0.769265
chr17	58858441	-	CG	1	1	1	1	1	1	1	1	0	NA
chr17	58858452	+	CG	1	1	1	1	1	1	1	1	0	NA
chr17	58858453	-	CG	0.867	1	0.947	1	0.938	1	0.938	0.979333	0.0413333	0.414096
chr17	58858465	+	CG	1	1	1	1	1	0.8	1	0.933333	-0.0666667	0.42265
chr17	58858466	-	CG	0.933	1	0.9	0.938	1	0.9	0.944333	0.946	0.00166667	0.969824
chr17	58858473	+	CG	0.9	0.833	1	0.833	1	0.9	0.911	0.911	0	1
chr17	58858474	-	CG	0.875	1	0.95	1	0.917	0.9	0.941667	0.939	-0.00266667	0.95815
chr17	58858490	+	CG	1	1	1	1	1	0.909	1	0.969667	-0.0303333	0.42265
chr17	58858491	-	CG	1	1	1	1	1	1	1	1	0	NA
chr17	58858498	+	CG	0.889	1	1	1	1	0.909	0.963	0.969667	0.00666667	0.896161
chr17	58858499	-	CG	0.9	0.875	0.929	1	0.917	1	0.901333	0.972333	0.071	0.107061
chr17	58858545	+	CG	0.8	1	1	1	0.9	1	0.933333	0.966667	0.0333333	0.685598
chr17	58858546	-	CG	0.875	1	1	1	1	1	0.958333	1	0.0416667	0.42265
chr17	58858559	+	CG	0.615	0.429	0.933	0.875	1	0.833	0.659	0.902667	0.243667	0.234287
chr17	58858560	-	CG	0.758	1	1	1	1	1	0.919333	1	0.0806667	0.42265
chr17	58858563	+	CG	0.857	1	1	1	1	1	0.952333	1	0.0476667	0.42265
chr17	58858564	-	CG	0.933	1	0.917	1	1	1	0.95	1	0.05	0.188109
chr17	58858568	+	CG	0.933	0.857	1	1	1	0.889	0.93	0.963	0.033	0.584191
chr17	58858569	-	CG	0.933	1	1	0.929	0.917	1	0.977667	0.948667	-0.029	0.445173
chr17	58858623	+	CG	1	1	1	1	0.9	1	1	0.966667	-0.0333333	0.42265
chr17	58858624	-	CG	0.75	0.857	0.929	1	0.909	1	0.845333	0.969667	0.124333	0.124595
chr17	58858638	+	CG	1	1	1	1	1	0.833	1	0.944333	-0.0556667	0.42265
chr17	58858639	-	CG	0.923	1	1	1	0.923	1	0.974333	0.974333	0	1
chr17	58858686	+	CG	1	1	1	0.909	1	1	1	0.969667	-0.0303333	0.42265
chr17	58858687	-	CG	0.833	0.917	1	1	1	0.909	0.916667	0.969667	0.053	0.413849
chr17	58858711	+	CG	0.846	1	1	0.923	1	0.75	0.948667	0.891	-0.0576667	0.560522
chr17	58858712	-	CG	0.895	0.917	1	0.895	0.917	1	0.937333	0.937333	0	1
chr17	58858741	+	CG	0.889	1	1	0.917	0.889	0.8	0.963	0.868667	-0.0943333	0.138893
chr17	58858742	-	CG	1	1	1	1	0.917	1	1	0.972333	-0.0276667	0.42265
chr17	58858774	+	CG	0.909	1	1	1	1	1	0.969667	1	0.0303333	0.42265
chr17	58858775	-	CG	0.833	1	1	1	1	1	0.944333	1	0.0556667	0.42265
chr17	58858797	+	CG	0.889	1	1	1	1	0.923	0.963	0.974333	0.0113333	0.815127
chr17	58858798	-	CG	1	1	0.917	0.929	1	1	0.972333	0.976333	0.004	0.917928
chr17	58858806	+	CG	0.889	0.857	0.929	0.933	1	1	0.891667	0.977667	0.086	0.0482819
chr17	58858807	-	CG	1	1	0.917	1	0.9	1	0.972333	0.966667	-0.00566667	0.902443
chr17	58858829	+	CG	1	1	0.909	1	1	0.917	0.969667	0.972333	0.00266667	0.951353
chr17	58858830	-	CG	1	1	0.917	0.929	1	0.923	0.972333	0.950667	-0.0216667	0.590996
chr17	58858838	+	CG	1	1	1	0.929	1	0.917	1	0.948667	-0.0513333	0.185971
chr17	58858839	-	CG	0.917	1	0.889	0.875	1	1	0.935333	0.958333	0.023	0.689649
chr17	58858881	+	CG	1	1	0.833	1	1	1	0.944333	1	0.0556667	0.42265
chr17	58858882	-	CG	1	0.833	1	1	1	1	0.944333	1	0.0556667	0.42265
chr17	58858883	+	CG	1	1	1	1	1	1	1	1	0	NA
chr17	58858884	-	CG	1	0.833	1	1	1	1	0.944333	1	0.0556667	0.42265
chr17	58858899	+	CG	1	1	1	0.923	0.857	1	1	0.926667	-0.0733333	0.217938
chr17	58858900	-	CG	0.818	0.833	0.889	0.923	1	1	0.846667	0.974333	0.127667	0.0200432
chr17	58858901	+	CG	0.857	1	1	1	1	1	0.952333	1	0.0476667	0.42265
chr17	58858902	-	CG	1	1	1	0.923	1	1	1	0.974333	-0.0256667	0.42265
chr17	58858914	+	CG	1	1	0.833	0.917	1	1	0.944333	0.972333	0.028	0.683624
chr17	58858915	-	CG	1	1	1	0.909	0.833	1	1	0.914	-0.086	0.216778
chr17	58858934	+	CG	1	1	1	1	1	1	1	1	0	NA
chr17	58858935	-	CG	1	1	1	1	1	1	1	1	0	NA
chr17	58858936	+	CG	1	1	1	1	1	1	1	1	0	NA
chr17	58858937	-	CG	1	1	0.857	1	1	1	0.952333	1	0.0476667	0.42265
chr17	58858959	+	CG	0.6	1	1	1	1	1	0.866667	1	0.133333	0.42265
chr17	58858960	-	CG	1	1	1	0.8	0.8	1	1	0.866667	-0.133333	0.183503
chr17	58858963	+	CG	0.4	1	0.8	0.833	0.75	1	0.733333	0.861	0.127667	0.557164
chr17	58858964	-	CG	1	1	1	1	1	0	1	0.666667	-0.333333	0.42265
chr17	58858966	+	CG	1	1	1	1	1	1	1	1	0	NA
chr17	58859102	-	CG	1	1	1	1	1	1	1	1	0	NA
chr17	58859118	+	CG	0	1	0.909	0.9	1	1	0.636333	0.966667	0.330333	0.409625
chr17	58859119	-	CG	1	1	1	1	1	1	1	1	0	NA
chr17	58859125	+	CG	0	1	0.917	0.909	1	1	0.639	0.969667	0.330667	0.410597
chr17	58859126	-	CG	1	0.833	1	1	1	1	0.944333	1	0.0556667	0.42265
chr17	58859132	+	CG	1	1	1	0.917	1	1	1	0.972333	-0.0276667	0.42265
chr17	58859133	-	CG	1	1	1	1	0.909	1	1	0.969667	-0.0303333	0.42265
chr17	58859140	+	CG	1	1	1	1	1	1	1	1	0	NA
chr17	58859141	-	CG	1	1	0.833	1	1	1	0.944333	1	0.0556667	0.42265
chr17	58859146	+	CG	1	1	1	1	1	1	1	1	0	NA
chr17	58859147	-	CG	1	1	1	1	0.917	1	1	0.972333	-0.0276667	0.42265
chr17	58859157	+	CG	1	1	0.929	1	1	1	0.976333	1	0.0236667	0.42265
chr17	58859158	-	CG	1	1	0.857	0.6	1	1	0.952333	0.866667	-0.0856667	0.59555
chr17	58859170	+	CG	1	1	1	1	1	1	1	1	0	NA
chr17	58859171	-	CG	1	0.875	1	1	1	1	0.958333	1	0.0416667	0.42265
chr17	58859174	+	CG	1	1	1	1	1	1	1	1	0	NA
chr17	58859175	-	CG	0.75	1	1	1	1	1	0.916667	1	0.0833333	0.42265
chr17	58859182	+	CG	1	1	1	0.846	1	1	1	0.948667	-0.0513333	0.42265
chr17	58859183	-	CG	1	1	1	1	0.923	1	1	0.974333	-0.0256667	0.42265
chr17	58859213	+	CG	1	1	1	1	1	1	1	1	0	NA
chr17	58859214	-	CG	1	1	1	1	1	1	1	1	0	NA
chr17	58859225	+	CG	1	1	1	0.882	1	1	1	0.960667	-0.0393333	0.42265
chr17	58859226	-	CG	0.857	1	1	1	1	0.667	0.952333	0.889	-0.0633333	0.639867
chr17	58859231	+	CG	0.667	0.667	1	0.882	1	1	0.778	0.960667	0.182667	0.236363
chr17	58859232	-	CG	0.857	1	0.875	0.714	0.833	0.8	0.910667	0.782333	-0.128333	0.0921946
chr17	58859246	+	CG	1	1	0.75	0.857	0.9	0.9	0.916667	0.885667	-0.031	0.747311
chr17	58859247	-	CG	0.857	0.692	1	1	0.923	0.8	0.849667	0.907667	0.058	0.61884
chr17	58859250	+	CG	1	1	0.917	1	1	1	0.972333	1	0.0276667	0.42265
chr17	58859251	-	CG	0.857	1	0.889	1	1	0.8	0.915333	0.933333	0.018	0.833723
chr17	58859269	+	CG	0.8	1	1	1	1	1	0.933333	1	0.0666667	0.42265
chr17	58859270	-	CG	0.8	0.818	1	1	0.789	0.75	0.872667	0.846333	-0.0263333	0.806796
chr17	58859318	+	CG	1	1	1	1	1	0.909	1	0.969667	-0.0303333	0.42265
chr17	58859319	-	CG	0.786	0.867	1	1	0.947	1	0.884333	0.982333	0.098	0.25301
chr17	58859375	+	CG	0.857	1	0.889	1	1	0.9	0.915333	0.966667	0.0513333	0.404133
chr17	58859376	-	CG	0.9	0.929	0.909	0.833	0.955	0.938	0.912667	0.908667	-0.004	0.927087
chr17	58859382	+	CG	1	1	1	0.929	0.889	1	1	0.939333	-0.0606667	0.202536
[truncated: 15,128 more rows]
