# Supplementary material for: Identification of a Novel Imprinted Transcript in the Porcine GNAS Complex Locus Using Methylome and Transcriptome of Parthenogenetic Fetuses
Source: Genes (Basel). 2020 Jan 14;11(1):96. doi: 10.3390/genes11010096 (PMC7017182; doi:10.3390/genes11010096)
Supplement: Supplementary file 1 [file genes-11-00096-s001.zip › Supplementary_Table_2.xlsx]

## Sheet: DMR
chr	start	stop	q-value	mean difference: mean g1 - mean g2	#CpGs	p (MWU)	p (2D KS)	mean g1	mean g2
chr17	58962166	58962519	0.00089162	-0.221713	36	1.6289e-10	1.2604e-06	0.56218	0.78389
chr17	58984810	58985180	2.1952e-18	0.382118	31	4.0745e-14	1.3066e-21	0.42068	0.038559
chr17	58985180	58987592	6.4939e-285	0.510129	382	1	2.6573e-288	0.51573	0.005603
chr17	58987592	58987966	6.4939e-285	0.350181	68	5.6177e-14	4.7978e-55	0.35856	0.0083775
chr17	58987966	58988584	6.4939e-285	0.434432	95	3.5527e-14	2.9534e-79	0.43949	0.0050632
chr17	58988602	58988914	0.0015839	0.244803	22	6.2564e-08	2.3568e-06	0.2587	0.013894
chr17	58988992	58989051	3.8761e-09	0.494917	12	1.5627e-12	3.1722e-12	0.50264	0.0077222
chr17	58989092	58989988	5.2097e-09	0.267773	22	3.3085e-13	4.6512e-12	0.30427	0.0365
chr17	58995283	58995515	1.3839e-16	-0.560116	23	4.1855e-14	8.7517e-20	0.33378	0.8939
chr17	58995515	58995698	2.0737e-07	-0.334133	15	1.9754e-09	2.0828e-10	0.50107	0.8352
chr17	58995711	58997010	6.4939e-285	-0.471628	182	5.973e-14	4.5113e-125	0.48181	0.95344
chr17	58997010	58997212	3.3077e-30	-0.615935	36	3.7303e-14	1.5996e-33	0.33127	0.9472
chr17	58997212	58997800	6.4939e-285	-0.472615	77	4.0856e-14	4.4387e-63	0.48526	0.95787
chr17	58997805	58997937	1.6501e-16	-0.657864	22	4.0301e-14	1.1049e-19	0.30621	0.96408
chr17	58997995	58998923	6.4939e-285	-0.486507	100	3.6637e-14	3.5229e-63	0.44848	0.93499
chr17	58999557	58999734	9.3478e-09	-0.449643	14	5.4179e-14	8.6933e-12	0.40395	0.8536
chr17	58999741	58999982	6.4939e-285	-0.604149	58	3.9746e-14	5.7366e-47	0.32997	0.93411
chr17	59000072	59000193	4.1221e-09	-0.547561	19	4.0523e-14	3.5268e-12	0.34819	0.89575
chr17	59000209	59000498	2.1917e-25	-0.383039	51	4.4964e-14	1.1414e-28	0.55624	0.93928
chr17	59000498	59000863	6.4939e-285	-0.547643	83	4.2855e-14	8.1263e-69	0.40203	0.94967
chr17	59000863	59001034	3.7411e-24	-0.466514	35	4.9405e-14	2.0875e-27	0.48404	0.95055
chr17	59001146	59001638	1.3493e-39	-0.455451	68	5.0959e-14	6.0234e-43	0.49594	0.95139
chr17	59001643	59001882	3.6206e-12	-0.61087	18	4.4409e-14	2.8284e-15	0.25174	0.86261
chr17	59001993	59002279	5.2859e-08	-0.36575	20	4.4742e-14	5.1125e-11	0.44772	0.81347
chr17	59018234	59018453	1.0985e-06	-0.286402	58	4.7184e-14	1.2668e-09	0.42979	0.7162
chr17	59020281	59020403	0.028859	-0.330929	14	2.8209e-07	6.7521e-05	0.2685	0.59943
chr17	59030828	59032113	6.4939e-285	-0.3596	307	1.3434e-14	1.5155e-208	0.6213	0.9809
chr17	59032113	59032641	6.4939e-285	-0.579285	82	3.0531e-14	1.0299e-66	0.39773	0.97701
chr17	59032685	59033184	6.4939e-285	-0.58357	110	3.9191e-14	3.3384e-76	0.37799	0.96156
chr17	59033184	59033492	8.493e-14	-0.33865	61	4.3299e-14	6.0028e-17	0.40125	0.7399
chr17	59044025	59044160	0.025638	0.281896	16	8.1603e-07	5.6547e-05	0.47971	0.19781
