# Supplementary material for: Identification of a Novel Imprinted Transcript in the Porcine GNAS Complex Locus Using Methylome and Transcriptome of Parthenogenetic Fetuses
Source: Genes (Basel). 2020 Jan 14;11(1):96. doi: 10.3390/genes11010096 (PMC7017182; doi:10.3390/genes11010096)
Supplement: Supplementary file 1 [file genes-11-00096-s001.zip › Supplementary_Table_3.xlsx]

## Sheet: Sheet1
featureID	exonBaseMean	dispersion	stat	pvalue	padj	log2fold_parthenote_control	genomicData.seqnames	genomicData.start	genomicData.end	genomicData.width	genomicData.strand	countData.CN1	countData.CN2	countData.CN3	countData.PA1	countData.PA2	countData.PA3	groupID
E001	1717.53	0.0142676	1.83137	0.175966	0.91913	0.453454	17	58985580	58986799	1220	+	1254	1521	1644	2128	1672	2251	ENSSSCG00000033041+ENSSSCG00000007520
E002	3.06686	0.0327347	23.0409	1.58594e-06	0.000731845	-10.8138	17	58996201	58996550	350	+	4	5	9	0	0.01	0	ENSSSCG00000033041+ENSSSCG00000007520
E003	211.314	0.000470941	1506.29	0	0	-6.32912	17	58998981	59000952	1972	+	394	405	407	2	4	9	ENSSSCG00000033041+ENSSSCG00000007520
E004	163.359	0.00843835	368.619	3.73937e-82	2.06635e-77	-4.10369	17	59029999	59031504	1506	+	335	259	300	16	15	21	ENSSSCG00000033041+ENSSSCG00000007520
E005	82.3014	0.00598999	376.664	6.62558e-84	4.88169e-79	-5.40785	17	59031844	59032048	205	+	134	158	175	3	3	5	ENSSSCG00000033041+ENSSSCG00000007520
E006	5292.91	0.0125635	2.31445	0.128176	0.878517	0.411834	17	59034106	59034586	481	+	3785	4922	5156	5211	6164	7068	ENSSSCG00000033041+ENSSSCG00000007520
E007	11416.6	0.0136113	0.0603779	0.8059	0.997277	0.187579	17	59038268	59053021	14754	+	11522	11200	9550	11128	12963	12662	ENSSSCG00000033041+ENSSSCG00000007520
